# Supplementary material for: PenDA, a rank-based method for personalized differential analysis: Application to lung cancer
Source: PubMed Central journal article supplement (PMC7274464; doi:10.1371/journal.pcbi.1007869), 2020-05-11
Supplement: pcbi.1007869.s002.pdf [file pcbi.1007869.s002.pdf]

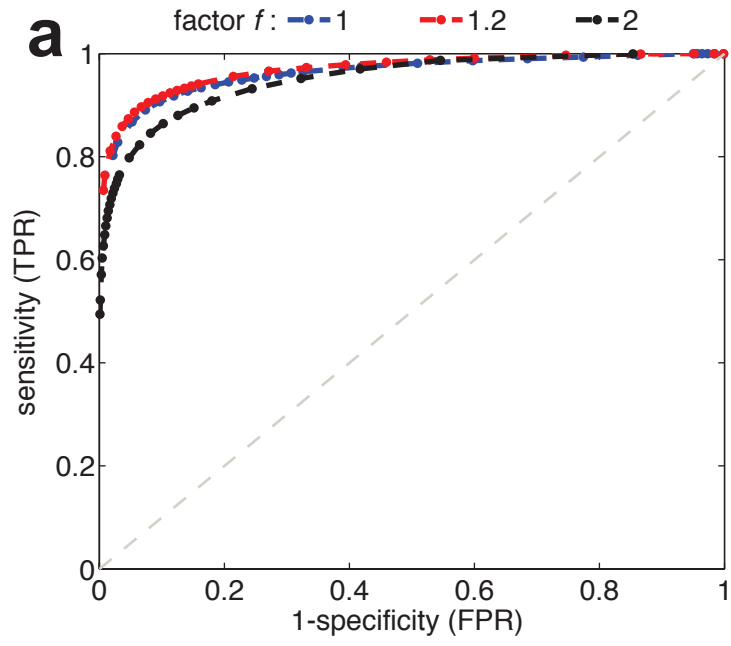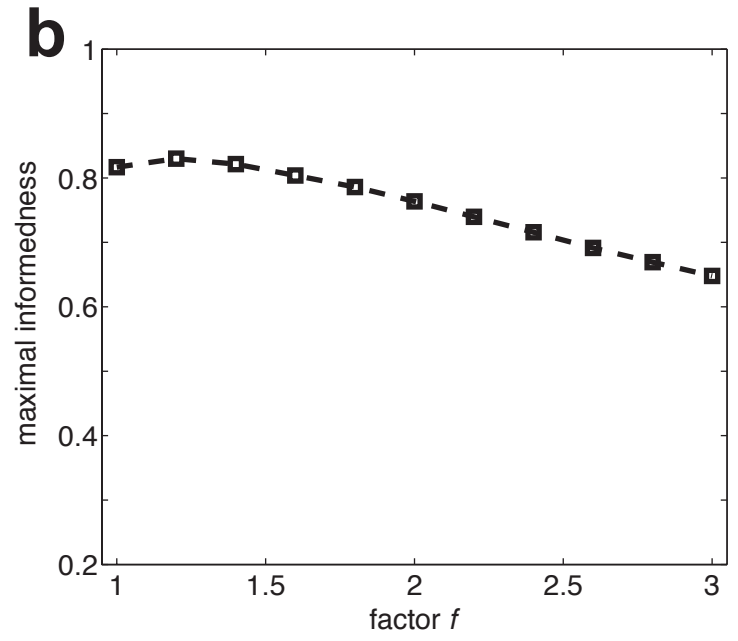

**S2 Fig.** Test of the percentile method. (a) ROC curve of the percentile method obtained by varying parameter  $x$  for different values of factor  $f$ . TPR and FPR were computed on a set of 10 simulations. (b) Maximal informedness of the ROC curve as a function of  $f$ .
