# Supplementary material for: PenDA, a rank-based method for personalized differential analysis: Application to lung cancer
Source: PubMed Central journal article supplement (PMC7274464; doi:10.1371/journal.pcbi.1007869), 2020-05-11
Supplement: pcbi.1007869.s006.pdf [file pcbi.1007869.s006.pdf]

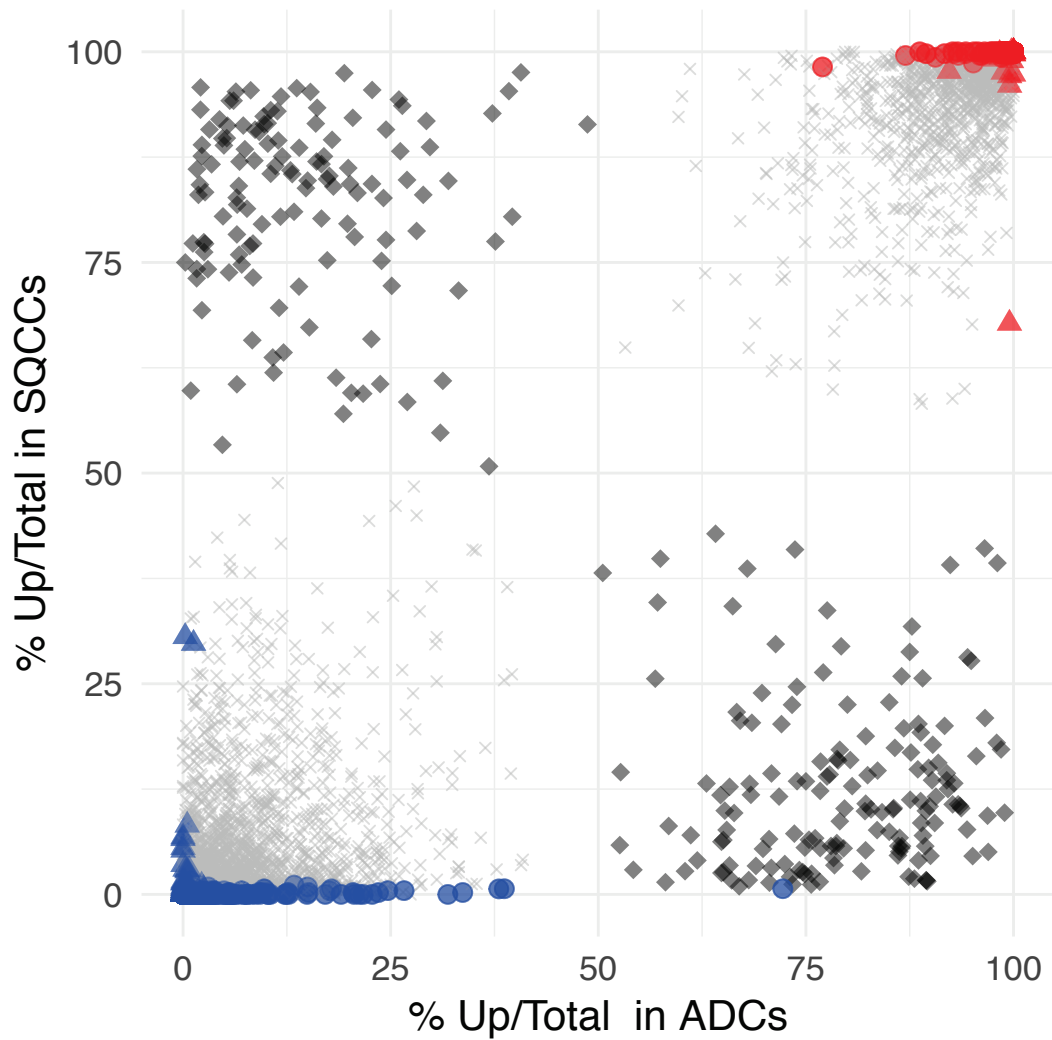

**S6 Fig.** Gene deregulation commitment in ADCs and SQCCs. Genes deregulated in more than 30 % of the patient are depicted in the diagram. x-axis corresponds to the % of up-regulation/total-deregulation in ADC, y-axis corresponds to the % of up-regulation/total-deregulation in SQCC. Each dot (gray cross) corresponds to one gene. Blue points correspond to super-down-regulated genes, red points correspond to super-up-regulated genes (triangles for ADC, circles for SQCC). Diamonds black points represent genes displaying antagonistic commitment behaviour between ADC and SQCC (~5% of the total number of genes depicted).
