# Supplementary material for: PenDA, a rank-based method for personalized differential analysis: Application to lung cancer
Source: PubMed Central journal article supplement (PMC7274464; doi:10.1371/journal.pcbi.1007869), 2020-05-11
Supplement: pcbi.1007869.s009.pdf [file pcbi.1007869.s009.pdf]

**a**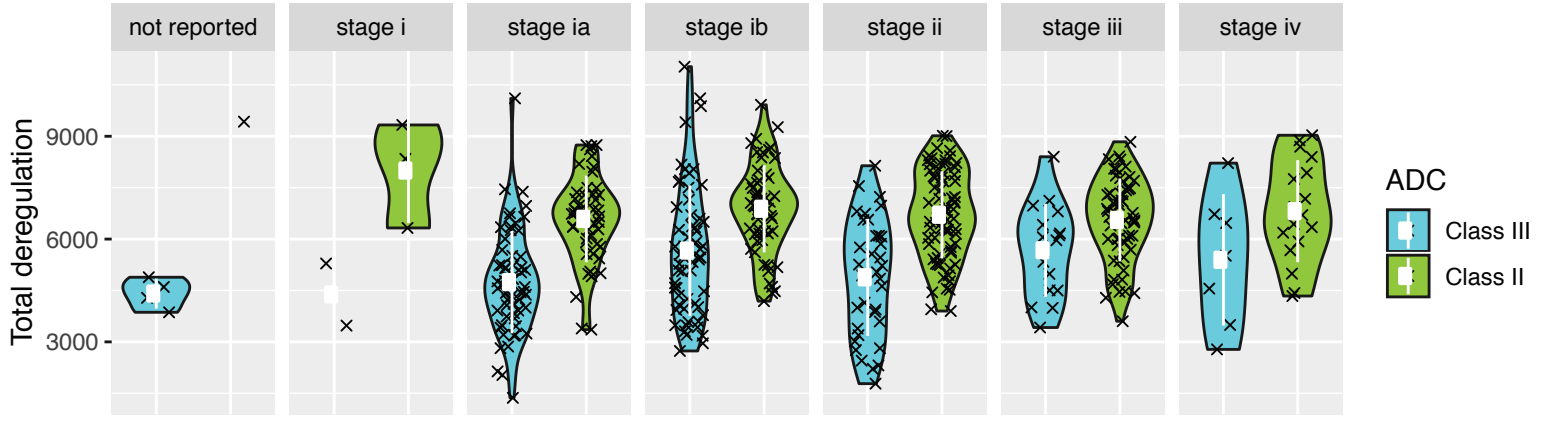**b**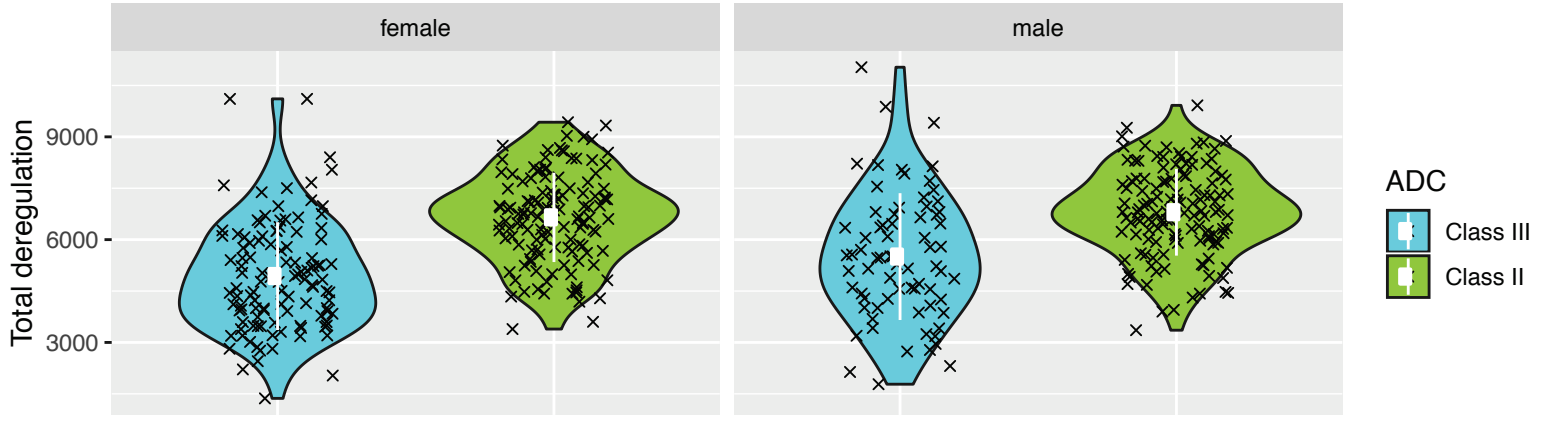**c**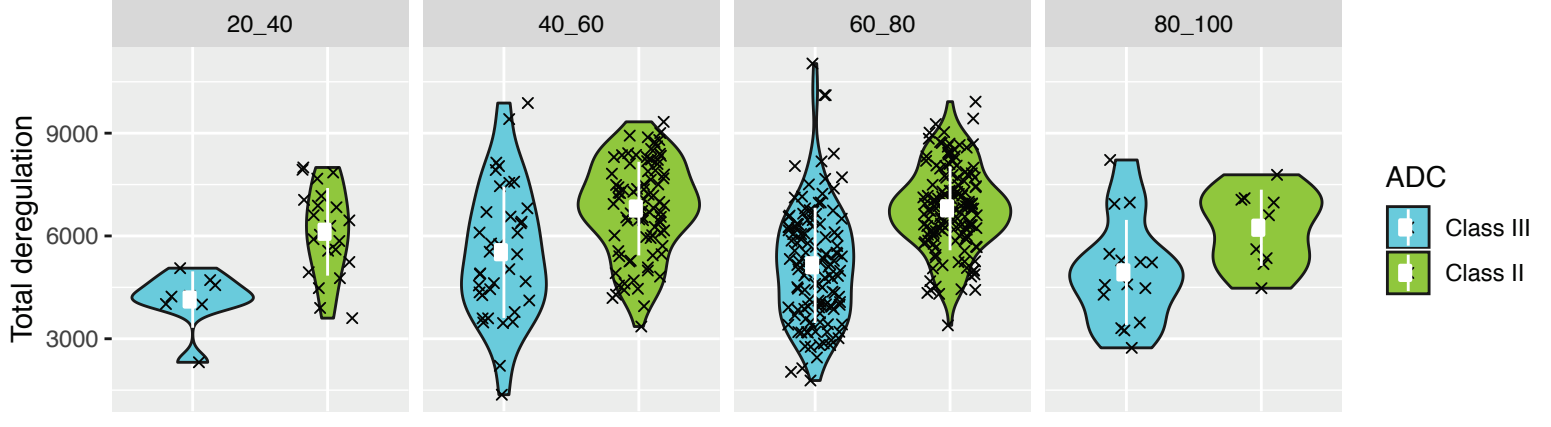

**S9 Fig.** Effect of putative confounding factors on ADC classification in class II and III. (a) Effect of cancer stage patients (chi square test p-value = 0.2133). (b) Effect of gender (chi square test p-value = 1). (c) Effect of age patients (chi square test p-value = 0.2133).
