# Supplementary material for: PenDA, a rank-based method for personalized differential analysis: Application to lung cancer
Source: PLoS Comput Biol. 2020 May 11;16(5):e1007869. doi: 10.1371/journal.pcbi.1007869 (PMC7274464; doi:10.1371/journal.pcbi.1007869)
Supplement: S2 Table — (CSV) [file pcbi.1007869.s015.csv]

genes	pval_prop.test_down	sign_down_in	pval_prop.test_up	sign_up_in	pc_up_ADC	pc_dw_ADC	pc_tot_ADC	qval_tot_ADC	super_genes_ADC	pc_up_SQCC	pc_dw_SQCC	pc_tot_SQCC	qval_tot_SQCC	super_genes_SQCC
AFM	NaN	n.s	0.928345862419069	n.s	2,417582418	0	2,417582418	0,000478719	n.s	2,114164905	0	2,114164905	0,000303668	n.s
AFP	NaN	n.s	3.87769267628995e-06	n.s	10,54945055	0	10,54945055	0,543830581	n.s	21,98731501	0	21,98731501	0,811977411	n.s
AHSG	NaN	n.s	1.23600075768754e-19	lusc	5,274725275	0	5,274725275	0,078285304	n.s	27,69556025	0	27,69556025	0,855340762	n.s
ALPI	NaN	n.s	0.0965271530652192	n.s	6,153846154	0	6,153846154	0,150368874	n.s	3,594080338	0	3,594080338	0,014796286	n.s
ALX3	NaN	n.s	0.00664028804450855	n.s	27,03296703	0	27,03296703	0,88336279	n.s	35,5179704	0	35,5179704	0,888401111	n.s
AMBN	NaN	n.s	0.235904502219877	n.s	3,296703297	0	3,296703297	0,005883465	n.s	5,073995772	0	5,073995772	0,077701469	n.s
AMELX	NaN	n.s	0.568406209287654	n.s	2,197802198	0	2,197802198	0,00018585	n.s	1,479915433	0	1,479915433	5,05E-06	n.s
AMELY	NaN	n.s	0.674124455330735	n.s	5,274725275	0	5,274725275	0,078285304	n.s	6,131078224	0	6,131078224	0,160067562	n.s
AMY1A	NaN	n.s	0.00345864859196874	n.s	2,197802198	0	2,197802198	0,00018585	n.s	0	0	0	NA	n.s
AMY2A	NaN	n.s	0.00214641333603243	n.s	6,373626374	0	6,373626374	0,171035397	n.s	2,114164905	0	2,114164905	0,000303668	n.s
APCS	NaN	n.s	0.847362699168035	n.s	4,175824176	0	4,175824176	0,025035949	n.s	4,651162791	0	4,651162791	0,052230559	n.s
APOA4	NaN	n.s	0.00375934716029305	n.s	3,956043956	0	3,956043956	0,018624452	n.s	0,845665962	0	0,845665962	1,42E-10	n.s
APOBEC1	NaN	n.s	1.8845673119576e-15	luad	40,43956044	0	40,43956044	0,878611098	n.s	16,70190275	0	16,70190275	0,735541931	n.s
PHOX2A	NaN	n.s	0.00102793459639493	n.s	6,153846154	0	6,153846154	0,150368874	n.s	12,68498943	0	12,68498943	0,619423753	n.s
ATOH1	NaN	n.s	0.960210679952256	n.s	8,571428571	0	8,571428571	0,387901866	n.s	8,8794926	0	8,8794926	0,400489398	n.s
ATP4A	NaN	n.s	5.97298008955942e-52	lusc	5,274725275	0	5,274725275	0,078285304	n.s	50,31712474	0	50,31712474	0,885134274	n.s
AVP	NaN	n.s	0.0968543867555256	n.s	3,736263736	0	3,736263736	0,013285131	n.s	6,342494715	0	6,342494715	0,178662404	n.s
AVPR1B	NaN	n.s	4.53132959701056e-11	luad	17,58241758	0	17,58241758	0,792617318	n.s	4,016913319	0	4,016913319	0,026653234	n.s
FOXL2	NaN	n.s	1.79549651277347e-68	lusc	14,50549451	0	14,50549451	0,722403114	n.s	71,67019027	0	71,67019027	0,749517508	n.s
S100G	NaN	n.s	0.00616860729985191	n.s	1,978021978	0	1,978021978	5,78E-05	n.s	0	0	0	NA	n.s
CCKAR	NaN	n.s	0.325788849347351	n.s	6,813186813	0	6,813186813	0,214226	n.s	5,073995772	0	5,073995772	0,077701469	n.s
CDH9	NaN	n.s	0.0211543150868821	n.s	1,758241758	0	1,758241758	1,33E-05	n.s	4,651162791	0	4,651162791	0,052230559	n.s
CDH18	NaN	n.s	0.384759900506074	n.s	18,24175824	0	18,24175824	0,803465788	n.s	20,71881607	0	20,71881607	0,798114318	n.s
CDX2	NaN	n.s	0.153754799471267	n.s	35,82417582	0	35,82417582	0,8971301	n.s	40,59196617	0	40,59196617	0,902125629	n.s
CGA	NaN	n.s	3.63889818542936e-12	luad	20,43956044	0	20,43956044	0,832690821	n.s	5,073995772	0	5,073995772	0,077701469	n.s
CGB3	NaN	n.s	0.898108511406869	n.s	9,89010989	0	9,89010989	0,497775685	n.s	10,35940803	0	10,35940803	0,503300102	n.s
CHAT	NaN	n.s	8.70806170295369e-09	lusc	16,26373626	0	16,26373626	0,767070301	n.s	32,76955603	0	32,76955603	0,878905289	n.s
CHRNB3	NaN	n.s	0.18042973449485	n.s	2,417582418	0	2,417582418	0,000478719	n.s	1,057082452	0	1,057082452	1,96E-08	n.s
CHRND	NaN	n.s	0.925951608180337	n.s	10,54945055	0	10,54945055	0,543830581	n.s	10,14799154	0	10,14799154	0,490122766	n.s
CLCA1	NaN	n.s	5.59229483421968e-05	n.s	6,593406593	0	6,593406593	0,19238467	n.s	1,268498943	0	1,268498943	4,87E-07	n.s
CLPS	NaN	n.s	0.0245880033078398	n.s	8,791208791	0	8,791208791	0,407819354	n.s	4,862579281	0	4,862579281	0,064318205	n.s
CNGA2	NaN	n.s	0.497509143152232	n.s	1,318681319	0	1,318681319	1,51E-07	n.s	2,114164905	0	2,114164905	0,000303668	n.s
CPN1	NaN	n.s	0.559553249021361	n.s	14,06593407	0	14,06593407	0,708768642	n.s	15,6448203	0	15,6448203	0,712039028	n.s
CRYBA2	NaN	n.s	0.00224595612284256	n.s	26,81318681	0	26,81318681	0,882212273	n.s	36,36363636	0	36,36363636	0,89099103	n.s
CSH2	NaN	n.s	0.470357238731115	n.s	4,835164835	0	4,835164835	0,052352371	n.s	6,131078224	0	6,131078224	0,160067562	n.s
CSN1S1	NaN	n.s	0.0129136307321818	n.s	1,318681319	0	1,318681319	1,51E-07	n.s	4,22832981	0	4,22832981	0,033934328	n.s
CSN2	NaN	n.s	0.000322254074935222	n.s	3,736263736	0	3,736263736	0,013285131	n.s	9,936575053	0	9,936575053	0,476451783	n.s
CSN3	NaN	n.s	8.54666593392486e-18	lusc	0,43956044	0	0,43956044	1,56E-14	n.s	16,49048626	0	16,49048626	0,731145403	n.s
CST4	NaN	n.s	0.225636332597032	n.s	59,12087912	0	59,12087912	0,714862313	n.s	63,21353066	0	63,21353066	0,82775707	n.s
NKX2-5	NaN	n.s	1.24779737933689e-64	lusc	8,791208791	0	8,791208791	0,407819354	n.s	62,57928118	0	62,57928118	0,831797089	n.s
CYP2C19	NaN	n.s	0.171664952628183	n.s	9,450549451	0	9,450549451	0,463779977	n.s	12,47357294	0	12,47357294	0,610781478	n.s
DAZ1	NaN	n.s	0.797701254996192	n.s	0,879120879	0	0,879120879	1,83E-11	n.s	1,268498943	0	1,268498943	4,87E-07	n.s
DCX	NaN	n.s	0.00672595912350113	n.s	7,472527473	0	7,472527473	0,280941555	n.s	13,10782241	0	13,10782241	0,635750288	n.s
DEFA5	NaN	n.s	0.909648702112744	n.s	3,736263736	0	3,736263736	0,013285131	n.s	3,382663848	0	3,382663848	0,01036677	n.s
DEFA6	NaN	n.s	0.462394150603265	n.s	1,098901099	0	1,098901099	4,22E-09	n.s	1,902748414	0	1,902748414	0,000107006	n.s
DLX2	NaN	n.s	2.04355475145247e-86	lusc	12,52747253	0	12,52747253	0,650662248	n.s	77,16701903	0	77,16701903	0,654601102	n.s
DMP1	NaN	n.s	2.53174020957723e-22	lusc	10,10989011	0	10,10989011	0,513776038	n.s	37,63213531	0	37,63213531	0,894627847	n.s
DMRT1	NaN	n.s	7.76847321828902e-64	lusc	22,63736264	0	22,63736264	0,854206578	n.s	78,22410148	0	78,22410148	0,629285589	n.s
DNTT	NaN	n.s	0.0481858119581194	n.s	5,494505495	0	5,494505495	0,094369418	n.s	9,090909091	0	9,090909091	0,416699121	n.s
DRD3	NaN	n.s	0.000486860741919099	n.s	0,21978022	0	0,21978022	1,56E-14	n.s	3,594080338	0	3,594080338	0,014796286	n.s
DSPP	NaN	n.s	3.80066974901187e-24	lusc	6,593406593	0	6,593406593	0,19238467	n.s	33,61522199	0	33,61522199	0,882020111	n.s
EFNA2	NaN	n.s	0.230904208053906	n.s	47,47252747	0	47,47252747	0,838965411	n.s	43,34038055	0	43,34038055	0,903292355	n.s
EN1	NaN	n.s	2.0491228019826e-88	lusc	8,791208791	0	8,791208791	0,407819354	n.s	73,57293869	0	73,57293869	0,722367743	n.s
EPHA8	NaN	n.s	1.37635095512419e-11	lusc	18,9010989	0	18,9010989	0,813253689	n.s	39,32346723	0	39,32346723	0,899066651	n.s
EVX1	NaN	n.s	4.67983382875757e-05	n.s	17,8021978	0	17,8021978	0,79636063	n.s	29,38689218	0	29,38689218	0,864287938	n.s
F2	NaN	n.s	1.02891860876974e-07	luad	14,94505495	0	14,94505495	0,734949671	n.s	4,4397463	0	4,4397463	0,041843083	n.s
F9	NaN	n.s	0.682586333204779	n.s	1,538461538	0	1,538461538	1,97E-06	n.s	2,114164905	0	2,114164905	0,000303668	n.s
F13B	NaN	n.s	0.774667327145106	n.s	5,494505495	0	5,494505495	0,094369418	n.s	4,862579281	0	4,862579281	0,064318205	n.s
FGF3	NaN	n.s	2.88295201474032e-10	lusc	1,098901099	0	1,098901099	4,22E-09	n.s	11,41649049	0	11,41649049	0,562202164	n.s
FGF4	NaN	n.s	0.000265635912832479	n.s	2,197802198	0	2,197802198	0,00018585	n.s	7,610993658	0	7,610993658	0,293708359	n.s
FGF5	NaN	n.s	0.000210560242190707	n.s	27,03296703	0	27,03296703	0,88336279	n.s	38,68921776	0	38,68921776	0,897453144	n.s
FOXG1	NaN	n.s	0.000146676547825846	n.s	15,82417582	0	15,82417582	0,757193007	n.s	26,21564482	0	26,21564482	0,846336979	n.s
FOXE3	NaN	n.s	1.74828462677664e-06	n.s	22,41758242	0	22,41758242	0,852319552	n.s	36,99788584	0	36,99788584	0,892844877	n.s
ADAM2	NaN	n.s	2.7976361625324e-06	n.s	18,68131868	0	18,68131868	0,810100082	n.s	8,033826638	0	8,033826638	0,33090875	n.s
GAST	NaN	n.s	7.72678446721021e-78	lusc	8,131868132	0	8,131868132	0,346388763	n.s	68,07610994	0	68,07610994	0,789499619	n.s
FUT5	NaN	n.s	7.23597555841312e-11	lusc	3,516483516	0	3,516483516	0,009048815	n.s	16,70190275	0	16,70190275	0,735541931	n.s
G6PC	NaN	n.s	1	n.s	2,637362637	0	2,637362637	0,001049743	n.s	2,536997886	0	2,536997886	0,00146747	n.s
GAGE1	NaN	n.s	6.32451337831333e-05	n.s	5,714285714	0	5,714285714	0,111852795	n.s	13,74207188	0	13,74207188	0,658045173	n.s
GABRA1	NaN	n.s	5.74502480747207e-07	n.s	2,857142857	0	2,857142857	0,002066819	n.s	11,62790698	0	11,62790698	0,572683649	n.s
GABRA5	NaN	n.s	6.87689023030518e-26	lusc	11,64835165	0	11,64835165	0,608425629	n.s	42,70613108	0	42,70613108	0,904690792	n.s
GABRG2	NaN	n.s	7.83280764418722e-33	lusc	13,62637363	0	13,62637363	0,693928181	n.s	50,52854123	0	50,52854123	0,884488331	n.s
GAD2	NaN	n.s	0.000146789674507822	n.s	3,736263736	0	3,736263736	0,013285131	n.s	10,35940803	0	10,35940803	0,503300102	n.s
GBX1	NaN	n.s	0.205947362547802	n.s	9,230769231	0	9,230769231	0,445780319	n.s	6,765327696	0	6,765327696	0,216832269	n.s
GC	NaN	n.s	0.041586273076276	n.s	5,054945055	0	5,054945055	0,063729344	n.s	2,325581395	0	2,325581395	0,000721163	n.s
GCG	NaN	n.s	5.30639653189264e-05	n.s	9,230769231	0	9,230769231	0,445780319	n.s	2,748414376	0	2,748414376	0,002687623	n.s
GH2	NaN	n.s	0.178300668589426	n.s	10,10989011	0	10,10989011	0,513776038	n.s	7,399577167	0	7,399577167	0,274680866	n.s
GHRH	NaN	n.s	4.42822283441217e-15	lusc	0,43956044	0	0,43956044	1,56E-14	n.s	14,16490486	0	14,16490486	0,67158978	n.s
GHSR	NaN	n.s	0.312326633754298	n.s	0,43956044	0	0,43956044	1,56E-14	n.s	1,268498943	0	1,268498943	4,87E-07	n.s
GIF	NaN	n.s	0.006159253999765	n.s	3,736263736	0	3,736263736	0,013285131	n.s	0,845665962	0	0,845665962	1,42E-10	n.s
GIP	NaN	n.s	7.87924492684785e-05	n.s	16,48351648	0	16,48351648	0,771732648	n.s	7,822410148	0	7,822410148	0,312472118	n.s
GNAT1	NaN	n.s	0.000330945973134795	n.s	5,494505495	0	5,494505495	0,094369418	n.s	12,47357294	0	12,47357294	0,610781478	n.s
GPR6	NaN	n.s	0.202800869350275	n.s	0,879120879	0	0,879120879	1,83E-11	n.s	2,114164905	0	2,114164905	0,000303668	n.s
PRLHR	NaN	n.s	0.01352029413294	n.s	5,714285714	0	5,714285714	0,111852795	n.s	2,325581395	0	2,325581395	0,000721163	n.s
GPR33	NaN	n.s	0.410709039442691	n.s	4,175824176	0	4,175824176	0,025035949	n.s	2,959830867	0	2,959830867	0,004544091	n.s
GPR42	NaN	n.s	0.999999999999998	n.s	0	0	0	NA	n.s	0,21141649	0	0,21141649	2,24E-14	n.s
GPX5	NaN	n.s	0.201174084078065	n.s	1,758241758	0	1,758241758	1,33E-05	n.s	0,634249471	0	0,634249471	3,43E-14	n.s
GSC2	NaN	n.s	4.63778521211032e-18	lusc	0,879120879	0	0,879120879	1,83E-11	n.s	17,7589852	0	17,7589852	0,755548798	n.s
GUCA1A	NaN	n.s	2.02041624975809e-11	lusc	18,02197802	0	18,02197802	0,79997482	n.s	38,05496829	0	38,05496829	0,895779191	n.s
HIST1H1B	NaN	n.s	8.7705397957829e-12	lusc	24,61538462	0	24,61538462	0,869115799	n.s	46,30021142	0	46,30021142	0,896263225	n.s
HIST1H1T	NaN	n.s	0.00389988163225137	n.s	14,72527473	0	14,72527473	0,728805475	n.s	8,456659619	0	8,456659619	0,36660228	n.s
HIST1H2BB	NaN	n.s	0.0553225608447433	n.s	9,67032967	0	9,67032967	0,481112045	n.s	13,95348837	0	13,95348837	0,664941562	n.s
HIST1H1A	NaN	n.s	0.1446792764871	n.s	4,175824176	0	4,175824176	0,025035949	n.s	6,553911205	0	6,553911205	0,19762874	n.s
HBG1	NaN	n.s	0.999999999999998	n.s	0,21978022	0	0,21978022	1,56E-14	n.s	0,21141649	0	0,21141649	2,24E-14	n.s
HCRT	NaN	n.s	0.00433333697578907	n.s	3,076923077	0	3,076923077	0,003614893	n.s	0,422832981	0	0,422832981	2,24E-14	n.s
HMX1	NaN	n.s	2.40178193855752e-33	lusc	3,736263736	0	3,736263736	0,013285131	n.s	35,5179704	0	35,5179704	0,888401111	n.s
HMX2	NaN	n.s	8.05893175272697e-23	lusc	11,42857143	0	11,42857143	0,596629446	n.s	39,9577167	0	39,9577167	0,900623099	n.s
ONECUT1	NaN	n.s	4.10854431246789e-19	luad	75,38461538	0	75,38461538	0,261534598	n.s	46,51162791	0	46,51162791	0,895726552	n.s
TLX1	NaN	n.s	2.78878119687997e-23	lusc	25,49450549	0	25,49450549	0,874729016	n.s	57,92811839	0	57,92811839	0,856694302	n.s
HOXA13	NaN	n.s	2.33634935185143e-81	lusc	23,95604396	0	23,95604396	0,864526262	n.s	86,46934461	0	86,46934461	0,302391953	n.s
HOXB1	NaN	n.s	3.75265465310471e-10	lusc	7,472527473	0	7,472527473	0,280941555	n.s	22,41014799	0	22,41014799	0,816158168	n.s
HOXC11	NaN	n.s	2.26907355543565e-18	lusc	48,57142857	0	48,57142857	0,831048972	n.s	76,53276956	0	76,53276956	0,668470778	n.s
HOXC12	NaN	n.s	1.85169002402169e-05	n.s	24,3956044	0	24,3956044	0,867624242	n.s	37,63213531	0	37,63213531	0,894627847	n.s
HOXC13	NaN	n.s	9.3924711764919e-47	lusc	49,23076923	0	49,23076923	0,826018603	n.s	92,17758985	0	92,17758985	0,037801683	n.s
HOXD11	NaN	n.s	7.84649080289831e-108	lusc	18,46153846	0	18,46153846	0,806839115	n.s	90,69767442	0	90,69767442	0,085584227	n.s
HOXD12	NaN	n.s	5.78551220867305e-55	lusc	15,82417582	0	15,82417582	0,757193007	n.s	66,5961945	0	66,5961945	0,802714298	n.s
HOXD13	NaN	n.s	1.33274570773933e-78	lusc	14,28571429	0	14,28571429	0,715728961	n.s	75,89852008	0	75,89852008	0,681441442	n.s
HRG	NaN	n.s	2.17993781533818e-29	lusc	14,50549451	0	14,50549451	0,722403114	n.s	49,26004228	0	49,26004228	0,888266964	n.s
HSD3B1	NaN	n.s	0.0670019659334171	n.s	4,175824176	0	4,175824176	0,025035949	n.s	1,902748414	0	1,902748414	0,000107006	n.s
HSD3B2	NaN	n.s	0.643872600473618	n.s	0,21978022	0	0,21978022	1,56E-14	n.s	0,634249471	0	0,634249471	3,43E-14	n.s
HTN1	NaN	n.s	3.66200511480929e-13	lusc	0,879120879	0	0,879120879	1,83E-11	n.s	13,53065539	0	13,53065539	0,650889188	n.s
HTN3	NaN	n.s	5.18027881027135e-11	lusc	0,43956044	0	0,43956044	1,56E-14	n.s	10,57082452	0	10,57082452	0,515994466	n.s
HTR1A	NaN	n.s	0.506101127225456	n.s	3,736263736	0	3,736263736	0,013285131	n.s	2,748414376	0	2,748414376	0,002687623	n.s
HTR1E	NaN	n.s	1.6003004018986e-08	lusc	5,714285714	0	5,714285714	0,111852795	n.s	17,97040169	0	17,97040169	0,75919219	n.s
HTR2C	NaN	n.s	7.62564748115052e-74	lusc	16,92307692	0	16,92307692	0,780548478	n.s	76,74418605	0	76,74418605	0,663950975	n.s
HTR5A	NaN	n.s	0.0341932162735067	n.s	1,098901099	0	1,098901099	4,22E-09	n.s	3,382663848	0	3,382663848	0,01036677	n.s
IAPP	NaN	n.s	7.47855182223149e-13	lusc	10,76923077	0	10,76923077	0,557915295	n.s	30,02114165	0	30,02114165	0,867330205	n.s
IFNA1	NaN	n.s	0.297049220063704	n.s	1,538461538	0	1,538461538	1,97E-06	n.s	2,748414376	0	2,748414376	0,002687623	n.s
IFNB1	NaN	n.s	0.773502287595601	n.s	4,395604396	0	4,395604396	0,032893993	n.s	3,805496829	0	3,805496829	0,020214634	n.s
IL17A	NaN	n.s	0.275979814988195	n.s	3,956043956	0	3,956043956	0,018624452	n.s	5,708245243	0	5,708245243	0,124564593	n.s
INS	NaN	n.s	0.00616860729985191	n.s	1,978021978	0	1,978021978	5,78E-05	n.s	0	0	0	NA	n.s
INSL4	NaN	n.s	3.37160048197482e-11	luad	26,37362637	0	26,37362637	0,879831954	n.s	9,513742072	0	9,513742072	0,447596662	n.s
PDX1	NaN	n.s	0.00767855751294644	n.s	38,68131868	0	38,68131868	0,886220482	n.s	47,56871036	0	47,56871036	0,892966866	n.s
KCNC2	NaN	n.s	3.24648922156428e-17	luad	20,65934066	0	20,65934066	0,83513673	n.s	2,748414376	0	2,748414376	0,002687623	n.s
KCNJ4	NaN	n.s	7.18714113995218e-17	lusc	5,934065934	0	5,934065934	0,130578333	n.s	26,42706131	0	26,42706131	0,847699634	n.s
KRT9	NaN	n.s	2.09945822608473e-97	lusc	5,714285714	0	5,714285714	0,111852795	n.s	73,3615222	0	73,3615222	0,725636372	n.s
KRT31	NaN	n.s	5.13512748157103e-129	lusc	4,395604396	0	4,395604396	0,032893993	n.s	83,50951374	0	83,50951374	0,449101537	n.s
KRT33A	NaN	n.s	4.9531815345662e-100	lusc	3,076923077	0	3,076923077	0,003614893	n.s	70,82452431	0	70,82452431	0,760107889	n.s
KRT33B	NaN	n.s	2.17172388100854e-31	lusc	9,010989011	0	9,010989011	0,427121179	n.s	42,91754757	0	42,91754757	0,904228558	n.s
KRT34	NaN	n.s	1.39519276155467e-93	lusc	7,252747253	0	7,252747253	0,258666905	n.s	73,78435518	0	73,78435518	0,719030388	n.s
KRT35	NaN	n.s	4.32124781374556e-21	lusc	0,43956044	0	0,43956044	1,56E-14	n.s	19,23890063	0	19,23890063	0,778927516	n.s
KRT82	NaN	n.s	1.63597945439934e-26	lusc	0,659340659	0	0,659340659	1,56E-14	n.s	24,10147992	0	24,10147992	0,831049645	n.s
KRT83	NaN	n.s	0.0684707281450059	n.s	42,85714286	0	42,85714286	0,866824369	n.s	36,78646934	0	36,78646934	0,892235019	n.s
KRT84	NaN	n.s	2.12783413509588e-47	lusc	2,637362637	0	2,637362637	0,001049743	n.s	42,91754757	0	42,91754757	0,904228558	n.s
LECT2	NaN	n.s	1.58745749786876e-23	lusc	2,857142857	0	2,857142857	0,002066819	n.s	26,42706131	0	26,42706131	0,847699634	n.s
LGALS7	NaN	n.s	1.51281023360762e-63	lusc	8,131868132	0	8,131868132	0,346388763	n.s	61,09936575	0	61,09936575	0,840559763	n.s
LHX1	NaN	n.s	0.0761538605720516	n.s	29,23076923	0	29,23076923	0,893595099	n.s	34,88372093	0	34,88372093	0,886363627	n.s
LIPB	NaN	n.s	0.0391367851107333	n.s	7,252747253	0	7,252747253	0,258666905	n.s	11,41649049	0	11,41649049	0,562202164	n.s
LOR	NaN	n.s	1.10581126219432e-27	lusc	1,098901099	0	1,098901099	4,22E-09	n.s	26,00422833	0	26,00422833	0,844946821	n.s
MAGEA1	NaN	n.s	3.24002040795719e-25	lusc	17,58241758	0	17,58241758	0,792617318	n.s	50,10570825	0	50,10570825	0,885773608	n.s
MAGEA2	NaN	n.s	6.93978500512204e-08	lusc	10,76923077	0	10,76923077	0,557915295	n.s	24,5243129	0	24,5243129	0,834371761	n.s
MAGEA3	NaN	n.s	1.04717145813164e-19	lusc	30,32967033	0	30,32967033	0,897970822	n.s	60,25369979	0	60,25369979	0,84518854	n.s
MAGEA4	NaN	n.s	4.24298845802768e-65	lusc	11,64835165	0	11,64835165	0,608425629	n.s	66,5961945	0	66,5961945	0,802714298	n.s
MAGEA5	NaN	n.s	1.09195799308775e-24	lusc	13,84615385	0	13,84615385	0,701507023	n.s	44,82029598	0	44,82029598	0,899886406	n.s
MAGEA6	NaN	n.s	5.64593373979478e-24	lusc	26,15384615	0	26,15384615	0,878600412	n.s	59,19661734	0	59,19661734	0,85062772	n.s
MAGEA10	NaN	n.s	2.26820298722292e-23	lusc	14,94505495	0	14,94505495	0,734949671	n.s	45,24312896	0	45,24312896	0,898874356	n.s
MAGEA11	NaN	n.s	6.39659039920145e-60	lusc	11,86813187	0	11,86813187	0,619704692	n.s	64,27061311	0	64,27061311	0,820601296	n.s
MAGEA12	NaN	n.s	3.53442831033994e-06	n.s	22,63736264	0	22,63736264	0,854206578	n.s	36,78646934	0	36,78646934	0,892235019	n.s
MAGEB1	NaN	n.s	0.00396117986563435	n.s	12,30769231	0	12,30769231	0,640801001	n.s	19,45031712	0	19,45031712	0,78189862	n.s
MAGEB2	NaN	n.s	5.44515709340732e-18	lusc	11,64835165	0	11,64835165	0,608425629	n.s	36,15221987	0	36,15221987	0,89035656	n.s
MAGEB3	NaN	n.s	2.47797950248584e-07	lusc	1,098901099	0	1,098901099	4,22E-09	n.s	8,66807611	0	8,66807611	0,383784797	n.s
MAGEB4	NaN	n.s	0.0108377313339474	n.s	0,21978022	0	0,21978022	1,56E-14	n.s	2,325581395	0	2,325581395	0,000721163	n.s
MBL2	NaN	n.s	0.705247524529774	n.s	1,758241758	0	1,758241758	1,33E-05	n.s	2,325581395	0	2,325581395	0,000721163	n.s
MC2R	NaN	n.s	3.35604943679146e-05	n.s	6,813186813	0	6,813186813	0,214226	n.s	1,268498943	0	1,268498943	4,87E-07	n.s
MC3R	NaN	n.s	3.72164923951403e-08	lusc	2,417582418	0	2,417582418	0,000478719	n.s	12,05073996	0	12,05073996	0,592467909	n.s
MC5R	NaN	n.s	0.223860834789619	n.s	10,32967033	0	10,32967033	0,529123074	n.s	7,822410148	0	7,822410148	0,312472118	n.s
SMCP	NaN	n.s	3.00077481463696e-42	lusc	0,43956044	0	0,43956044	1,56E-14	n.s	35,09513742	0	35,09513742	0,887052233	n.s
SCGB2A2	NaN	n.s	0.999999999999998	n.s	3,296703297	0	3,296703297	0,005883465	n.s	3,171247357	0	3,171247357	0,007090406	n.s
MOS	NaN	n.s	0.0603891690145342	n.s	0,879120879	0	0,879120879	1,83E-11	n.s	2,748414376	0	2,748414376	0,002687623	n.s
MT1B	NaN	n.s	0.0671183888119863	n.s	1,538461538	0	1,538461538	1,97E-06	n.s	0,21141649	0	0,21141649	2,24E-14	n.s
MTNR1A	NaN	n.s	6.07566404292614e-16	luad	34,06593407	0	34,06593407	0,903073203	n.s	11,62790698	0	11,62790698	0,572683649	n.s
MTNR1B	NaN	n.s	0.00407445296811814	n.s	2,417582418	0	2,417582418	0,000478719	n.s	6,553911205	0	6,553911205	0,19762874	n.s
MUC7	NaN	n.s	0.0181239547547457	n.s	2,417582418	0	2,417582418	0,000478719	n.s	5,708245243	0	5,708245243	0,124564593	n.s
MYF6	NaN	n.s	0.135510273478307	n.s	3,956043956	0	3,956043956	0,018624452	n.s	6,342494715	0	6,342494715	0,178662404	n.s
MYH4	NaN	n.s	0.855497938826656	n.s	4,395604396	0	4,395604396	0,032893993	n.s	4,862579281	0	4,862579281	0,064318205	n.s
MYH6	NaN	n.s	0.123618269404767	n.s	23,07692308	0	23,07692308	0,857830286	n.s	27,69556025	0	27,69556025	0,855340762	n.s
MYH7	NaN	n.s	0.418685611634228	n.s	7,692307692	0	7,692307692	0,303063289	n.s	6,131078224	0	6,131078224	0,160067562	n.s
MYOD1	NaN	n.s	2.5165963240512e-40	lusc	1,978021978	0	1,978021978	5,78E-05	n.s	36,99788584	0	36,99788584	0,892844877	n.s
MYOG	NaN	n.s	0.0304272189955915	n.s	0,43956044	0	0,43956044	1,56E-14	n.s	2,325581395	0	2,325581395	0,000721163	n.s
NEU2	NaN	n.s	1.82759653848065e-06	n.s	2,197802198	0	2,197802198	0,00018585	n.s	9,936575053	0	9,936575053	0,476451783	n.s
NEUROG1	NaN	n.s	4.64362776278634e-16	lusc	0,43956044	0	0,43956044	1,56E-14	n.s	15,01057082	0	15,01057082	0,695912696	n.s
NKX2-2	NaN	n.s	4.59528733094372e-06	n.s	9,67032967	0	9,67032967	0,481112045	n.s	20,71881607	0	20,71881607	0,798114318	n.s
NPPB	NaN	n.s	0.359219309997379	n.s	7,032967033	0	7,032967033	0,236376804	n.s	8,8794926	0	8,8794926	0,400489398	n.s
NPY2R	NaN	n.s	0.00665779756069787	n.s	0,879120879	0	0,879120879	1,83E-11	n.s	3,805496829	0	3,805496829	0,020214634	n.s
ODF1	NaN	n.s	0.717369520659788	n.s	0,43956044	0	0,43956044	1,56E-14	n.s	0,845665962	0	0,845665962	1,42E-10	n.s
OPRM1	NaN	n.s	0.00292824410103614	n.s	8,131868132	0	8,131868132	0,346388763	n.s	3,382663848	0	3,382663848	0,01036677	n.s
SIX6	NaN	n.s	0.00033225987725633	n.s	7,032967033	0	7,032967033	0,236376804	n.s	14,58773784	0	14,58773784	0,684184996	n.s
OR1F1	NaN	n.s	1.04308491600187e-12	lusc	12,08791209	0	12,08791209	0,630489081	n.s	31,71247357	0	31,71247357	0,874735223	n.s
OR3A1	NaN	n.s	0.595094102684553	n.s	2,637362637	0	2,637362637	0,001049743	n.s	1,902748414	0	1,902748414	0,000107006	n.s
OTX2	NaN	n.s	1.07886609897338e-27	lusc	5,714285714	0	5,714285714	0,111852795	n.s	34,88372093	0	34,88372093	0,886363627	n.s
REG3A	NaN	n.s	0.0267235738465576	n.s	4,395604396	0	4,395604396	0,032893993	n.s	1,691331924	0	1,691331924	2,85E-05	n.s
PAX2	NaN	n.s	8.06489220739163e-15	lusc	4,175824176	0	4,175824176	0,025035949	n.s	21,56448203	0	21,56448203	0,807587006	n.s
PAX3	NaN	n.s	1.43761636253726e-38	lusc	10,10989011	0	10,10989011	0,513776038	n.s	49,47145877	0	49,47145877	0,887653018	n.s
PAX4	NaN	n.s	0.921666604032384	n.s	2,857142857	0	2,857142857	0,002066819	n.s	2,536997886	0	2,536997886	0,00146747	n.s
PAX7	NaN	n.s	0.863087338297537	n.s	25,71428571	0	25,71428571	0,876049929	n.s	26,42706131	0	26,42706131	0,847699634	n.s
PBG1	NaN	n.s	0.271267927337334	n.s	9,010989011	0	9,010989011	0,427121179	n.s	11,41649049	0	11,41649049	0,562202164	n.s
PCDH8	NaN	n.s	0.0484957105723959	n.s	17,8021978	0	17,8021978	0,79636063	n.s	23,25581395	0	23,25581395	0,823945926	n.s
SERPINA4	NaN	n.s	6.78310185627976e-11	luad	44,3956044	0	44,3956044	0,858401269	n.s	23,89006342	0	23,89006342	0,829333015	n.s
PKLR	NaN	n.s	1.89780442212267e-06	n.s	6,153846154	0	6,153846154	0,150368874	n.s	16,27906977	0	16,27906977	0,726603479	n.s
PNLIP	NaN	n.s	0.999999999999998	n.s	0,659340659	0	0,659340659	1,56E-14	n.s	0,845665962	0	0,845665962	1,42E-10	n.s
PNLIPRP1	NaN	n.s	0.772663807571379	n.s	6,813186813	0	6,813186813	0,214226	n.s	6,131078224	0	6,131078224	0,160067562	n.s
PNLIPRP2	NaN	n.s	0.00847386209064589	n.s	1,318681319	0	1,318681319	1,51E-07	n.s	4,4397463	0	4,4397463	0,041843083	n.s
POU3F3	NaN	n.s	3.0757129846293e-08	lusc	7,032967033	0	7,032967033	0,236376804	n.s	19,66173362	0	19,66173362	0,78478807	n.s
POU3F4	NaN	n.s	0.000598391098191698	n.s	1,318681319	0	1,318681319	1,51E-07	n.s	5,708245243	0	5,708245243	0,124564593	n.s
POU4F2	NaN	n.s	0.00321676163433293	n.s	2,197802198	0	2,197802198	0,00018585	n.s	6,342494715	0	6,342494715	0,178662404	n.s
PPP1R3A	NaN	n.s	0.681612164319559	n.s	1,098901099	0	1,098901099	4,22E-09	n.s	0,634249471	0	0,634249471	3,43E-14	n.s
PRB1	NaN	n.s	2.25947950540665e-05	n.s	4,615384615	0	4,615384615	0,042148145	n.s	12,68498943	0	12,68498943	0,619423753	n.s
PRB4	NaN	n.s	0.1446792764871	n.s	4,175824176	0	4,175824176	0,025035949	n.s	6,553911205	0	6,553911205	0,19762874	n.s
TMPRSS15	NaN	n.s	3.83662782226764e-11	lusc	12,52747253	0	12,52747253	0,650662248	n.s	30,65539112	0	30,65539112	0,870221665	n.s
PSG3	NaN	n.s	0.0276575598033165	n.s	13,40659341	0	13,40659341	0,686015395	n.s	8,66807611	0	8,66807611	0,383784797	n.s
PSG4	NaN	n.s	6.82215605490342e-35	lusc	7,692307692	0	7,692307692	0,303063289	n.s	43,34038055	0	43,34038055	0,903292355	n.s
PSG5	NaN	n.s	6.91925169856942e-32	lusc	7,692307692	0	7,692307692	0,303063289	n.s	41,22621564	0	41,22621564	0,903577156	n.s
PSG6	NaN	n.s	0.0466430852254938	n.s	7,912087912	0	7,912087912	0,324912763	n.s	12,05073996	0	12,05073996	0,592467909	n.s
PSG7	NaN	n.s	0.00392581061924023	n.s	1,098901099	0	1,098901099	4,22E-09	n.s	4,4397463	0	4,4397463	0,041843083	n.s
PSG9	NaN	n.s	1.66236024366009e-10	lusc	9,67032967	0	9,67032967	0,481112045	n.s	26,00422833	0	26,00422833	0,844946821	n.s
PSG11	NaN	n.s	0.00230558681196215	n.s	1,318681319	0	1,318681319	1,51E-07	n.s	5,073995772	0	5,073995772	0,077701469	n.s
TAS2R38	NaN	n.s	4.0087933222771e-32	lusc	15,6043956	0	15,6043956	0,751959027	n.s	52,64270613	0	52,64270613	0,877640423	n.s
PTH	NaN	n.s	0.0146042311748898	n.s	5,274725275	0	5,274725275	0,078285304	n.s	9,725158562	0	9,725158562	0,46227847	n.s
RAG2	NaN	n.s	0.144948879438263	n.s	2,637362637	0	2,637362637	0,001049743	n.s	4,651162791	0	4,651162791	0,052230559	n.s
RBMY1A1	NaN	n.s	0.00427291117753751	n.s	0,43956044	0	0,43956044	1,56E-14	n.s	3,171247357	0	3,171247357	0,007090406	n.s
REG1A	NaN	n.s	3.23818879356805e-05	n.s	14,94505495	0	14,94505495	0,734949671	n.s	26,21564482	0	26,21564482	0,846336979	n.s
REG1B	NaN	n.s	0.0337875864315149	n.s	3,296703297	0	3,296703297	0,005883465	n.s	1,057082452	0	1,057082452	1,96E-08	n.s
RFPL1	NaN	n.s	5.7475599017711e-15	lusc	2,417582418	0	2,417582418	0,000478719	n.s	18,39323467	0	18,39323467	0,766159003	n.s
RPE65	NaN	n.s	3.93029855942613e-20	lusc	3,296703297	0	3,296703297	0,005883465	n.s	24,5243129	0	24,5243129	0,834371761	n.s
SEMG1	NaN	n.s	0.540826069814689	n.s	0,659340659	0	0,659340659	1,56E-14	n.s	1,268498943	0	1,268498943	4,87E-07	n.s
SEMG2	NaN	n.s	0.643872600473618	n.s	0,21978022	0	0,21978022	1,56E-14	n.s	0,634249471	0	0,634249471	3,43E-14	n.s
SHOX	NaN	n.s	0.00229932077178855	n.s	0,21978022	0	0,21978022	1,56E-14	n.s	2,959830867	0	2,959830867	0,004544091	n.s
SI	NaN	n.s	0.307533769398661	n.s	6,153846154	0	6,153846154	0,150368874	n.s	4,4397463	0	4,4397463	0,041843083	n.s
SIM1	NaN	n.s	0.000363074603399746	n.s	21,97802198	0	21,97802198	0,848385243	n.s	12,89640592	0	12,89640592	0,627742091	n.s
SLC2A2	NaN	n.s	0.00833700856929277	n.s	11,20879121	0	11,20879121	0,584293685	n.s	6,131078224	0	6,131078224	0,160067562	n.s
SLC13A1	NaN	n.s	0.999999999999998	n.s	0,659340659	0	0,659340659	1,56E-14	n.s	0,845665962	0	0,845665962	1,42E-10	n.s
SLC18A3	NaN	n.s	2.59200707213203e-45	lusc	15,16483516	0	15,16483516	0,740848619	n.s	60,46511628	0	60,46511628	0,844055409	n.s
SLC22A2	NaN	n.s	0.0224973499513638	n.s	1,098901099	0	1,098901099	4,22E-09	n.s	3,594080338	0	3,594080338	0,014796286	n.s
SOX1	NaN	n.s	4.01034905749444e-06	n.s	11,20879121	0	11,20879121	0,584293685	n.s	22,83298097	0	22,83298097	0,820143366	n.s
SOX3	NaN	n.s	0.000720605095767345	n.s	10,76923077	0	10,76923077	0,557915295	n.s	4,651162791	0	4,651162791	0,052230559	n.s
SPP2	NaN	n.s	4.82109600587183e-56	luad	60,43956044	0	60,43956044	0,693009318	n.s	10,78224101	0	10,78224101	0,528218081	n.s
SPRR2B	NaN	n.s	2.1321346078915e-58	lusc	1,098901099	0	1,098901099	4,22E-09	n.s	46,7230444	0	46,7230444	0,895184894	n.s
SSTR5	NaN	n.s	5.61281199683917e-08	lusc	16,92307692	0	16,92307692	0,780548478	n.s	32,55813953	0	32,55813953	0,87809682	n.s
SSX1	NaN	n.s	0.359201816590549	n.s	14,50549451	0	14,50549451	0,722403114	n.s	16,91331924	0	16,91331924	0,739799215	n.s
SSX2	NaN	n.s	0.705247524529774	n.s	1,758241758	0	1,758241758	1,33E-05	n.s	2,325581395	0	2,325581395	0,000721163	n.s
SSX5	NaN	n.s	0.00174110399453217	n.s	7,472527473	0	7,472527473	0,280941555	n.s	2,748414376	0	2,748414376	0,002687623	n.s
STATH	NaN	n.s	5.13401036802499e-22	lusc	2,197802198	0	2,197802198	0,00018585	n.s	23,89006342	0	23,89006342	0,829333015	n.s
SULT2A1	NaN	n.s	0.0618110452668037	n.s	2,197802198	0	2,197802198	0,00018585	n.s	4,651162791	0	4,651162791	0,052230559	n.s
SYCP1	NaN	n.s	2.62435248612138e-13	lusc	2,417582418	0	2,417582418	0,000478719	n.s	16,91331924	0	16,91331924	0,739799215	n.s
TBXT	NaN	n.s	1.60865372836166e-25	luad	38,02197802	0	38,02197802	0,888888804	n.s	8,8794926	0	8,8794926	0,400489398	n.s
SERPINA7	NaN	n.s	0.000430862644643699	n.s	6,813186813	0	6,813186813	0,214226	n.s	1,902748414	0	1,902748414	0,000107006	n.s
TCP10	NaN	n.s	0.0179034038864211	n.s	0,659340659	0	0,659340659	1,56E-14	n.s	2,959830867	0	2,959830867	0,004544091	n.s
TECTB	NaN	n.s	4.02327881037709e-06	n.s	6,373626374	0	6,373626374	0,171035397	n.s	0,634249471	0	0,634249471	3,43E-14	n.s
TERT	NaN	n.s	6.42237174548358e-14	lusc	57,36263736	0	57,36263736	0,740847097	n.s	80,33826638	0	80,33826638	0,569055967	n.s
TFF2	NaN	n.s	0.319595231974434	n.s	21,75824176	0	21,75824176	0,846333698	n.s	24,73572939	0	24,73572939	0,835979562	n.s
NR2E1	NaN	n.s	0.0186726417570846	n.s	35,16483516	0	35,16483516	0,899422085	n.s	42,91754757	0	42,91754757	0,904228558	n.s
TPTE	NaN	n.s	0.195959709814906	n.s	12,08791209	0	12,08791209	0,630489081	n.s	15,22198732	0	15,22198732	0,70147482	n.s
TRHR	NaN	n.s	0.284714318124561	n.s	2,197802198	0	2,197802198	0,00018585	n.s	3,594080338	0	3,594080338	0,014796286	n.s
TRPC5	NaN	n.s	0.622009846065828	n.s	3,296703297	0	3,296703297	0,005883465	n.s	2,536997886	0	2,536997886	0,00146747	n.s
TSPY1	NaN	n.s	0.00407445296811814	n.s	2,417582418	0	2,417582418	0,000478719	n.s	6,553911205	0	6,553911205	0,19762874	n.s
TUBA3C	NaN	n.s	0.112709476992365	n.s	8,351648352	0	8,351648352	0,367407569	n.s	5,496828753	0	5,496828753	0,107949818	n.s
TYR	NaN	n.s	0.0259120118126071	n.s	1,978021978	0	1,978021978	5,78E-05	n.s	4,862579281	0	4,862579281	0,064318205	n.s
UGT2B10	NaN	n.s	0.0126405573609063	n.s	8,131868132	0	8,131868132	0,346388763	n.s	4,016913319	0	4,016913319	0,026653234	n.s
UMOD	NaN	n.s	0.999999999999998	n.s	0,21978022	0	0,21978022	1,56E-14	n.s	0,21141649	0	0,21141649	2,24E-14	n.s
VPREB1	NaN	n.s	0.568406209287654	n.s	2,197802198	0	2,197802198	0,00018585	n.s	1,479915433	0	1,479915433	5,05E-06	n.s
ZAN	NaN	n.s	1.05990694583651e-30	lusc	5,274725275	0	5,274725275	0,078285304	n.s	36,36363636	0	36,36363636	0,89099103	n.s
ZIC3	NaN	n.s	5.73002448872758e-12	lusc	12,96703297	0	12,96703297	0,669117069	n.s	32,13530655	0	32,13530655	0,876442176	n.s
NPHS2	NaN	n.s	0.0255487379075589	n.s	0,879120879	0	0,879120879	1,83E-11	n.s	3,171247357	0	3,171247357	0,007090406	n.s
OR2H2	NaN	n.s	6.20371992503922e-05	n.s	4,835164835	0	4,835164835	0,052352371	n.s	12,47357294	0	12,47357294	0,610781478	n.s
LHX3	NaN	n.s	1.05079861697766e-05	n.s	7,692307692	0	7,692307692	0,303063289	n.s	17,54756871	0	17,54756871	0,751792727	n.s
CSRP3	NaN	n.s	0.0315559486658727	n.s	4,615384615	0	4,615384615	0,042148145	n.s	1,902748414	0	1,902748414	0,000107006	n.s
HIST3H3	NaN	n.s	0.764713004071307	n.s	3,076923077	0	3,076923077	0,003614893	n.s	2,536997886	0	2,536997886	0,00146747	n.s
HIST1H2AJ	NaN	n.s	7.22988521269437e-13	lusc	18,46153846	0	18,46153846	0,806839115	n.s	40,16913319	0	40,16913319	0,901129785	n.s
HIST1H2AL	NaN	n.s	3.03169558922893e-11	lusc	20,43956044	0	20,43956044	0,832690821	n.s	40,80338266	0	40,80338266	0,902615001	n.s
HIST1H2AB	NaN	n.s	2.00240700181755e-05	n.s	12,30769231	0	12,30769231	0,640801001	n.s	23,25581395	0	23,25581395	0,823945926	n.s
HIST1H2BM	NaN	n.s	9.05576210066737e-16	lusc	15,82417582	0	15,82417582	0,757193007	n.s	39,74630021	0	39,74630021	0,900110424	n.s
HIST1H2BI	NaN	n.s	1.87047991009083e-12	lusc	11,20879121	0	11,20879121	0,584293685	n.s	30,23255814	0	30,23255814	0,868310212	n.s
HIST1H3C	NaN	n.s	5.59649182222227e-14	lusc	25,71428571	0	25,71428571	0,876049929	n.s	49,89429175	0	49,89429175	0,886406441	n.s
HIST1H3I	NaN	n.s	0.0825662461104441	n.s	7,472527473	0	7,472527473	0,280941555	n.s	10,99365751	0	10,99365751	0,539984328	n.s
HIST1H3J	NaN	n.s	2.13720301895131e-06	n.s	34,50549451	0	34,50549451	0,901637337	n.s	50,10570825	0	50,10570825	0,885773608	n.s
HIST1H3B	NaN	n.s	5.4453095195986e-18	lusc	25,49450549	0	25,49450549	0,874729016	n.s	53,48837209	0	53,48837209	0,874686123	n.s
HIST1H4A	NaN	n.s	0.75966807312132	n.s	10,32967033	0	10,32967033	0,529123074	n.s	9,513742072	0	9,513742072	0,447596662	n.s
HIST1H4F	NaN	n.s	0.999999999999999	n.s	2,197802198	0	2,197802198	0,00018585	n.s	2,114164905	0	2,114164905	0,000303668	n.s
HIST1H4B	NaN	n.s	0.000104818873543878	n.s	13,18681319	0	13,18681319	0,677751136	n.s	23,25581395	0	23,25581395	0,823945926	n.s
HIST1H4L	NaN	n.s	0.700790653101772	n.s	5,934065934	0	5,934065934	0,130578333	n.s	6,765327696	0	6,765327696	0,216832269	n.s
SOX14	NaN	n.s	0.00641240481100103	n.s	18,46153846	0	18,46153846	0,806839115	n.s	11,83932347	0	11,83932347	0,582767146	n.s
GALR3	NaN	n.s	9.88762122401551e-12	lusc	12,52747253	0	12,52747253	0,650662248	n.s	31,28964059	0	31,28964059	0,872973384	n.s
LIPF	NaN	n.s	0.475959256226051	n.s	2,197802198	0	2,197802198	0,00018585	n.s	3,171247357	0	3,171247357	0,007090406	n.s
TMEFF1	NaN	n.s	1.52472310035733e-19	lusc	16,26373626	0	16,26373626	0,767070301	n.s	43,76321353	0	43,76321353	0,902340131	n.s
OR6A2	NaN	n.s	0.953362392512315	n.s	1,098901099	0	1,098901099	4,22E-09	n.s	0,845665962	0	0,845665962	1,42E-10	n.s
KRT38	NaN	n.s	4.39319629749085e-20	lusc	6,813186813	0	6,813186813	0,214226	n.s	30,65539112	0	30,65539112	0,870221665	n.s
KRT37	NaN	n.s	1.41140961056991e-58	lusc	2,637362637	0	2,637362637	0,001049743	n.s	49,68287526	0	49,68287526	0,887032877	n.s
PAGE1	NaN	n.s	0.99655557612201	n.s	10,76923077	0	10,76923077	0,557915295	n.s	10,99365751	0	10,99365751	0,539984328	n.s
ADAM18	NaN	n.s	0.291390470178225	n.s	11,86813187	0	11,86813187	0,619704692	n.s	9,513742072	0	9,513742072	0,447596662	n.s
ADAM7	NaN	n.s	1.56781160821777e-06	n.s	6,373626374	0	6,373626374	0,171035397	n.s	16,70190275	0	16,70190275	0,735541931	n.s
AKAP4	NaN	n.s	0.261381200708812	n.s	0	0	0	NA	n.s	0,634249471	0	0,634249471	3,43E-14	n.s
PHOX2B	NaN	n.s	2.37046913856005e-09	luad	18,02197802	0	18,02197802	0,79997482	n.s	5,285412262	0	5,285412262	0,092284465	n.s
HIST1H3F	NaN	n.s	9.60963444260872e-45	lusc	20,43956044	0	20,43956044	0,832690821	n.s	66,38477801	0	66,38477801	0,804476715	n.s
TM4SF5	NaN	n.s	1.28649751497338e-25	luad	32,52747253	0	32,52747253	0,905554575	n.s	5,496828753	0	5,496828753	0,107949818	n.s
KRT75	NaN	n.s	5.33882020960458e-81	lusc	10,32967033	0	10,32967033	0,529123074	n.s	72,30443975	0	72,30443975	0,741010049	n.s
SLC6A5	NaN	n.s	0.98451350444723	n.s	0,21978022	0	0,21978022	1,56E-14	n.s	0	0	0	NA	n.s
HTR3B	NaN	n.s	0.530422801237106	n.s	10,32967033	0	10,32967033	0,529123074	n.s	11,83932347	0	11,83932347	0,582767146	n.s
GCM2	NaN	n.s	0.104551119776383	n.s	1,978021978	0	1,978021978	5,78E-05	n.s	4,016913319	0	4,016913319	0,026653234	n.s
GPR50	NaN	n.s	4.92841736571118e-58	lusc	9,450549451	0	9,450549451	0,463779977	n.s	60,0422833	0	60,0422833	0,846306167	n.s
PIWIL1	NaN	n.s	0.0147528478314421	n.s	23,07692308	0	23,07692308	0,857830286	n.s	16,49048626	0	16,49048626	0,731145403	n.s
MMP20	NaN	n.s	8.27208917055894e-17	lusc	10,76923077	0	10,76923077	0,557915295	n.s	33,82663848	0	33,82663848	0,882770394	n.s
CER1	NaN	n.s	0.829621935431805	n.s	3,736263736	0	3,736263736	0,013285131	n.s	4,22832981	0	4,22832981	0,033934328	n.s
SLC22A6	NaN	n.s	0.462054021626022	n.s	0,43956044	0	0,43956044	1,56E-14	n.s	0	0	0	NA	n.s
ADIPOQ	NaN	n.s	0.284714318124561	n.s	2,197802198	0	2,197802198	0,00018585	n.s	3,594080338	0	3,594080338	0,014796286	n.s
NCR2	NaN	n.s	0.999999999999998	n.s	3,296703297	0	3,296703297	0,005883465	n.s	3,382663848	0	3,382663848	0,01036677	n.s
CARTPT	NaN	n.s	0.393372234424481	n.s	0,21978022	0	0,21978022	1,56E-14	n.s	0,845665962	0	0,845665962	1,42E-10	n.s
TCL1B	NaN	n.s	0.00373001939377018	n.s	1,978021978	0	1,978021978	5,78E-05	n.s	5,919661734	0	5,919661734	0,141986149	n.s
GUCA1C	NaN	n.s	8.37647377206243e-11	lusc	0,879120879	0	0,879120879	1,83E-11	n.s	11,41649049	0	11,41649049	0,562202164	n.s
MAGEC1	NaN	n.s	0.000225370719332499	n.s	24,3956044	0	24,3956044	0,867624242	n.s	35,72938689	0	35,72938689	0,889061784	n.s
FGF19	NaN	n.s	0.000332985581070622	n.s	32,30769231	0	32,30769231	0,904857847	n.s	43,97463002	0	43,97463002	0,901857868	n.s
CST8	NaN	n.s	1.66814374506385e-20	lusc	1,098901099	0	1,098901099	4,22E-09	n.s	20,29598309	0	20,29598309	0,792996833	n.s
SLC17A4	NaN	n.s	1.39813578739109e-11	luad	13,62637363	0	13,62637363	0,693928181	n.s	1,691331924	0	1,691331924	2,85E-05	n.s
HHLA1	NaN	n.s	0.00101810616853168	n.s	4,175824176	0	4,175824176	0,025035949	n.s	9,936575053	0	9,936575053	0,476451783	n.s
CELA3A	NaN	n.s	0.466286711633138	n.s	1,318681319	0	1,318681319	1,51E-07	n.s	0,634249471	0	0,634249471	3,43E-14	n.s
CLEC3A	NaN	n.s	0.20397623657189	n.s	6,813186813	0	6,813186813	0,214226	n.s	9,302325581	0	9,302325581	0,432403301	n.s
SSX3	NaN	n.s	0.901536072116944	n.s	2,197802198	0	2,197802198	0,00018585	n.s	2,536997886	0	2,536997886	0,00146747	n.s
SLC17A2	NaN	n.s	0.0752851453123511	n.s	4,395604396	0	4,395604396	0,032893993	n.s	2,114164905	0	2,114164905	0,000303668	n.s
GLYAT	NaN	n.s	0.237491622022908	n.s	0,21978022	0	0,21978022	1,56E-14	n.s	1,057082452	0	1,057082452	1,96E-08	n.s
CACNG3	NaN	n.s	0.330547845305545	n.s	2,857142857	0	2,857142857	0,002066819	n.s	1,691331924	0	1,691331924	2,85E-05	n.s
CACNG2	NaN	n.s	3.59897660638658e-06	n.s	2,857142857	0	2,857142857	0,002066819	n.s	10,78224101	0	10,78224101	0,528218081	n.s
SPAG11B	NaN	n.s	0.622009846065828	n.s	3,296703297	0	3,296703297	0,005883465	n.s	2,536997886	0	2,536997886	0,00146747	n.s
MYCNOS	NaN	n.s	0.542485049412103	n.s	16,04395604	0	16,04395604	0,762226836	n.s	17,7589852	0	17,7589852	0,755548798	n.s
HOXB13	NaN	n.s	1.27736095017483e-15	lusc	42,41758242	0	42,41758242	0,86909251	n.s	68,71035941	0	68,71035941	0,783322572	n.s
SLCO1B1	NaN	n.s	2.61893361844238e-14	lusc	29,23076923	0	29,23076923	0,893595099	n.s	54,12262156	0	54,12262156	0,872381596	n.s
FUT9	NaN	n.s	8.98238677109869e-05	n.s	43,95604396	0	43,95604396	0,860887915	n.s	31,28964059	0	31,28964059	0,872973384	n.s
TBR1	NaN	n.s	0.331821747156806	n.s	17,8021978	0	17,8021978	0,79636063	n.s	15,22198732	0	15,22198732	0,70147482	n.s
SLC22A7	NaN	n.s	0.000296588947198628	n.s	1,978021978	0	1,978021978	5,78E-05	n.s	7,188160677	0	7,188160677	0,25546501	n.s
EDDM3A	NaN	n.s	1.44213000462622e-06	n.s	7,252747253	0	7,252747253	0,258666905	n.s	0,845665962	0	0,845665962	1,42E-10	n.s
CFHR4	NaN	n.s	1.68498712763539e-34	lusc	15,82417582	0	15,82417582	0,757193007	n.s	54,54545455	0	54,54545455	0,87080069	n.s
SMR3B	NaN	n.s	0.165921125762909	n.s	0,659340659	0	0,659340659	1,56E-14	n.s	1,902748414	0	1,902748414	0,000107006	n.s
UGT2A1	NaN	n.s	1.84187381369879e-22	lusc	3,076923077	0	3,076923077	0,003614893	n.s	26,00422833	0	26,00422833	0,844946821	n.s
VAX1	NaN	n.s	4.55745527412726e-66	lusc	13,84615385	0	13,84615385	0,701507023	n.s	69,76744186	0	69,76744186	0,772254087	n.s
PRDM7	NaN	n.s	0.0323359173776371	n.s	6,373626374	0	6,373626374	0,171035397	n.s	3,171247357	0	3,171247357	0,007090406	n.s
HRH3	NaN	n.s	0.773616471062693	n.s	6,373626374	0	6,373626374	0,171035397	n.s	5,708245243	0	5,708245243	0,124564593	n.s
CYP4F8	NaN	n.s	2.15649649446202e-09	lusc	4,615384615	0	4,615384615	0,042148145	n.s	17,12473573	0	17,12473573	0,743923108	n.s
CELA3B	NaN	n.s	0.682586333204779	n.s	1,538461538	0	1,538461538	1,97E-06	n.s	2,114164905	0	2,114164905	0,000303668	n.s
OTP	NaN	n.s	0.999999999999998	n.s	0,21978022	0	0,21978022	1,56E-14	n.s	0,21141649	0	0,21141649	2,24E-14	n.s
CASP14	NaN	n.s	2.28133555343261e-22	lusc	7,472527473	0	7,472527473	0,280941555	n.s	33,61522199	0	33,61522199	0,882020111	n.s
NTSR2	NaN	n.s	7.62962671954813e-06	n.s	6,813186813	0	6,813186813	0,214226	n.s	16,49048626	0	16,49048626	0,731145403	n.s
AIPL1	NaN	n.s	2.00043986744719e-05	n.s	1,978021978	0	1,978021978	5,78E-05	n.s	8,456659619	0	8,456659619	0,36660228	n.s
POTEH	NaN	n.s	5.07400462901889e-05	n.s	2,857142857	0	2,857142857	0,002066819	n.s	9,513742072	0	9,513742072	0,447596662	n.s
HYPM	NaN	n.s	6.75255529040804e-09	lusc	1,098901099	0	1,098901099	4,22E-09	n.s	10,14799154	0	10,14799154	0,490122766	n.s
GSTT4	NaN	n.s	0.000640217006585298	n.s	0,879120879	0	0,879120879	1,83E-11	n.s	4,862579281	0	4,862579281	0,064318205	n.s
OR1J4	NaN	n.s	3.01900151534282e-11	lusc	11,20879121	0	11,20879121	0,584293685	n.s	28,9640592	0	28,9640592	0,862169994	n.s
LCE2B	NaN	n.s	3.41438832160533e-12	lusc	0,43956044	0	0,43956044	1,56E-14	n.s	11,62790698	0	11,62790698	0,572683649	n.s
OPTC	NaN	n.s	0.0116936014525689	n.s	4,835164835	0	4,835164835	0,052352371	n.s	1,691331924	0	1,691331924	2,85E-05	n.s
IL1RAPL2	NaN	n.s	0.0301367937185263	n.s	53,84615385	0	53,84615385	0,783739346	n.s	61,09936575	0	61,09936575	0,840559763	n.s
CLDN17	NaN	n.s	1.28091896423597e-36	lusc	0,21978022	0	0,21978022	1,56E-14	n.s	30,65539112	0	30,65539112	0,870221665	n.s
FGF21	NaN	n.s	3.25555523515657e-06	n.s	8,131868132	0	8,131868132	0,346388763	n.s	18,81606765	0	18,81606765	0,772727163	n.s
GAPDHS	NaN	n.s	0.100162245809998	n.s	6,373626374	0	6,373626374	0,171035397	n.s	9,513742072	0	9,513742072	0,447596662	n.s
OR10G2	NaN	n.s	9.28452785789005e-05	n.s	6,373626374	0	6,373626374	0,171035397	n.s	1,268498943	0	1,268498943	4,87E-07	n.s
OR10H1	NaN	n.s	0.0223116955498481	n.s	19,78021978	0	19,78021978	0,824885539	n.s	13,95348837	0	13,95348837	0,664941562	n.s
VCX	NaN	n.s	5.72934521276801e-38	lusc	19,34065934	0	19,34065934	0,819257509	n.s	61,09936575	0	61,09936575	0,840559763	n.s
OR7C1	NaN	n.s	4.09588274523914e-31	lusc	5,714285714	0	5,714285714	0,111852795	n.s	37,42071882	0	37,42071882	0,894041135	n.s
SMR3A	NaN	n.s	0.250655867816392	n.s	0,659340659	0	0,659340659	1,56E-14	n.s	1,691331924	0	1,691331924	2,85E-05	n.s
FETUB	NaN	n.s	8.98047323774991e-55	lusc	11,20879121	0	11,20879121	0,584293685	n.s	60,67653277	0	60,67653277	0,842906454	n.s
FOXD3	NaN	n.s	5.32360042475508e-34	lusc	38,24175824	0	38,24175824	0,888009997	n.s	77,8012685	0	77,8012685	0,639758943	n.s
CACNG5	NaN	n.s	0.180431572058838	n.s	5,054945055	0	5,054945055	0,063729344	n.s	7,399577167	0	7,399577167	0,274680866	n.s
MORC1	NaN	n.s	1.39068850955691e-08	lusc	2,417582418	0	2,417582418	0,000478719	n.s	12,47357294	0	12,47357294	0,610781478	n.s
SALL3	NaN	n.s	3.00994410186916e-05	n.s	23,95604396	0	23,95604396	0,864526262	n.s	36,78646934	0	36,78646934	0,892235019	n.s
IL36B	NaN	n.s	1.55024205573373e-27	lusc	1,538461538	0	1,538461538	1,97E-06	n.s	26,84989429	0	26,84989429	0,850345605	n.s
IL36A	NaN	n.s	3.96845247400642e-38	lusc	3,076923077	0	3,076923077	0,003614893	n.s	37,63213531	0	37,63213531	0,894627847	n.s
TINAG	NaN	n.s	9.11750336205765e-13	luad	30,98901099	0	30,98901099	0,90039761	n.s	11,62790698	0	11,62790698	0,572683649	n.s
SLCO1B3	NaN	n.s	2.69921606233932e-06	n.s	29,89010989	0	29,89010989	0,896272537	n.s	45,03171247	0	45,03171247	0,899382628	n.s
C6orf15	NaN	n.s	4.12196607846298e-33	lusc	8,351648352	0	8,351648352	0,367407569	n.s	43,12896406	0	43,12896406	0,903762431	n.s
DNMT3L	NaN	n.s	0.0657946454172082	n.s	2,857142857	0	2,857142857	0,002066819	n.s	5,496828753	0	5,496828753	0,107949818	n.s
OBP2B	NaN	n.s	0.580531538403545	n.s	7,252747253	0	7,252747253	0,258666905	n.s	6,131078224	0	6,131078224	0,160067562	n.s
NXPH1	NaN	n.s	0.0175639487408089	n.s	36,04395604	0	36,04395604	0,896348446	n.s	28,54122622	0	28,54122622	0,859975681	n.s
TLX3	NaN	n.s	3.23634740011027e-59	lusc	5,714285714	0	5,714285714	0,111852795	n.s	55,17970402	0	55,17970402	0,868359264	n.s
RAX	NaN	n.s	2.52231329225646e-08	lusc	7,252747253	0	7,252747253	0,258666905	n.s	20,0845666	0	20,0845666	0,790334282	n.s
CTAG2	NaN	n.s	4.83969899667069e-10	lusc	10,32967033	0	10,32967033	0,529123074	n.s	26,42706131	0	26,42706131	0,847699634	n.s
CRNN	NaN	n.s	3.18015204837107e-21	lusc	0,659340659	0	0,659340659	1,56E-14	n.s	19,87315011	0	19,87315011	0,787598969	n.s
IL22	NaN	n.s	0.999999999999998	n.s	0,659340659	0	0,659340659	1,56E-14	n.s	0,845665962	0	0,845665962	1,42E-10	n.s
RDH8	NaN	n.s	0.0664530928472875	n.s	4,175824176	0	4,175824176	0,025035949	n.s	7,188160677	0	7,188160677	0,25546501	n.s
KCNK4	NaN	n.s	0.000126102283841398	n.s	0,43956044	0	0,43956044	1,56E-14	n.s	4,651162791	0	4,651162791	0,052230559	n.s
IRX4	NaN	n.s	1.77742999664735e-86	lusc	9,450549451	0	9,450549451	0,463779977	n.s	73,57293869	0	73,57293869	0,722367743	n.s
TBX22	NaN	n.s	0.999999999999998	n.s	2,197802198	0	2,197802198	0,00018585	n.s	2,325581395	0	2,325581395	0,000721163	n.s
LUZP4	NaN	n.s	0.000135544451161051	n.s	2,637362637	0	2,637362637	0,001049743	n.s	8,66807611	0	8,66807611	0,383784797	n.s
ELOA2	NaN	n.s	5.89249383373975e-10	lusc	10,54945055	0	10,54945055	0,543830581	n.s	26,6384778	0	26,6384778	0,849035587	n.s
TFDP3	NaN	n.s	0.300714046221988	n.s	5,934065934	0	5,934065934	0,130578333	n.s	4,22832981	0	4,22832981	0,033934328	n.s
RXFP3	NaN	n.s	0.176474525883881	n.s	1,758241758	0	1,758241758	1,33E-05	n.s	3,382663848	0	3,382663848	0,01036677	n.s
KRT76	NaN	n.s	2.08116734092032e-27	lusc	1,098901099	0	1,098901099	4,22E-09	n.s	25,79281184	0	25,79281184	0,843528333	n.s
ACTL6B	NaN	n.s	0.204294607014819	n.s	4,615384615	0	4,615384615	0,042148145	n.s	6,765327696	0	6,765327696	0,216832269	n.s
MAGEC2	NaN	n.s	0.00698902132793586	n.s	23,95604396	0	23,95604396	0,864526262	n.s	32,13530655	0	32,13530655	0,876442176	n.s
CABP2	NaN	n.s	0.656342058742734	n.s	1,318681319	0	1,318681319	1,51E-07	n.s	1,902748414	0	1,902748414	0,000107006	n.s
VCX3A	NaN	n.s	1.037840365527e-19	lusc	12,52747253	0	12,52747253	0,650662248	n.s	38,90063425	0	38,90063425	0,897997523	n.s
ASIC5	NaN	n.s	2.98722278031024e-09	lusc	16,48351648	0	16,48351648	0,771732648	n.s	33,61522199	0	33,61522199	0,882020111	n.s
FTHL17	NaN	n.s	1.11873414755349e-05	n.s	6,813186813	0	6,813186813	0,214226	n.s	16,27906977	0	16,27906977	0,726603479	n.s
SNTG1	NaN	n.s	0.475959256226051	n.s	2,197802198	0	2,197802198	0,00018585	n.s	3,171247357	0	3,171247357	0,007090406	n.s
UNC93A	NaN	n.s	0.339408530244959	n.s	40,65934066	0	40,65934066	0,877606049	n.s	43,97463002	0	43,97463002	0,901857868	n.s
HAO1	NaN	n.s	0.0205085006833364	n.s	6,373626374	0	6,373626374	0,171035397	n.s	2,959830867	0	2,959830867	0,004544091	n.s
UGT2B28	NaN	n.s	6.52586735337578e-09	lusc	12,52747253	0	12,52747253	0,650662248	n.s	28,11839323	0	28,11839323	0,857700778	n.s
DDX4	NaN	n.s	6.3224884341615e-07	n.s	21,53846154	0	21,53846154	0,844222873	n.s	9,513742072	0	9,513742072	0,447596662	n.s
CRCT1	NaN	n.s	1.30772137577741e-60	lusc	6,593406593	0	6,593406593	0,19238467	n.s	57,29386892	0	57,29386892	0,8595557	n.s
UGT1A10	NaN	n.s	9.21382710346606e-21	lusc	13,40659341	0	13,40659341	0,686015395	n.s	41,01479915	0	41,01479915	0,90309881	n.s
UGT1A8	NaN	n.s	1.78131688548134e-29	lusc	9,230769231	0	9,230769231	0,445780319	n.s	41,86046512	0	41,86046512	0,904980389	n.s
UGT1A7	NaN	n.s	1.81680516138865e-76	lusc	8,131868132	0	8,131868132	0,346388763	n.s	67,44186047	0	67,44186047	0,795358693	n.s
UGT1A5	NaN	n.s	3.32791080013242e-21	lusc	2,417582418	0	2,417582418	0,000478719	n.s	23,67864693	0	23,67864693	0,827577715	n.s
UGT1A9	NaN	n.s	3.94847045635291e-17	lusc	2,857142857	0	2,857142857	0,002066819	n.s	21,14164905	0	21,14164905	0,802971578	n.s
UGT1A4	NaN	n.s	7.85838932586181e-38	lusc	5,934065934	0	5,934065934	0,130578333	n.s	42,49471459	0	42,49471459	0,905149186	n.s
UGT1A1	NaN	n.s	4.44496281500814e-42	lusc	19,56043956	0	19,56043956	0,822116456	n.s	63,84778013	0	63,84778013	0,823529773	n.s
UGT1A3	NaN	n.s	7.89574774243081e-45	lusc	13,40659341	0	13,40659341	0,686015395	n.s	57,92811839	0	57,92811839	0,856694302	n.s
ROPN1	NaN	n.s	1.7731528923841e-14	lusc	2,637362637	0	2,637362637	0,001049743	n.s	18,39323467	0	18,39323467	0,766159003	n.s
MS4A12	NaN	n.s	0.202800869350275	n.s	0,879120879	0	0,879120879	1,83E-11	n.s	2,114164905	0	2,114164905	0,000303668	n.s
CT55	NaN	n.s	0.00069219686345343	n.s	6,593406593	0	6,593406593	0,19238467	n.s	13,53065539	0	13,53065539	0,650889188	n.s
LINC00483	NaN	n.s	2.33409439462095e-06	n.s	17,58241758	0	17,58241758	0,792617318	n.s	7,188160677	0	7,188160677	0,25546501	n.s
FEZF2	NaN	n.s	0.000473938725057792	n.s	3,736263736	0	3,736263736	0,013285131	n.s	9,725158562	0	9,725158562	0,46227847	n.s
VRTN	NaN	n.s	0.000382539010265592	n.s	0,659340659	0	0,659340659	1,56E-14	n.s	4,651162791	0	4,651162791	0,052230559	n.s
SAGE1	NaN	n.s	1.95004324346976e-16	lusc	8,571428571	0	8,571428571	0,387901866	n.s	30,23255814	0	30,23255814	0,868310212	n.s
KLK15	NaN	n.s	0.000190696819937806	n.s	5,714285714	0	5,714285714	0,111852795	n.s	13,10782241	0	13,10782241	0,635750288	n.s
ALLC	NaN	n.s	2.60655133577896e-09	lusc	5,054945055	0	5,054945055	0,063729344	n.s	17,7589852	0	17,7589852	0,755548798	n.s
TEX13B	NaN	n.s	1.88579198502076e-09	lusc	2,417582418	0	2,417582418	0,000478719	n.s	13,3192389	0	13,3192389	0,643461693	n.s
GKN1	NaN	n.s	0.00729270570231664	n.s	2,417582418	0	2,417582418	0,000478719	n.s	0,21141649	0	0,21141649	2,24E-14	n.s
MMP26	NaN	n.s	0.273456380875373	n.s	3,516483516	0	3,516483516	0,009048815	n.s	2,114164905	0	2,114164905	0,000303668	n.s
ASCL3	NaN	n.s	0.748070283181563	n.s	2,197802198	0	2,197802198	0,00018585	n.s	1,691331924	0	1,691331924	2,85E-05	n.s
IFNK	NaN	n.s	0.497080368679462	n.s	2,417582418	0	2,417582418	0,000478719	n.s	3,382663848	0	3,382663848	0,01036677	n.s
LGALS14	NaN	n.s	0.00552369476978331	n.s	1,318681319	0	1,318681319	1,51E-07	n.s	4,651162791	0	4,651162791	0,052230559	n.s
OTOR	NaN	n.s	2.73954856623597e-07	luad	9,67032967	0	9,67032967	0,481112045	n.s	1,691331924	0	1,691331924	2,85E-05	n.s
C2orf83	NaN	n.s	0.999999999999998	n.s	3,296703297	0	3,296703297	0,005883465	n.s	3,382663848	0	3,382663848	0,01036677	n.s
PRDM9	NaN	n.s	1.77979575983386e-07	lusc	10,98901099	0	10,98901099	0,571396158	n.s	24,31289641	0	24,31289641	0,832728833	n.s
DAZ2	NaN	n.s	0.0304371113027098	n.s	0,21978022	0	0,21978022	1,56E-14	n.s	1,902748414	0	1,902748414	0,000107006	n.s
SLC17A6	NaN	n.s	0.0603891690145342	n.s	0,879120879	0	0,879120879	1,83E-11	n.s	2,748414376	0	2,748414376	0,002687623	n.s
TRIM49	NaN	n.s	0.000981175061393535	n.s	5,054945055	0	5,054945055	0,063729344	n.s	11,205074	0	11,205074	0,551307429	n.s
TRPC7	NaN	n.s	0.000453359835885132	n.s	5,934065934	0	5,934065934	0,130578333	n.s	12,89640592	0	12,89640592	0,627742091	n.s
SLURP1	NaN	n.s	1.25945967395396e-31	lusc	6,373626374	0	6,373626374	0,171035397	n.s	38,90063425	0	38,90063425	0,897997523	n.s
GJD2	NaN	n.s	0.943840613440527	n.s	1,538461538	0	1,538461538	1,97E-06	n.s	1,268498943	0	1,268498943	4,87E-07	n.s
LRTM1	NaN	n.s	3.85042034716893e-08	lusc	1,758241758	0	1,758241758	1,33E-05	n.s	10,78224101	0	10,78224101	0,528218081	n.s
NWD2	NaN	n.s	2.02715688597968e-21	lusc	10,32967033	0	10,32967033	0,529123074	n.s	37,20930233	0	37,20930233	0,893446863	n.s
KLHL1	NaN	n.s	0.0421823282662648	n.s	2,637362637	0	2,637362637	0,001049743	n.s	5,496828753	0	5,496828753	0,107949818	n.s
HMHB1	NaN	n.s	0.731979367661399	n.s	1,758241758	0	1,758241758	1,33E-05	n.s	1,268498943	0	1,268498943	4,87E-07	n.s
ZP4	NaN	n.s	4.67867854824064e-22	lusc	1,978021978	0	1,978021978	5,78E-05	n.s	23,46723044	0	23,46723044	0,825782464	n.s
NGB	NaN	n.s	2.18598205950611e-33	lusc	13,18681319	0	13,18681319	0,677751136	n.s	50,31712474	0	50,31712474	0,885134274	n.s
NEUROD4	NaN	n.s	0.918514052759886	n.s	3,076923077	0	3,076923077	0,003614893	n.s	2,748414376	0	2,748414376	0,002687623	n.s
MYL7	NaN	n.s	3.34653986086648e-12	lusc	3,516483516	0	3,516483516	0,009048815	n.s	17,97040169	0	17,97040169	0,75919219	n.s
OPRPN	NaN	n.s	0.0283939840239507	n.s	0,659340659	0	0,659340659	1,56E-14	n.s	2,748414376	0	2,748414376	0,002687623	n.s
PRODH2	NaN	n.s	0.263912082079323	n.s	2,197802198	0	2,197802198	0,00018585	n.s	1,057082452	0	1,057082452	1,96E-08	n.s
LY6G6D	NaN	n.s	3.70324864042017e-07	lusc	0,879120879	0	0,879120879	1,83E-11	n.s	8,033826638	0	8,033826638	0,33090875	n.s
IL21	NaN	n.s	0.00785429396320217	n.s	7,252747253	0	7,252747253	0,258666905	n.s	3,171247357	0	3,171247357	0,007090406	n.s
CARD18	NaN	n.s	1.10598756812201e-71	lusc	9,67032967	0	9,67032967	0,481112045	n.s	67,23044397	0	67,23044397	0,797244952	n.s
CACNG7	NaN	n.s	0.269716183621728	n.s	6,153846154	0	6,153846154	0,150368874	n.s	8,245243129	0	8,245243129	0,348966088	n.s
PRDM13	NaN	n.s	5.10582398385574e-60	lusc	24,61538462	0	24,61538462	0,869115799	n.s	78,43551797	0	78,43551797	0,623866377	n.s
NYX	NaN	n.s	0.767095359703882	n.s	3,296703297	0	3,296703297	0,005883465	n.s	2,748414376	0	2,748414376	0,002687623	n.s
DMRTC2	NaN	n.s	2.7671218777275e-15	luad	23,2967033	0	23,2967033	0,859570659	n.s	5,073995772	0	5,073995772	0,077701469	n.s
DMRTB1	NaN	n.s	1	n.s	4,395604396	0	4,395604396	0,032893993	n.s	4,4397463	0	4,4397463	0,041843083	n.s
NEUROG2	NaN	n.s	8.32750031988947e-18	lusc	7,912087912	0	7,912087912	0,324912763	n.s	30,44397463	0	30,44397463	0,869273896	n.s
MMP27	NaN	n.s	9.86886485287679e-09	lusc	0,879120879	0	0,879120879	1,83E-11	n.s	9,513742072	0	9,513742072	0,447596662	n.s
GFRA4	NaN	n.s	0.999999999999998	n.s	3,736263736	0	3,736263736	0,013285131	n.s	3,805496829	0	3,805496829	0,020214634	n.s
EDDM3B	NaN	n.s	0.000147669586979698	n.s	3,956043956	0	3,956043956	0,018624452	n.s	0,21141649	0	0,21141649	2,24E-14	n.s
LHX5	NaN	n.s	7.15455248455013e-43	lusc	36,7032967	0	36,7032967	0,893948597	n.s	81,18393235	0	81,18393235	0,540825132	n.s
ABCG8	NaN	n.s	9.14857309454054e-21	lusc	6,593406593	0	6,593406593	0,19238467	n.s	30,86680761	0	30,86680761	0,871153916	n.s
GMCL2	NaN	n.s	0.0195372059900183	n.s	1,318681319	0	1,318681319	1,51E-07	n.s	4,016913319	0	4,016913319	0,026653234	n.s
NDST4	NaN	n.s	0.0481858119581194	n.s	5,494505495	0	5,494505495	0,094369418	n.s	9,090909091	0	9,090909091	0,416699121	n.s
TSPY2	NaN	n.s	0.0302281921654001	n.s	2,637362637	0	2,637362637	0,001049743	n.s	5,708245243	0	5,708245243	0,124564593	n.s
PLA2G2F	NaN	n.s	0.19602780725012	n.s	44,17582418	0	44,17582418	0,859652876	n.s	48,62579281	0	48,62579281	0,890072601	n.s
SPANXD	NaN	n.s	0.0887352252261948	n.s	6,813186813	0	6,813186813	0,214226	n.s	10,14799154	0	10,14799154	0,490122766	n.s
SPANXC	NaN	n.s	0.000896422280912978	n.s	5,934065934	0	5,934065934	0,130578333	n.s	12,47357294	0	12,47357294	0,610781478	n.s
IL25	NaN	n.s	4.4686816161941e-10	lusc	0,43956044	0	0,43956044	1,56E-14	n.s	9,725158562	0	9,725158562	0,46227847	n.s
ETNPPL	NaN	n.s	2.53240336213333e-19	luad	21,97802198	0	21,97802198	0,848385243	n.s	2,536997886	0	2,536997886	0,00146747	n.s
AGXT2	NaN	n.s	0.000759506677597785	n.s	5,054945055	0	5,054945055	0,063729344	n.s	1,057082452	0	1,057082452	1,96E-08	n.s
SLX1B	NaN	n.s	0.00210977173698747	n.s	5,714285714	0	5,714285714	0,111852795	n.s	11,62790698	0	11,62790698	0,572683649	n.s
TRIM48	NaN	n.s	0.938676378843487	n.s	7,472527473	0	7,472527473	0,280941555	n.s	7,822410148	0	7,822410148	0,312472118	n.s
OR51J1	NaN	n.s	0.823557687032807	n.s	1,098901099	0	1,098901099	4,22E-09	n.s	1,479915433	0	1,479915433	5,05E-06	n.s
LMAN1L	NaN	n.s	0.000126102283841398	n.s	0,43956044	0	0,43956044	1,56E-14	n.s	4,651162791	0	4,651162791	0,052230559	n.s
UGT2A3	NaN	n.s	0.420025869306203	n.s	4,395604396	0	4,395604396	0,032893993	n.s	3,171247357	0	3,171247357	0,007090406	n.s
ADAMTS20	NaN	n.s	8.45067172266769e-69	lusc	23,73626374	0	23,73626374	0,862917043	n.s	81,39534884	0	81,39534884	0,533359771	n.s
C7orf69	NaN	n.s	0.797701254996192	n.s	0,879120879	0	0,879120879	1,83E-11	n.s	1,268498943	0	1,268498943	4,87E-07	n.s
ESX1	NaN	n.s	0.0185456656750155	n.s	3,956043956	0	3,956043956	0,018624452	n.s	7,822410148	0	7,822410148	0,312472118	n.s
APOL5	NaN	n.s	0.651953218961598	n.s	4,615384615	0	4,615384615	0,042148145	n.s	3,805496829	0	3,805496829	0,020214634	n.s
OR6N2	NaN	n.s	NaN	n.s	0	0	0	NA	n.s	0	0	0	NA	n.s
OR2C3	NaN	n.s	0.497509143152232	n.s	1,318681319	0	1,318681319	1,51E-07	n.s	2,114164905	0	2,114164905	0,000303668	n.s
RSPH6A	NaN	n.s	0.593327603231431	n.s	9,010989011	0	9,010989011	0,427121179	n.s	7,822410148	0	7,822410148	0,312472118	n.s
CFHR5	NaN	n.s	0.00028490008082163	n.s	10,98901099	0	10,98901099	0,571396158	n.s	4,4397463	0	4,4397463	0,041843083	n.s
ACTL8	NaN	n.s	5.8490085267746e-30	lusc	25,27472527	0	25,27472527	0,873376268	n.s	62,57928118	0	62,57928118	0,831797089	n.s
DEFB126	NaN	n.s	2.52036331735059e-49	lusc	13,18681319	0	13,18681319	0,677751136	n.s	60,25369979	0	60,25369979	0,84518854	n.s
SHCBP1L	NaN	n.s	0.729965898308613	n.s	4,175824176	0	4,175824176	0,025035949	n.s	4,862579281	0	4,862579281	0,064318205	n.s
SPACA1	NaN	n.s	0.931909428164102	n.s	2,197802198	0	2,197802198	0,00018585	n.s	1,902748414	0	1,902748414	0,000107006	n.s
KRTAP1-3	NaN	n.s	0.165053890725927	n.s	1,098901099	0	1,098901099	4,22E-09	n.s	2,536997886	0	2,536997886	0,00146747	n.s
KRTAP1-1	NaN	n.s	0.773169756683765	n.s	6,593406593	0	6,593406593	0,19238467	n.s	5,919661734	0	5,919661734	0,141986149	n.s
GPR101	NaN	n.s	0.0304371113027098	n.s	0,21978022	0	0,21978022	1,56E-14	n.s	1,902748414	0	1,902748414	0,000107006	n.s
RTP3	NaN	n.s	1.69797665793928e-33	lusc	0,659340659	0	0,659340659	1,56E-14	n.s	29,38689218	0	29,38689218	0,864287938	n.s
TFAP2D	NaN	n.s	3.04382324905668e-16	luad	43,07692308	0	43,07692308	0,865668009	n.s	18,18181818	0	18,18181818	0,762727475	n.s
USP26	NaN	n.s	0.304859553025473	n.s	2,417582418	0	2,417582418	0,000478719	n.s	3,805496829	0	3,805496829	0,020214634	n.s
SPATA16	NaN	n.s	0.00284801615224866	n.s	4,615384615	0	4,615384615	0,042148145	n.s	9,936575053	0	9,936575053	0,476451783	n.s
KRTAP1-5	NaN	n.s	0.00360579901164982	n.s	3,516483516	0	3,516483516	0,009048815	n.s	8,245243129	0	8,245243129	0,348966088	n.s
KRTAP3-1	NaN	n.s	0.000123483710837128	n.s	17,14285714	0	17,14285714	0,784718028	n.s	27,90697674	0	27,90697674	0,856531705	n.s
KRTAP3-2	NaN	n.s	0.00616084584378734	n.s	2,857142857	0	2,857142857	0,002066819	n.s	6,976744186	0	6,976744186	0,236148644	n.s
KRTAP17-1	NaN	n.s	3.33621380733347e-14	lusc	1,318681319	0	1,318681319	1,51E-07	n.s	15,43340381	0	15,43340381	0,706847508	n.s
TKTL2	NaN	n.s	0.00977465477446744	n.s	3,956043956	0	3,956043956	0,018624452	n.s	8,245243129	0	8,245243129	0,348966088	n.s
C4orf17	NaN	n.s	1.09813525072098e-33	lusc	1,978021978	0	1,978021978	5,78E-05	n.s	32,34672304	0	32,34672304	0,877275882	n.s
ZIC4	NaN	n.s	5.72973770656797e-17	lusc	17,58241758	0	17,58241758	0,792617318	n.s	43,12896406	0	43,12896406	0,903762431	n.s
PRAC1	NaN	n.s	0.000111218702244996	n.s	2,197802198	0	2,197802198	0,00018585	n.s	8,033826638	0	8,033826638	0,33090875	n.s
RHOXF2	NaN	n.s	0.999999999999999	n.s	1,538461538	0	1,538461538	1,97E-06	n.s	1,691331924	0	1,691331924	2,85E-05	n.s
MCHR2	NaN	n.s	1.51982813956111e-09	lusc	9,67032967	0	9,67032967	0,481112045	n.s	24,94714588	0	24,94714588	0,837553325	n.s
MT4	NaN	n.s	0.0108377313339474	n.s	0,21978022	0	0,21978022	1,56E-14	n.s	2,325581395	0	2,325581395	0,000721163	n.s
IL1F10	NaN	n.s	3.50626090180211e-25	lusc	4,175824176	0	4,175824176	0,025035949	n.s	30,23255814	0	30,23255814	0,868310212	n.s
LCE3D	NaN	n.s	1.48849582444597e-73	lusc	3,076923077	0	3,076923077	0,003614893	n.s	58,56236786	0	58,56236786	0,853720546	n.s
SPZ1	NaN	n.s	3.16151078332522e-07	lusc	5,274725275	0	5,274725275	0,078285304	n.s	15,85623679	0	15,85623679	0,717057257	n.s
RETNLB	NaN	n.s	6.73512026216396e-35	lusc	26,81318681	0	26,81318681	0,882212273	n.s	67,44186047	0	67,44186047	0,795358693	n.s
FAM71F1	NaN	n.s	1.43348936005289e-38	lusc	8,131868132	0	8,131868132	0,346388763	n.s	46,51162791	0	46,51162791	0,895726552	n.s
GJA10	NaN	n.s	0.0114122521596777	n.s	5,494505495	0	5,494505495	0,094369418	n.s	2,114164905	0	2,114164905	0,000303668	n.s
NAA11	NaN	n.s	0.0189949320493694	n.s	11,86813187	0	11,86813187	0,619704692	n.s	17,54756871	0	17,54756871	0,751792727	n.s
RAX2	NaN	n.s	0.587808229353372	n.s	0,879120879	0	0,879120879	1,83E-11	n.s	1,479915433	0	1,479915433	5,05E-06	n.s
ADGRG7	NaN	n.s	0.0605821117311522	n.s	3,296703297	0	3,296703297	0,005883465	n.s	6,131078224	0	6,131078224	0,160067562	n.s
C1orf94	NaN	n.s	0.0970290798789809	n.s	2,417582418	0	2,417582418	0,000478719	n.s	4,651162791	0	4,651162791	0,052230559	n.s
HIST1H2AH	NaN	n.s	1.08220066999817e-05	n.s	9,89010989	0	9,89010989	0,497775685	n.s	20,50739958	0	20,50739958	0,795589319	n.s
KRTAP4-1	NaN	n.s	2.51673000556343e-17	lusc	58,9010989	0	58,9010989	0,718299566	n.s	84,14376321	0	84,14376321	0,420321153	n.s
BAGE2	NaN	n.s	3.13955035843482e-05	n.s	14,06593407	0	14,06593407	0,708768642	n.s	25,15856237	0	25,15856237	0,839094097	n.s
ZIC5	NaN	n.s	3.89929039610587e-77	lusc	25,27472527	0	25,27472527	0,873376268	n.s	86,04651163	0	86,04651163	0,325038912	n.s
CABS1	NaN	n.s	1.63050273824406e-05	n.s	0,43956044	0	0,43956044	1,56E-14	n.s	5,496828753	0	5,496828753	0,107949818	n.s
CNTNAP4	NaN	n.s	5.30551024932259e-08	lusc	16,04395604	0	16,04395604	0,762226836	n.s	31,50105708	0	31,50105708	0,873861331	n.s
SCRT2	NaN	n.s	0.00884707423947519	n.s	2,857142857	0	2,857142857	0,002066819	n.s	6,765327696	0	6,765327696	0,216832269	n.s
GALP	NaN	n.s	0.275202818198881	n.s	5,054945055	0	5,054945055	0,063729344	n.s	6,976744186	0	6,976744186	0,236148644	n.s
SERPINB12	NaN	n.s	1.57244863940372e-87	lusc	3,076923077	0	3,076923077	0,003614893	n.s	65,32769556	0	65,32769556	0,812864322	n.s
PLCZ1	NaN	n.s	0.92093023736045	n.s	15,82417582	0	15,82417582	0,757193007	n.s	16,27906977	0	16,27906977	0,726603479	n.s
TPD52L3	NaN	n.s	0.973151003070689	n.s	0,43956044	0	0,43956044	1,56E-14	n.s	0,21141649	0	0,21141649	2,24E-14	n.s
FRMD7	NaN	n.s	7.73313250768322e-11	lusc	3,296703297	0	3,296703297	0,005883465	n.s	16,27906977	0	16,27906977	0,726603479	n.s
WFDC8	NaN	n.s	0.00413627158272933	n.s	3,516483516	0	3,516483516	0,009048815	n.s	0,634249471	0	0,634249471	3,43E-14	n.s
TGIF2LX	NaN	n.s	1.12588793212957e-07	lusc	7,912087912	0	7,912087912	0,324912763	n.s	20,29598309	0	20,29598309	0,792996833	n.s
TGIF2LY	NaN	n.s	0.00032702833746421	n.s	1,758241758	0	1,758241758	1,33E-05	n.s	6,765327696	0	6,765327696	0,216832269	n.s
ZNF479	NaN	n.s	0.731979367661399	n.s	1,758241758	0	1,758241758	1,33E-05	n.s	1,268498943	0	1,268498943	4,87E-07	n.s
ANKRD30A	NaN	n.s	0.0634399098984444	n.s	3,296703297	0	3,296703297	0,005883465	n.s	1,268498943	0	1,268498943	4,87E-07	n.s
ISX	NaN	n.s	5.25232255116188e-07	luad	16,48351648	0	16,48351648	0,771732648	n.s	5,919661734	0	5,919661734	0,141986149	n.s
C1orf105	NaN	n.s	2.20691841677382e-11	luad	23,73626374	0	23,73626374	0,862917043	n.s	7,610993658	0	7,610993658	0,293708359	n.s
MYL10	NaN	n.s	0.110649132151	n.s	1,538461538	0	1,538461538	1,97E-06	n.s	3,382663848	0	3,382663848	0,01036677	n.s
CGB5	NaN	n.s	0.100189783807103	n.s	16,48351648	0	16,48351648	0,771732648	n.s	12,47357294	0	12,47357294	0,610781478	n.s
CAPZA3	NaN	n.s	0.033668578788263	n.s	9,89010989	0	9,89010989	0,497775685	n.s	5,919661734	0	5,919661734	0,141986149	n.s
CGB8	NaN	n.s	0.00445103975871464	n.s	10,10989011	0	10,10989011	0,513776038	n.s	16,70190275	0	16,70190275	0,735541931	n.s
IL17F	NaN	n.s	0.681612164319559	n.s	1,098901099	0	1,098901099	4,22E-09	n.s	0,634249471	0	0,634249471	3,43E-14	n.s
PTH2	NaN	n.s	0.099150824045175	n.s	5,054945055	0	5,054945055	0,063729344	n.s	2,748414376	0	2,748414376	0,002687623	n.s
CGB2	NaN	n.s	6.14901309079109e-17	lusc	3,956043956	0	3,956043956	0,018624452	n.s	23,04439746	0	23,04439746	0,822066711	n.s
PGLYRP3	NaN	n.s	1.1377965068875e-50	lusc	35,6043956	0	35,6043956	0,897902835	n.s	83,93234672	0	83,93234672	0,430093176	n.s
SLITRK1	NaN	n.s	0.00178868270264323	n.s	11,42857143	0	11,42857143	0,596629446	n.s	19,02748414	0	19,02748414	0,775871502	n.s
KIR3DL3	NaN	n.s	0.081745031757843	n.s	6,813186813	0	6,813186813	0,214226	n.s	4,016913319	0	4,016913319	0,026653234	n.s
FANCD2OS	NaN	n.s	0.589479074176043	n.s	8,351648352	0	8,351648352	0,367407569	n.s	7,188160677	0	7,188160677	0,25546501	n.s
SLC22A12	NaN	n.s	0.999999999999999	n.s	0,43956044	0	0,43956044	1,56E-14	n.s	0,422832981	0	0,422832981	2,24E-14	n.s
DIRC1	NaN	n.s	4.89300474791342e-16	lusc	11,86813187	0	11,86813187	0,619704692	n.s	34,67230444	0	34,67230444	0,885665301	n.s
TGM7	NaN	n.s	0.00895712965678502	n.s	5,494505495	0	5,494505495	0,094369418	n.s	10,35940803	0	10,35940803	0,503300102	n.s
PANX3	NaN	n.s	0.0665175884438557	n.s	5,714285714	0	5,714285714	0,111852795	n.s	9,090909091	0	9,090909091	0,416699121	n.s
MRGPRD	NaN	n.s	0.399823992126516	n.s	1,538461538	0	1,538461538	1,97E-06	n.s	2,536997886	0	2,536997886	0,00146747	n.s
MRGPRX3	NaN	n.s	4.55350601132405e-54	lusc	4,395604396	0	4,395604396	0,032893993	n.s	50,10570825	0	50,10570825	0,885773608	n.s
MRGPRX4	NaN	n.s	0.00429414449913225	n.s	1,758241758	0	1,758241758	1,33E-05	n.s	5,496828753	0	5,496828753	0,107949818	n.s
CIB3	NaN	n.s	0.462394150603265	n.s	1,098901099	0	1,098901099	4,22E-09	n.s	1,902748414	0	1,902748414	0,000107006	n.s
OLFM3	NaN	n.s	0.000981175061393535	n.s	5,054945055	0	5,054945055	0,063729344	n.s	11,205074	0	11,205074	0,551307429	n.s
LYZL2	NaN	n.s	0.00405622182008872	n.s	6,373626374	0	6,373626374	0,171035397	n.s	2,325581395	0	2,325581395	0,000721163	n.s
PNLIPRP3	NaN	n.s	0.000318644700847055	n.s	12,96703297	0	12,96703297	0,669117069	n.s	22,1987315	0	22,1987315	0,814093086	n.s
OR52E2	NaN	n.s	0.764713004071307	n.s	3,076923077	0	3,076923077	0,003614893	n.s	2,536997886	0	2,536997886	0,00146747	n.s
DBX1	NaN	n.s	4.11980185211069e-13	lusc	3,516483516	0	3,516483516	0,009048815	n.s	18,81606765	0	18,81606765	0,772727163	n.s
OR2D3	NaN	n.s	0.0198940704928274	n.s	1,538461538	0	1,538461538	1,97E-06	n.s	0	0	0	NA	n.s
OR2D2	NaN	n.s	0.0651984650685392	n.s	2,637362637	0	2,637362637	0,001049743	n.s	0,845665962	0	0,845665962	1,42E-10	n.s
KRT74	NaN	n.s	3.81668102166878e-155	lusc	1,538461538	0	1,538461538	1,97E-06	n.s	88,58350951	0	88,58350951	0,187036838	n.s
ASCL4	NaN	n.s	1.34674815082959e-23	lusc	2,197802198	0	2,197802198	0,00018585	n.s	25,15856237	0	25,15856237	0,839094097	n.s
SPIC	NaN	n.s	1.38283657956145e-05	n.s	1,318681319	0	1,318681319	1,51E-07	n.s	7,399577167	0	7,399577167	0,274680866	n.s
SPACA7	NaN	n.s	0.250655867816392	n.s	0,659340659	0	0,659340659	1,56E-14	n.s	1,691331924	0	1,691331924	2,85E-05	n.s
OR11H6	NaN	n.s	3.70324864042017e-07	lusc	0,879120879	0	0,879120879	1,83E-11	n.s	8,033826638	0	8,033826638	0,33090875	n.s
GPHB5	NaN	n.s	1.1055208170972e-10	lusc	0,21978022	0	0,21978022	1,56E-14	n.s	9,725158562	0	9,725158562	0,46227847	n.s
HIGD2B	NaN	n.s	0.191680186221932	n.s	1,318681319	0	1,318681319	1,51E-07	n.s	2,748414376	0	2,748414376	0,002687623	n.s
sept-12	NaN	n.s	8.61432880931998e-06	n.s	26,37362637	0	26,37362637	0,879831954	n.s	40,38054968	0	40,38054968	0,901630593	n.s
ZPBP2	NaN	n.s	0.00261925096931794	n.s	5,934065934	0	5,934065934	0,130578333	n.s	1,902748414	0	1,902748414	0,000107006	n.s
CALR3	NaN	n.s	0.0020962943001196	n.s	8,131868132	0	8,131868132	0,346388763	n.s	14,79915433	0	14,79915433	0,690152456	n.s
NLRP13	NaN	n.s	0.0720350344738657	n.s	6,373626374	0	6,373626374	0,171035397	n.s	3,594080338	0	3,594080338	0,014796286	n.s
NLRP8	NaN	n.s	5.96614949090779e-11	luad	11,20879121	0	11,20879121	0,584293685	n.s	0,845665962	0	0,845665962	1,42E-10	n.s
NLRP5	NaN	n.s	0.00125465092242682	n.s	9,230769231	0	9,230769231	0,445780319	n.s	3,805496829	0	3,805496829	0,020214634	n.s
PLK5	NaN	n.s	9.70957927681553e-05	n.s	22,85714286	0	22,85714286	0,856042859	n.s	34,67230444	0	34,67230444	0,885665301	n.s
TCHHL1	NaN	n.s	1.46441680228822e-10	lusc	2,197802198	0	2,197802198	0,00018585	n.s	13,95348837	0	13,95348837	0,664941562	n.s
RPTN	NaN	n.s	1.66534498028566e-61	lusc	4,395604396	0	4,395604396	0,032893993	n.s	54,33403805	0	54,33403805	0,871595704	n.s
AADACL3	NaN	n.s	0.00373001939377018	n.s	1,978021978	0	1,978021978	5,78E-05	n.s	5,919661734	0	5,919661734	0,141986149	n.s
HIST2H3C	NaN	n.s	0.901486946113608	n.s	4,395604396	0	4,395604396	0,032893993	n.s	4,016913319	0	4,016913319	0,026653234	n.s
ATP6V1G3	NaN	n.s	0.75815271760075	n.s	2,637362637	0	2,637362637	0,001049743	n.s	2,114164905	0	2,114164905	0,000303668	n.s
OR10J5	NaN	n.s	0.128331186286466	n.s	1,978021978	0	1,978021978	5,78E-05	n.s	0,634249471	0	0,634249471	3,43E-14	n.s
HMGB4	NaN	n.s	0.000496463150895737	n.s	4,835164835	0	4,835164835	0,052352371	n.s	0,845665962	0	0,845665962	1,42E-10	n.s
OCSTAMP	NaN	n.s	0.773046281933615	n.s	2,637362637	0	2,637362637	0,001049743	n.s	3,171247357	0	3,171247357	0,007090406	n.s
C20orf141	NaN	n.s	0.615515078125533	n.s	10,98901099	0	10,98901099	0,571396158	n.s	12,26215645	0	12,26215645	0,601801056	n.s
PROKR2	NaN	n.s	0.000382539010265592	n.s	0,659340659	0	0,659340659	1,56E-14	n.s	4,651162791	0	4,651162791	0,052230559	n.s
CSTL1	NaN	n.s	1.45533620338032e-09	lusc	32,96703297	0	32,96703297	0,906526294	n.s	52,85412262	0	52,85412262	0,8769141	n.s
CST9	NaN	n.s	1.16930704232491e-15	lusc	1,318681319	0	1,318681319	1,51E-07	n.s	16,70190275	0	16,70190275	0,735541931	n.s
BPIFB6	NaN	n.s	1.58277284902599e-06	n.s	10,10989011	0	10,10989011	0,513776038	n.s	2,325581395	0	2,325581395	0,000721163	n.s
FAM83C	NaN	n.s	2.65642609295949e-109	lusc	2,637362637	0	2,637362637	0,001049743	n.s	73,99577167	0	73,99577167	0,715622451	n.s
ZNF280A	NaN	n.s	8.26216918546074e-42	lusc	25,93406593	0	25,93406593	0,877340059	n.s	70,61310782	0	70,61310782	0,76263005	n.s
CNTNAP5	NaN	n.s	1.04835181444259e-42	lusc	9,89010989	0	9,89010989	0,497775685	n.s	51,79704017	0	51,79704017	0,880467671	n.s
TRIM43	NaN	n.s	1.3299610158177e-05	n.s	5,274725275	0	5,274725275	0,078285304	n.s	13,95348837	0	13,95348837	0,664941562	n.s
OR9A4	NaN	n.s	9.93274418721915e-14	lusc	5,494505495	0	5,494505495	0,094369418	n.s	22,83298097	0	22,83298097	0,820143366	n.s
REG3G	NaN	n.s	0.462054021626022	n.s	0,43956044	0	0,43956044	1,56E-14	n.s	0	0	0	NA	n.s
LYZL4	NaN	n.s	7.10835434711985e-06	n.s	7,472527473	0	7,472527473	0,280941555	n.s	1,268498943	0	1,268498943	4,87E-07	n.s
TMEM207	NaN	n.s	0.952546267647853	n.s	3,516483516	0	3,516483516	0,009048815	n.s	3,805496829	0	3,805496829	0,020214634	n.s
SYNPR	NaN	n.s	0.999999999999998	n.s	16,48351648	0	16,48351648	0,771732648	n.s	16,49048626	0	16,49048626	0,731145403	n.s
H1FOO	NaN	n.s	0.0509782677232628	n.s	0,21978022	0	0,21978022	1,56E-14	n.s	1,691331924	0	1,691331924	2,85E-05	n.s
TMPRSS11B	NaN	n.s	1.58795394417257e-51	lusc	0,659340659	0	0,659340659	1,56E-14	n.s	41,64904863	0	41,64904863	0,904517851	n.s
PDCL2	NaN	n.s	0.00895828599501745	n.s	11,64835165	0	11,64835165	0,608425629	n.s	17,97040169	0	17,97040169	0,75919219	n.s
OTOP1	NaN	n.s	1.42627962393107e-10	lusc	1,978021978	0	1,978021978	5,78E-05	n.s	13,53065539	0	13,53065539	0,650889188	n.s
SLCO6A1	NaN	n.s	9.30158834814604e-24	lusc	27,47252747	0	27,47252747	0,885588632	n.s	60,46511628	0	60,46511628	0,844055409	n.s
GPR151	NaN	n.s	0.0421823282662648	n.s	2,637362637	0	2,637362637	0,001049743	n.s	5,496828753	0	5,496828753	0,107949818	n.s
ACOT12	NaN	n.s	0.00300636827098213	n.s	3,736263736	0	3,736263736	0,013285131	n.s	8,66807611	0	8,66807611	0,383784797	n.s
CLVS2	NaN	n.s	6.84791742904994e-10	lusc	2,417582418	0	2,417582418	0,000478719	n.s	13,74207188	0	13,74207188	0,658045173	n.s
TAAR1	NaN	n.s	0.589447747628051	n.s	5,494505495	0	5,494505495	0,094369418	n.s	6,553911205	0	6,553911205	0,19762874	n.s
NOBOX	NaN	n.s	1.15191393569898e-13	lusc	1,538461538	0	1,538461538	1,97E-06	n.s	15,43340381	0	15,43340381	0,706847508	n.s
ASB10	NaN	n.s	0.151825534373865	n.s	5,274725275	0	5,274725275	0,078285304	n.s	7,822410148	0	7,822410148	0,312472118	n.s
GOT1L1	NaN	n.s	1.90847246886999e-05	n.s	0,659340659	0	0,659340659	1,56E-14	n.s	5,919661734	0	5,919661734	0,141986149	n.s
NKX2-6	NaN	n.s	0.000296588947198628	n.s	1,978021978	0	1,978021978	5,78E-05	n.s	7,188160677	0	7,188160677	0,25546501	n.s
SGCZ	NaN	n.s	1.0237309455066e-28	lusc	3,516483516	0	3,516483516	0,009048815	n.s	31,71247357	0	31,71247357	0,874735223	n.s
DCAF4L2	NaN	n.s	0.00071089428171645	n.s	11,20879121	0	11,20879121	0,584293685	n.s	19,45031712	0	19,45031712	0,78189862	n.s
RALYL	NaN	n.s	2.27787519243e-08	lusc	2,417582418	0	2,417582418	0,000478719	n.s	12,26215645	0	12,26215645	0,601801056	n.s
C9orf57	NaN	n.s	0.201733029055063	n.s	1,098901099	0	1,098901099	4,22E-09	n.s	0,21141649	0	0,21141649	2,24E-14	n.s
LCN8	NaN	n.s	0.0853167170587526	n.s	3,736263736	0	3,736263736	0,013285131	n.s	1,691331924	0	1,691331924	2,85E-05	n.s
OR1N2	NaN	n.s	0.258236476153056	n.s	3,296703297	0	3,296703297	0,005883465	n.s	1,902748414	0	1,902748414	0,000107006	n.s
MAGEC3	NaN	n.s	3.69532247950138e-11	luad	21,53846154	0	21,53846154	0,844222873	n.s	6,342494715	0	6,342494715	0,178662404	n.s
PASD1	NaN	n.s	9.32966963491691e-06	n.s	6,153846154	0	6,153846154	0,150368874	n.s	15,43340381	0	15,43340381	0,706847508	n.s
PPP4R3C	NaN	n.s	3.07057917627423e-05	n.s	9,89010989	0	9,89010989	0,497775685	n.s	19,87315011	0	19,87315011	0,787598969	n.s
MAGEB10	NaN	n.s	0.323919799615306	n.s	2,637362637	0	2,637362637	0,001049743	n.s	4,016913319	0	4,016913319	0,026653234	n.s
DCAF8L1	NaN	n.s	0.0847553669666294	n.s	5,714285714	0	5,714285714	0,111852795	n.s	8,8794926	0	8,8794926	0,400489398	n.s
MAGEB16	NaN	n.s	0.759142307803259	n.s	7,692307692	0	7,692307692	0,303063289	n.s	8,456659619	0	8,456659619	0,36660228	n.s
FOXR2	NaN	n.s	0.759053869819201	n.s	4,835164835	0	4,835164835	0,052352371	n.s	5,496828753	0	5,496828753	0,107949818	n.s
GPR119	NaN	n.s	0.0188564557582771	n.s	2,857142857	0	2,857142857	0,002066819	n.s	0,634249471	0	0,634249471	3,43E-14	n.s
RPS4Y2	NaN	n.s	0.999999999999999	n.s	0,879120879	0	0,879120879	1,83E-11	n.s	1,057082452	0	1,057082452	1,96E-08	n.s
RNF113B	NaN	n.s	0.420025869306203	n.s	4,395604396	0	4,395604396	0,032893993	n.s	3,171247357	0	3,171247357	0,007090406	n.s
MUC17	NaN	n.s	9.68593741741497e-06	n.s	9,67032967	0	9,67032967	0,481112045	n.s	2,536997886	0	2,536997886	0,00146747	n.s
BANF2	NaN	n.s	6.4406869151149e-09	luad	10,32967033	0	10,32967033	0,529123074	n.s	1,268498943	0	1,268498943	4,87E-07	n.s
CST11	NaN	n.s	5.89501984970881e-08	lusc	10,54945055	0	10,54945055	0,543830581	n.s	24,31289641	0	24,31289641	0,832728833	n.s
ASB15	NaN	n.s	0.295090242120978	n.s	0,879120879	0	0,879120879	1,83E-11	n.s	1,902748414	0	1,902748414	0,000107006	n.s
OR10A5	NaN	n.s	0.116554586707348	n.s	1,318681319	0	1,318681319	1,51E-07	n.s	0,21141649	0	0,21141649	2,24E-14	n.s
SERPINA12	NaN	n.s	3.73012150981296e-25	lusc	0,21978022	0	0,21978022	1,56E-14	n.s	21,98731501	0	21,98731501	0,811977411	n.s
SPATA8	NaN	n.s	0.00185939821018865	n.s	1,758241758	0	1,758241758	1,33E-05	n.s	5,919661734	0	5,919661734	0,141986149	n.s
PRR35	NaN	n.s	0.000160124189968464	n.s	4,615384615	0	4,615384615	0,042148145	n.s	11,62790698	0	11,62790698	0,572683649	n.s
C17orf77	NaN	n.s	0.00015047221937486	n.s	0,879120879	0	0,879120879	1,83E-11	n.s	5,496828753	0	5,496828753	0,107949818	n.s
SLC35G3	NaN	n.s	9.00028094028151e-14	lusc	0,21978022	0	0,21978022	1,56E-14	n.s	12,47357294	0	12,47357294	0,610781478	n.s
KRT25	NaN	n.s	3.45030647067806e-05	n.s	0,879120879	0	0,879120879	1,83E-11	n.s	6,131078224	0	6,131078224	0,160067562	n.s
DSG4	NaN	n.s	2.54611672915698e-31	lusc	15,38461538	0	15,38461538	0,746514547	n.s	51,79704017	0	51,79704017	0,880467671	n.s
ERVV-1	NaN	n.s	0.0358987161239649	n.s	27,25274725	0	27,25274725	0,884487981	n.s	21,14164905	0	21,14164905	0,802971578	n.s
LYPD4	NaN	n.s	0.00139904902814105	n.s	7,912087912	0	7,912087912	0,324912763	n.s	2,959830867	0	2,959830867	0,004544091	n.s
NBPF4	NaN	n.s	0.397654958803346	n.s	11,42857143	0	11,42857143	0,596629446	n.s	9,513742072	0	9,513742072	0,447596662	n.s
LELP1	NaN	n.s	4.15795564408258e-06	n.s	0,659340659	0	0,659340659	1,56E-14	n.s	6,553911205	0	6,553911205	0,19762874	n.s
METTL11B	NaN	n.s	4.5040318493941e-51	lusc	35,38461538	0	35,38461538	0,898666786	n.s	83,93234672	0	83,93234672	0,430093176	n.s
ADIG	NaN	n.s	2.67720192052465e-06	n.s	0,21978022	0	0,21978022	1,56E-14	n.s	5,708245243	0	5,708245243	0,124564593	n.s
GTSF1L	NaN	n.s	0.1345588746158	n.s	6,153846154	0	6,153846154	0,150368874	n.s	3,805496829	0	3,805496829	0,020214634	n.s
BPIFB4	NaN	n.s	0.00066212549080211	n.s	31,64835165	0	31,64835165	0,902689818	n.s	21,56448203	0	21,56448203	0,807587006	n.s
C22orf42	NaN	n.s	0.0283939840239507	n.s	0,659340659	0	0,659340659	1,56E-14	n.s	2,748414376	0	2,748414376	0,002687623	n.s
PNPLA5	NaN	n.s	6.18609416048522e-07	n.s	24,61538462	0	24,61538462	0,869115799	n.s	40,16913319	0	40,16913319	0,901129785	n.s
SMYD1	NaN	n.s	0.00613094683787908	n.s	1,098901099	0	1,098901099	4,22E-09	n.s	4,22832981	0	4,22832981	0,033934328	n.s
OTOS	NaN	n.s	0.996970080491817	n.s	11,42857143	0	11,42857143	0,596629446	n.s	11,205074	0	11,205074	0,551307429	n.s
ZSWIM2	NaN	n.s	0.0259120118126071	n.s	1,978021978	0	1,978021978	5,78E-05	n.s	4,862579281	0	4,862579281	0,064318205	n.s
CCDC140	NaN	n.s	3.88402321953465e-08	lusc	1,978021978	0	1,978021978	5,78E-05	n.s	11,205074	0	11,205074	0,551307429	n.s
DPPA2	NaN	n.s	6.68185544403374e-42	lusc	5,714285714	0	5,714285714	0,111852795	n.s	44,82029598	0	44,82029598	0,899886406	n.s
C3orf22	NaN	n.s	0.999999999999999	n.s	2,197802198	0	2,197802198	0,00018585	n.s	2,114164905	0	2,114164905	0,000303668	n.s
C3orf30	NaN	n.s	2.94219686783072e-11	luad	36,92307692	0	36,92307692	0,893129878	n.s	17,33615222	0	17,33615222	0,747919178	n.s
SLC25A48	NaN	n.s	4.59374614985365e-19	lusc	35,82417582	0	35,82417582	0,8971301	n.s	65,32769556	0	65,32769556	0,812864322	n.s
RAET1L	NaN	n.s	8.80179681061315e-110	lusc	15,38461538	0	15,38461538	0,746514547	n.s	88,58350951	0	88,58350951	0,187036838	n.s
HDGFL1	NaN	n.s	2.463222281044e-14	lusc	1,758241758	0	1,758241758	1,33E-05	n.s	16,49048626	0	16,49048626	0,731145403	n.s
KHDC3L	NaN	n.s	0.00208562684615564	n.s	1,538461538	0	1,538461538	1,97E-06	n.s	5,496828753	0	5,496828753	0,107949818	n.s
NKX6-3	NaN	n.s	0.00084396174688481	n.s	6,373626374	0	6,373626374	0,171035397	n.s	13,10782241	0	13,10782241	0,635750288	n.s
KCNU1	NaN	n.s	0.304775522513755	n.s	23,95604396	0	23,95604396	0,864526262	n.s	20,93023256	0	20,93023256	0,800574287	n.s
OR1Q1	NaN	n.s	0.323917948042735	n.s	4,835164835	0	4,835164835	0,052352371	n.s	6,553911205	0	6,553911205	0,19762874	n.s
FMR1NB	NaN	n.s	0.00581210950380638	n.s	6,813186813	0	6,813186813	0,214226	n.s	2,748414376	0	2,748414376	0,002687623	n.s
FAM47A	NaN	n.s	0.02332250370061	n.s	4,395604396	0	4,395604396	0,032893993	n.s	8,245243129	0	8,245243129	0,348966088	n.s
ARHGAP36	NaN	n.s	1.46776309695133e-08	lusc	6,373626374	0	6,373626374	0,171035397	n.s	19,02748414	0	19,02748414	0,775871502	n.s
MAGEB6	NaN	n.s	2.2736532293497e-32	lusc	9,67032967	0	9,67032967	0,481112045	n.s	44,60887949	0	44,60887949	0,900385756	n.s
AWAT1	NaN	n.s	1.13333576871275e-05	n.s	9,230769231	0	9,230769231	0,445780319	n.s	2,325581395	0	2,325581395	0,000721163	n.s
H2BFWT	NaN	n.s	1.11477826738367e-68	lusc	9,010989011	0	9,010989011	0,427121179	n.s	64,90486258	0	64,90486258	0,816033085	n.s
KRT28	NaN	n.s	0.180704837236486	n.s	4,615384615	0	4,615384615	0,042148145	n.s	2,748414376	0	2,748414376	0,002687623	n.s
SPRR4	NaN	n.s	1.14196200538449e-76	lusc	0,659340659	0	0,659340659	1,56E-14	n.s	56,02536998	0	56,02536998	0,864965976	n.s
CCDC185	NaN	n.s	0.36220115241101	n.s	55,38461538	0	55,38461538	0,766314382	n.s	58,56236786	0	58,56236786	0,853720546	n.s
TTLL8	NaN	n.s	8.34415421143426e-08	lusc	9,450549451	0	9,450549451	0,463779977	n.s	22,62156448	0	22,62156448	0,818174379	n.s
RBM46	NaN	n.s	0.0735793603893302	n.s	3,736263736	0	3,736263736	0,013285131	n.s	6,553911205	0	6,553911205	0,19762874	n.s
OLIG3	NaN	n.s	0.580531538403545	n.s	7,252747253	0	7,252747253	0,258666905	n.s	6,131078224	0	6,131078224	0,160067562	n.s
GALNTL5	NaN	n.s	0.0162184478042303	n.s	6,813186813	0	6,813186813	0,214226	n.s	3,171247357	0	3,171247357	0,007090406	n.s
DDX53	NaN	n.s	0.0113665015452268	n.s	18,46153846	0	18,46153846	0,806839115	n.s	12,26215645	0	12,26215645	0,601801056	n.s
ZNF679	NaN	n.s	0.113053253769935	n.s	5,934065934	0	5,934065934	0,130578333	n.s	8,8794926	0	8,8794926	0,400489398	n.s
CNBD1	NaN	n.s	5.88089975389976e-18	lusc	7,692307692	0	7,692307692	0,303063289	n.s	30,23255814	0	30,23255814	0,868310212	n.s
FAM46D	NaN	n.s	3.30341261808709e-10	lusc	9,010989011	0	9,010989011	0,427121179	n.s	24,73572939	0	24,73572939	0,835979562	n.s
XAGE5	NaN	n.s	0.000943085049274531	n.s	5,494505495	0	5,494505495	0,094369418	n.s	11,83932347	0	11,83932347	0,582767146	n.s
COX7B2	NaN	n.s	0.000681682449351168	n.s	18,46153846	0	18,46153846	0,806839115	n.s	28,11839323	0	28,11839323	0,857700778	n.s
GSX2	NaN	n.s	0.999999999999999	n.s	5,714285714	0	5,714285714	0,111852795	n.s	5,708245243	0	5,708245243	0,124564593	n.s
C12orf77	NaN	n.s	7.25409681102254e-07	n.s	1,318681319	0	1,318681319	1,51E-07	n.s	8,66807611	0	8,66807611	0,383784797	n.s
FAM71C	NaN	n.s	0.258236476153056	n.s	3,296703297	0	3,296703297	0,005883465	n.s	1,902748414	0	1,902748414	0,000107006	n.s
CCER1	NaN	n.s	2.07477248589015e-12	lusc	1,978021978	0	1,978021978	5,78E-05	n.s	15,22198732	0	15,22198732	0,70147482	n.s
TEX37	NaN	n.s	0.59087115083253	n.s	8,571428571	0	8,571428571	0,387901866	n.s	7,399577167	0	7,399577167	0,274680866	n.s
FAM237A	NaN	n.s	9.00763854989453e-40	lusc	1,538461538	0	1,538461538	1,97E-06	n.s	35,72938689	0	35,72938689	0,889061784	n.s
GABRR3	NaN	n.s	0.495508568424447	n.s	7,472527473	0	7,472527473	0,280941555	n.s	6,131078224	0	6,131078224	0,160067562	n.s
SPEM2	NaN	n.s	8.45064963546307e-06	n.s	4,835164835	0	4,835164835	0,052352371	n.s	13,53065539	0	13,53065539	0,650889188	n.s
C7orf33	NaN	n.s	1.92653280813546e-06	n.s	3,956043956	0	3,956043956	0,018624452	n.s	12,89640592	0	12,89640592	0,627742091	n.s
PRSS55	NaN	n.s	0.929197109088416	n.s	7,032967033	0	7,032967033	0,236376804	n.s	7,399577167	0	7,399577167	0,274680866	n.s
C8orf74	NaN	n.s	4.59632040158911e-05	n.s	25,49450549	0	25,49450549	0,874729016	n.s	14,58773784	0	14,58773784	0,684184996	n.s
PAGE2	NaN	n.s	0.00071089428171645	n.s	11,20879121	0	11,20879121	0,584293685	n.s	19,45031712	0	19,45031712	0,78189862	n.s
PDILT	NaN	n.s	0.0806999274971197	n.s	2,197802198	0	2,197802198	0,00018585	n.s	0,634249471	0	0,634249471	3,43E-14	n.s
AMER3	NaN	n.s	0.00463005870582837	n.s	7,252747253	0	7,252747253	0,258666905	n.s	2,959830867	0	2,959830867	0,004544091	n.s
GSX1	NaN	n.s	0.0108377313339474	n.s	0,21978022	0	0,21978022	1,56E-14	n.s	2,325581395	0	2,325581395	0,000721163	n.s
OR4C6	NaN	n.s	0.238880754746212	n.s	11,42857143	0	11,42857143	0,596629446	n.s	8,8794926	0	8,8794926	0,400489398	n.s
OR5M11	NaN	n.s	3.52210643046399e-34	lusc	5,054945055	0	5,054945055	0,063729344	n.s	38,47780127	0	38,47780127	0,896902051	n.s
ZNF804B	NaN	n.s	0.516555804113214	n.s	2,637362637	0	2,637362637	0,001049743	n.s	3,594080338	0	3,594080338	0,014796286	n.s
FOLH1B	NaN	n.s	1.11550090140506e-12	lusc	5,714285714	0	5,714285714	0,111852795	n.s	22,1987315	0	22,1987315	0,814093086	n.s
TBATA	NaN	n.s	0.0608683381779958	n.s	3,956043956	0	3,956043956	0,018624452	n.s	6,976744186	0	6,976744186	0,236148644	n.s
OR10S1	NaN	n.s	7.32446637771005e-12	lusc	0,21978022	0	0,21978022	1,56E-14	n.s	10,78224101	0	10,78224101	0,528218081	n.s
OR6T1	NaN	n.s	0.0198940704928274	n.s	1,538461538	0	1,538461538	1,97E-06	n.s	0	0	0	NA	n.s
OR9Q1	NaN	n.s	0.0447357542475369	n.s	0,659340659	0	0,659340659	1,56E-14	n.s	2,536997886	0	2,536997886	0,00146747	n.s
CCDC83	NaN	n.s	0.121204640917764	n.s	2,637362637	0	2,637362637	0,001049743	n.s	1,057082452	0	1,057082452	1,96E-08	n.s
GTSCR1	NaN	n.s	0.717369520659788	n.s	0,43956044	0	0,43956044	1,56E-14	n.s	0,845665962	0	0,845665962	1,42E-10	n.s
CES5A	NaN	n.s	3.86106508456387e-10	lusc	1,758241758	0	1,758241758	1,33E-05	n.s	12,68498943	0	12,68498943	0,619423753	n.s
CALHM4	NaN	n.s	1.34812603497292e-08	lusc	1,538461538	0	1,538461538	1,97E-06	n.s	10,78224101	0	10,78224101	0,528218081	n.s
OPN5	NaN	n.s	0.0224973499513638	n.s	1,098901099	0	1,098901099	4,22E-09	n.s	3,594080338	0	3,594080338	0,014796286	n.s
SP8	NaN	n.s	2.42248874244996e-08	lusc	50,98901099	0	50,98901099	0,811469913	n.s	69,13319239	0	69,13319239	0,779016012	n.s
MMD2	NaN	n.s	0.999999999999999	n.s	3,516483516	0	3,516483516	0,009048815	n.s	3,594080338	0	3,594080338	0,014796286	n.s
GPRC6A	NaN	n.s	9.90003594136627e-12	lusc	8,351648352	0	8,351648352	0,367407569	n.s	25,36997886	0	25,36997886	0,840602883	n.s
LHFPL5	NaN	n.s	1.02221462433139e-13	luad	69,23076923	0	69,23076923	0,480030657	n.s	44,82029598	0	44,82029598	0,899886406	n.s
VGLL2	NaN	n.s	0.877538843478509	n.s	5,054945055	0	5,054945055	0,063729344	n.s	5,496828753	0	5,496828753	0,107949818	n.s
DEFB108B	NaN	n.s	0.948390602557612	n.s	1,318681319	0	1,318681319	1,51E-07	n.s	1,057082452	0	1,057082452	1,96E-08	n.s
EIF4E1B	NaN	n.s	3.83575434872495e-15	luad	16,26373626	0	16,26373626	0,767070301	n.s	1,479915433	0	1,479915433	5,05E-06	n.s
TMEM244	NaN	n.s	0.430690113440889	n.s	2,857142857	0	2,857142857	0,002066819	n.s	4,016913319	0	4,016913319	0,026653234	n.s
BPIFC	NaN	n.s	8.21398074885605e-19	lusc	8,571428571	0	8,571428571	0,387901866	n.s	32,34672304	0	32,34672304	0,877275882	n.s
C11orf86	NaN	n.s	6.97028325733485e-66	luad	63,51648352	0	63,51648352	0,632836567	n.s	9,302325581	0	9,302325581	0,432403301	n.s
MEIOB	NaN	n.s	0.00527611906294909	n.s	13,40659341	0	13,40659341	0,686015395	n.s	20,50739958	0	20,50739958	0,795589319	n.s
LCE5A	NaN	n.s	5.84341961495691e-09	lusc	0,879120879	0	0,879120879	1,83E-11	n.s	9,725158562	0	9,725158562	0,46227847	n.s
TXNDC8	NaN	n.s	2.18174636648477e-08	lusc	2,637362637	0	2,637362637	0,001049743	n.s	12,68498943	0	12,68498943	0,619423753	n.s
HIST1H2BA	NaN	n.s	1.4651370535838e-06	n.s	8,131868132	0	8,131868132	0,346388763	n.s	1,268498943	0	1,268498943	4,87E-07	n.s
SMCO1	NaN	n.s	1.07701804922006e-21	lusc	3,736263736	0	3,736263736	0,013285131	n.s	26,6384778	0	26,6384778	0,849035587	n.s
TMEM196	NaN	n.s	0.999999999999998	n.s	5,934065934	0	5,934065934	0,130578333	n.s	5,919661734	0	5,919661734	0,141986149	n.s
PTF1A	NaN	n.s	0.527986825343542	n.s	1,538461538	0	1,538461538	1,97E-06	n.s	2,325581395	0	2,325581395	0,000721163	n.s
CCDC197	NaN	n.s	2.00043986744719e-05	n.s	1,978021978	0	1,978021978	5,78E-05	n.s	8,456659619	0	8,456659619	0,36660228	n.s
GPX6	NaN	n.s	0.011222757514421	n.s	1,538461538	0	1,538461538	1,97E-06	n.s	4,651162791	0	4,651162791	0,052230559	n.s
WFDC11	NaN	n.s	4.01185280553797e-08	luad	7,692307692	0	7,692307692	0,303063289	n.s	0,422832981	0	0,422832981	2,24E-14	n.s
MRGPRX1	NaN	n.s	2.21708677412975e-07	lusc	0,879120879	0	0,879120879	1,83E-11	n.s	8,245243129	0	8,245243129	0,348966088	n.s
TAS2R46	NaN	n.s	0.0707417853686196	n.s	2,417582418	0	2,417582418	0,000478719	n.s	4,862579281	0	4,862579281	0,064318205	n.s
PYDC1	NaN	n.s	9.03935278873862e-11	lusc	13,62637363	0	13,62637363	0,693928181	n.s	31,71247357	0	31,71247357	0,874735223	n.s
MAGEA2B	NaN	n.s	1.58569332932108e-05	n.s	7,252747253	0	7,252747253	0,258666905	n.s	16,70190275	0	16,70190275	0,735541931	n.s
IFNL2	NaN	n.s	0.00654175388373189	n.s	9,67032967	0	9,67032967	0,481112045	n.s	15,85623679	0	15,85623679	0,717057257	n.s
IFNL3	NaN	n.s	0.0778801585500697	n.s	11,64835165	0	11,64835165	0,608425629	n.s	15,85623679	0	15,85623679	0,717057257	n.s
OR51B5	NaN	n.s	0.000704593381497435	n.s	4,615384615	0	4,615384615	0,042148145	n.s	10,78224101	0	10,78224101	0,528218081	n.s
C10orf126	NaN	n.s	0.54603297625815	n.s	8,571428571	0	8,571428571	0,387901866	n.s	9,936575053	0	9,936575053	0,476451783	n.s
TRIM49B	NaN	n.s	4.16384722664903e-07	lusc	2,417582418	0	2,417582418	0,000478719	n.s	10,99365751	0	10,99365751	0,539984328	n.s
FOXR1	NaN	n.s	0.999999999999998	n.s	2,417582418	0	2,417582418	0,000478719	n.s	2,536997886	0	2,536997886	0,00146747	n.s
OR8D1	NaN	n.s	0.00147765150012253	n.s	1,318681319	0	1,318681319	1,51E-07	n.s	5,285412262	0	5,285412262	0,092284465	n.s
C11orf44	NaN	n.s	0.396107865321402	n.s	11,86813187	0	11,86813187	0,619704692	n.s	13,95348837	0	13,95348837	0,664941562	n.s
C12orf40	NaN	n.s	0.786191572669276	n.s	2,857142857	0	2,857142857	0,002066819	n.s	3,382663848	0	3,382663848	0,01036677	n.s
C14orf177	NaN	n.s	2.57456483917828e-05	n.s	0	0	0	NA	n.s	4,22832981	0	4,22832981	0,033934328	n.s
GOLGA6L2	NaN	n.s	9.77177235112741e-42	lusc	5,274725275	0	5,274725275	0,078285304	n.s	43,97463002	0	43,97463002	0,901857868	n.s
GOLGA8G	NaN	n.s	5.64872923470537e-05	n.s	1,538461538	0	1,538461538	1,97E-06	n.s	7,188160677	0	7,188160677	0,25546501	n.s
FAM169B	NaN	n.s	2.21215053539693e-17	luad	25,49450549	0	25,49450549	0,874729016	n.s	5,285412262	0	5,285412262	0,092284465	n.s
CLEC18C	NaN	n.s	0.884220147476961	n.s	5,274725275	0	5,274725275	0,078285304	n.s	5,708245243	0	5,708245243	0,124564593	n.s
TMEM235	NaN	n.s	1.37344554343374e-08	lusc	0,21978022	0	0,21978022	1,56E-14	n.s	7,822410148	0	7,822410148	0,312472118	n.s
DYNAP	NaN	n.s	6.89393966972049e-25	lusc	3,956043956	0	3,956043956	0,018624452	n.s	29,59830867	0	29,59830867	0,865319512	n.s
BOD1L2	NaN	n.s	0.953362392512315	n.s	1,098901099	0	1,098901099	4,22E-09	n.s	0,845665962	0	0,845665962	1,42E-10	n.s
SMIM21	NaN	n.s	0.0586273450485522	n.s	3,956043956	0	3,956043956	0,018624452	n.s	1,691331924	0	1,691331924	2,85E-05	n.s
KLK9	NaN	n.s	8.76644739060531e-56	lusc	3,076923077	0	3,076923077	0,003614893	n.s	48,8372093	0	48,8372093	0,88947666	n.s
ACTL9	NaN	n.s	0.121204640917764	n.s	2,637362637	0	2,637362637	0,001049743	n.s	1,057082452	0	1,057082452	1,96E-08	n.s
FAM71E2	NaN	n.s	4.71079639519357e-07	lusc	3,296703297	0	3,296703297	0,005883465	n.s	12,47357294	0	12,47357294	0,610781478	n.s
OR14A16	NaN	n.s	0.0509782677232628	n.s	0,21978022	0	0,21978022	1,56E-14	n.s	1,691331924	0	1,691331924	2,85E-05	n.s
IQCM	NaN	n.s	5.91172067919478e-41	lusc	16,92307692	0	16,92307692	0,780548478	n.s	60,0422833	0	60,0422833	0,846306167	n.s
CNPY1	NaN	n.s	3.42093982094962e-06	n.s	9,230769231	0	9,230769231	0,445780319	n.s	20,29598309	0	20,29598309	0,792996833	n.s
NKAIN3	NaN	n.s	9.0502274629622e-18	luad	36,92307692	0	36,92307692	0,893129878	n.s	12,47357294	0	12,47357294	0,610781478	n.s
SPATA31E1	NaN	n.s	0.986994850610745	n.s	4,835164835	0	4,835164835	0,052352371	n.s	5,073995772	0	5,073995772	0,077701469	n.s
H2BFM	NaN	n.s	3.92557985460422e-52	lusc	2,417582418	0	2,417582418	0,000478719	n.s	45,45454545	0	45,45454545	0,898361524	n.s
VN1R5	NaN	n.s	0.18042973449485	n.s	2,417582418	0	2,417582418	0,000478719	n.s	1,057082452	0	1,057082452	1,96E-08	n.s
HIST2H2AB	NaN	n.s	0.86004730051167	n.s	12,08791209	0	12,08791209	0,630489081	n.s	12,68498943	0	12,68498943	0,619423753	n.s
KRTAP7-1	NaN	n.s	3.70324864042017e-07	lusc	0,879120879	0	0,879120879	1,83E-11	n.s	8,033826638	0	8,033826638	0,33090875	n.s
KRTAP11-1	NaN	n.s	0.0791737065148754	n.s	0,43956044	0	0,43956044	1,56E-14	n.s	1,902748414	0	1,902748414	0,000107006	n.s
KRTAP19-1	NaN	n.s	1.66963447982738e-75	lusc	0,879120879	0	0,879120879	1,83E-11	n.s	55,81395349	0	55,81395349	0,865829632	n.s
KRTAP13-2	NaN	n.s	0.284714318124561	n.s	2,197802198	0	2,197802198	0,00018585	n.s	3,594080338	0	3,594080338	0,014796286	n.s
KRTAP19-3	NaN	n.s	0.00701226259926392	n.s	0,43956044	0	0,43956044	1,56E-14	n.s	2,959830867	0	2,959830867	0,004544091	n.s
KRTAP19-5	NaN	n.s	3.53530049773986e-05	n.s	1,538461538	0	1,538461538	1,97E-06	n.s	7,399577167	0	7,399577167	0,274680866	n.s
KRTAP20-2	NaN	n.s	0.000640217006585298	n.s	0,879120879	0	0,879120879	1,83E-11	n.s	4,862579281	0	4,862579281	0,064318205	n.s
KRTAP21-2	NaN	n.s	9.23325772158354e-05	n.s	0,879120879	0	0,879120879	1,83E-11	n.s	5,708245243	0	5,708245243	0,124564593	n.s
NLRP10	NaN	n.s	1.86836734210779e-21	lusc	1,318681319	0	1,318681319	1,51E-07	n.s	21,56448203	0	21,56448203	0,807587006	n.s
S100A7A	NaN	n.s	1.75506133846958e-74	lusc	8,351648352	0	8,351648352	0,367407569	n.s	66,80761099	0	66,80761099	0,80092201	n.s
TAS2R60	NaN	n.s	0.104757203937484	n.s	3,956043956	0	3,956043956	0,018624452	n.s	6,553911205	0	6,553911205	0,19762874	n.s
DUPD1	NaN	n.s	0.999999999999999	n.s	0,43956044	0	0,43956044	1,56E-14	n.s	0,422832981	0	0,422832981	2,24E-14	n.s
OR52L1	NaN	n.s	3.86106508456387e-10	lusc	1,758241758	0	1,758241758	1,33E-05	n.s	12,68498943	0	12,68498943	0,619423753	n.s
OR2AG2	NaN	n.s	0.401373695888645	n.s	6,813186813	0	6,813186813	0,214226	n.s	5,285412262	0	5,285412262	0,092284465	n.s
C1QL4	NaN	n.s	4.74659087959358e-39	lusc	20,21978022	0	20,21978022	0,830169191	n.s	62,79069767	0	62,79069767	0,830470481	n.s
SLCO1B7	NaN	n.s	0.901099020620563	n.s	14,50549451	0	14,50549451	0,722403114	n.s	15,01057082	0	15,01057082	0,695912696	n.s
TMEM202	NaN	n.s	6.68240440146174e-08	lusc	0,659340659	0	0,659340659	1,56E-14	n.s	8,245243129	0	8,245243129	0,348966088	n.s
TMEM95	NaN	n.s	0.0603891690145342	n.s	0,879120879	0	0,879120879	1,83E-11	n.s	2,748414376	0	2,748414376	0,002687623	n.s
PRSS38	NaN	n.s	0.00169261648733877	n.s	3,076923077	0	3,076923077	0,003614893	n.s	8,033826638	0	8,033826638	0,33090875	n.s
SLC6A19	NaN	n.s	0.473460913337514	n.s	3,076923077	0	3,076923077	0,003614893	n.s	2,114164905	0	2,114164905	0,000303668	n.s
DPPA5	NaN	n.s	0.299437885429551	n.s	3,296703297	0	3,296703297	0,005883465	n.s	4,862579281	0	4,862579281	0,064318205	n.s
CLPSL1	NaN	n.s	4.60947796058469e-05	n.s	38,02197802	0	38,02197802	0,888888804	n.s	25,36997886	0	25,36997886	0,840602883	n.s
UNCX	NaN	n.s	0.000290002338338611	n.s	0,21978022	0	0,21978022	1,56E-14	n.s	3,805496829	0	3,805496829	0,020214634	n.s
POTEA	NaN	n.s	0.000244552606132891	n.s	0,879120879	0	0,879120879	1,83E-11	n.s	5,285412262	0	5,285412262	0,092284465	n.s
PABPC1L2A	NaN	n.s	5.12734682476392e-06	n.s	5,934065934	0	5,934065934	0,130578333	n.s	15,43340381	0	15,43340381	0,706847508	n.s
SATL1	NaN	n.s	0.000238254648288122	n.s	1,318681319	0	1,318681319	1,51E-07	n.s	6,131078224	0	6,131078224	0,160067562	n.s
RTL4	NaN	n.s	0.999999999999998	n.s	2,417582418	0	2,417582418	0,000478719	n.s	2,536997886	0	2,536997886	0,00146747	n.s
LRIT2	NaN	n.s	4.36298084678918e-20	lusc	0,879120879	0	0,879120879	1,83E-11	n.s	19,45031712	0	19,45031712	0,78189862	n.s
HMX3	NaN	n.s	3.53530049773986e-05	n.s	1,538461538	0	1,538461538	1,97E-06	n.s	7,399577167	0	7,399577167	0,274680866	n.s
OR52B6	NaN	n.s	0.122973895305291	n.s	0,879120879	0	0,879120879	1,83E-11	n.s	0	0	0	NA	n.s
OTOG	NaN	n.s	8.56837758148533e-15	lusc	19,78021978	0	19,78021978	0,824885539	n.s	43,76321353	0	43,76321353	0,902340131	n.s
OR6C2	NaN	n.s	1.03381773047473e-29	lusc	0,879120879	0	0,879120879	1,83E-11	n.s	27,06131078	0	27,06131078	0,851630431	n.s
VSTM2B	NaN	n.s	0.0859239620863731	n.s	2,197802198	0	2,197802198	0,00018585	n.s	4,4397463	0	4,4397463	0,041843083	n.s
LEUTX	NaN	n.s	0.029323524819767	n.s	1,318681319	0	1,318681319	1,51E-07	n.s	3,805496829	0	3,805496829	0,020214634	n.s
RFPL4A	NaN	n.s	0.496164160340585	n.s	0	0	0	NA	n.s	0,422832981	0	0,422832981	2,24E-14	n.s
BARHL2	NaN	n.s	0.22388924724403	n.s	8,791208791	0	8,791208791	0,407819354	n.s	11,41649049	0	11,41649049	0,562202164	n.s
TGM6	NaN	n.s	2.08116734092032e-27	lusc	1,098901099	0	1,098901099	4,22E-09	n.s	25,79281184	0	25,79281184	0,843528333	n.s
MSGN1	NaN	n.s	1.47255395624593e-60	lusc	0,879120879	0	0,879120879	1,83E-11	n.s	47,56871036	0	47,56871036	0,892966866	n.s
EVX2	NaN	n.s	6.45393290309883e-22	lusc	11,20879121	0	11,20879121	0,584293685	n.s	38,90063425	0	38,90063425	0,897997523	n.s
SAMD7	NaN	n.s	0.473460913337514	n.s	3,076923077	0	3,076923077	0,003614893	n.s	2,114164905	0	2,114164905	0,000303668	n.s
GPR149	NaN	n.s	3.35107897537057e-38	lusc	0,659340659	0	0,659340659	1,56E-14	n.s	32,76955603	0	32,76955603	0,878905289	n.s
PAQR9	NaN	n.s	1.29283862855935e-12	lusc	4,615384615	0	4,615384615	0,042148145	n.s	20,29598309	0	20,29598309	0,792996833	n.s
RTP2	NaN	n.s	0.299437885429551	n.s	3,296703297	0	3,296703297	0,005883465	n.s	4,862579281	0	4,862579281	0,064318205	n.s
PFN3	NaN	n.s	0.241532546579399	n.s	3,076923077	0	3,076923077	0,003614893	n.s	1,691331924	0	1,691331924	2,85E-05	n.s
sept-14	NaN	n.s	0.677721115495851	n.s	9,010989011	0	9,010989011	0,427121179	n.s	8,033826638	0	8,033826638	0,33090875	n.s
GNAT3	NaN	n.s	0.00101810616853168	n.s	4,175824176	0	4,175824176	0,025035949	n.s	9,936575053	0	9,936575053	0,476451783	n.s
MOGAT3	NaN	n.s	0.00390084495427142	n.s	8,571428571	0	8,571428571	0,387901866	n.s	3,805496829	0	3,805496829	0,020214634	n.s
STRA8	NaN	n.s	3.35892527770338e-08	lusc	18,24175824	0	18,24175824	0,803465788	n.s	34,46088795	0	34,46088795	0,884957039	n.s
ADGRD2	NaN	n.s	7.70829801749754e-60	lusc	10,76923077	0	10,76923077	0,557915295	n.s	62,79069767	0	62,79069767	0,830470481	n.s
OR1J1	NaN	n.s	4.45932878774406e-07	lusc	4,175824176	0	4,175824176	0,025035949	n.s	13,95348837	0	13,95348837	0,664941562	n.s
DCAF8L2	NaN	n.s	0.0109251099711131	n.s	9,67032967	0	9,67032967	0,481112045	n.s	15,43340381	0	15,43340381	0,706847508	n.s
DGAT2L6	NaN	n.s	5.67893759429671e-09	luad	7,912087912	0	7,912087912	0,324912763	n.s	0,21141649	0	0,21141649	2,24E-14	n.s
ARSH	NaN	n.s	0.00667051465561064	n.s	68,79120879	0	68,79120879	0,493822693	n.s	60,0422833	0	60,0422833	0,846306167	n.s
CENPVL3	NaN	n.s	0.000180373945749505	n.s	2,857142857	0	2,857142857	0,002066819	n.s	8,8794926	0	8,8794926	0,400489398	n.s
OTOP3	NaN	n.s	3.39655483494652e-51	lusc	3,076923077	0	3,076923077	0,003614893	n.s	46,08879493	0	46,08879493	0,896794986	n.s
TBX10	NaN	n.s	0.0877497165552849	n.s	20,43956044	0	20,43956044	0,832690821	n.s	25,36997886	0	25,36997886	0,840602883	n.s
SELENOV	NaN	n.s	1.89692947578966e-16	lusc	7,472527473	0	7,472527473	0,280941555	n.s	28,54122622	0	28,54122622	0,859975681	n.s
SLC6A18	NaN	n.s	8.76394277238989e-09	luad	8,791208791	0	8,791208791	0,407819354	n.s	0,634249471	0	0,634249471	3,43E-14	n.s
LCE1A	NaN	n.s	8.5086997706565e-12	lusc	0	0	0	NA	n.s	10,14799154	0	10,14799154	0,490122766	n.s
LCE1B	NaN	n.s	3.50889432386298e-43	lusc	0,43956044	0	0,43956044	1,56E-14	n.s	35,72938689	0	35,72938689	0,889061784	n.s
LCE1C	NaN	n.s	5.31599888869575e-82	lusc	0,43956044	0	0,43956044	1,56E-14	n.s	58,35095137	0	58,35095137	0,854724687	n.s
LCE1E	NaN	n.s	1.2072721977428e-29	lusc	0,43956044	0	0,43956044	1,56E-14	n.s	26,00422833	0	26,00422833	0,844946821	n.s
LCE1F	NaN	n.s	9.29511233443916e-63	lusc	0,43956044	0	0,43956044	1,56E-14	n.s	47,99154334	0	47,99154334	0,891825894	n.s
LCE2A	NaN	n.s	3.28074343398921e-07	lusc	0,21978022	0	0,21978022	1,56E-14	n.s	6,553911205	0	6,553911205	0,19762874	n.s
LCE2C	NaN	n.s	6.58541372838846e-13	lusc	0,43956044	0	0,43956044	1,56E-14	n.s	12,26215645	0	12,26215645	0,601801056	n.s
LCE2D	NaN	n.s	3.25040865935425e-10	lusc	0,21978022	0	0,21978022	1,56E-14	n.s	9,302325581	0	9,302325581	0,432403301	n.s
LCE3A	NaN	n.s	3.21306598957729e-55	lusc	1,758241758	0	1,758241758	1,33E-05	n.s	46,08879493	0	46,08879493	0,896794986	n.s
LCE3C	NaN	n.s	1.85778280842557e-08	lusc	0,43956044	0	0,43956044	1,56E-14	n.s	8,245243129	0	8,245243129	0,348966088	n.s
LCE3E	NaN	n.s	1.02363012956946e-65	lusc	3,516483516	0	3,516483516	0,009048815	n.s	55,17970402	0	55,17970402	0,868359264	n.s
RGSL1	NaN	n.s	3.43312448627461e-30	lusc	2,197802198	0	2,197802198	0,00018585	n.s	30,23255814	0	30,23255814	0,868310212	n.s
BPIFB3	NaN	n.s	0.000396301345077781	n.s	0,879120879	0	0,879120879	1,83E-11	n.s	5,073995772	0	5,073995772	0,077701469	n.s
NANOGNB	NaN	n.s	8.47204686217496e-05	n.s	1,758241758	0	1,758241758	1,33E-05	n.s	7,399577167	0	7,399577167	0,274680866	n.s
PRAC2	NaN	n.s	0.000449156881134226	n.s	27,03296703	0	27,03296703	0,88336279	n.s	38,05496829	0	38,05496829	0,895779191	n.s
CCDC172	NaN	n.s	0.00385587283567869	n.s	0,21978022	0	0,21978022	1,56E-14	n.s	2,748414376	0	2,748414376	0,002687623	n.s
KRT77	NaN	n.s	8.06435560790938e-95	lusc	1,758241758	0	1,758241758	1,33E-05	n.s	66,5961945	0	66,5961945	0,802714298	n.s
SPEM1	NaN	n.s	7.41497371607136e-05	n.s	4,615384615	0	4,615384615	0,042148145	n.s	12,05073996	0	12,05073996	0,592467909	n.s
ANKRD30B	NaN	n.s	0.92143807585718	n.s	2,637362637	0	2,637362637	0,001049743	n.s	2,959830867	0	2,959830867	0,004544091	n.s
IGFL1	NaN	n.s	5.41611709670771e-64	lusc	14,50549451	0	14,50549451	0,722403114	n.s	69,55602537	0	69,55602537	0,774549693	n.s
AQP12A	NaN	n.s	0.30011430003451	n.s	3,956043956	0	3,956043956	0,018624452	n.s	2,536997886	0	2,536997886	0,00146747	n.s
NAT16	NaN	n.s	4.77384266883576e-06	n.s	18,68131868	0	18,68131868	0,810100082	n.s	8,245243129	0	8,245243129	0,348966088	n.s
CATSPER4	NaN	n.s	0.379252770397453	n.s	5,934065934	0	5,934065934	0,130578333	n.s	4,4397463	0	4,4397463	0,041843083	n.s
IL31	NaN	n.s	1.12547244845558e-07	lusc	0,659340659	0	0,659340659	1,56E-14	n.s	8,033826638	0	8,033826638	0,33090875	n.s
KRTAP10-2	NaN	n.s	1.02194409985274e-09	lusc	5,714285714	0	5,714285714	0,111852795	n.s	19,23890063	0	19,23890063	0,778927516	n.s
KRTAP10-3	NaN	n.s	0.372214021215536	n.s	0,659340659	0	0,659340659	1,56E-14	n.s	1,479915433	0	1,479915433	5,05E-06	n.s
MRGPRG	NaN	n.s	0.389263613929428	n.s	3,736263736	0	3,736263736	0,013285131	n.s	2,536997886	0	2,536997886	0,00146747	n.s
NPSR1	NaN	n.s	1.42745317282398e-23	lusc	43,73626374	0	43,73626374	0,862106673	n.s	76,10993658	0	76,10993658	0,677213436	n.s
KRTAP5-4	NaN	n.s	0.159292280934563	n.s	4,175824176	0	4,175824176	0,025035949	n.s	2,325581395	0	2,325581395	0,000721163	n.s
TBPL2	NaN	n.s	0.0734202774454856	n.s	3,076923077	0	3,076923077	0,003614893	n.s	5,708245243	0	5,708245243	0,124564593	n.s
C10orf113	NaN	n.s	0.350426854061422	n.s	5,054945055	0	5,054945055	0,063729344	n.s	3,594080338	0	3,594080338	0,014796286	n.s
C10orf99	NaN	n.s	5.51947164373197e-118	lusc	3,296703297	0	3,296703297	0,005883465	n.s	78,22410148	0	78,22410148	0,629285589	n.s
TEX36	NaN	n.s	4.14701583656076e-05	n.s	2,417582418	0	2,417582418	0,000478719	n.s	8,8794926	0	8,8794926	0,400489398	n.s
CLEC2A	NaN	n.s	0.00668889390512207	n.s	4,395604396	0	4,395604396	0,032893993	n.s	9,090909091	0	9,090909091	0,416699121	n.s
RTL1	NaN	n.s	0.074880976192102	n.s	10,98901099	0	10,98901099	0,571396158	n.s	7,399577167	0	7,399577167	0,274680866	n.s
PRR25	NaN	n.s	0.506572283816815	n.s	8,351648352	0	8,351648352	0,367407569	n.s	6,976744186	0	6,976744186	0,236148644	n.s
TMIGD1	NaN	n.s	0.753665960385083	n.s	2,417582418	0	2,417582418	0,000478719	n.s	1,902748414	0	1,902748414	0,000107006	n.s
BTBD17	NaN	n.s	0.176608687201425	n.s	9,67032967	0	9,67032967	0,481112045	n.s	12,68498943	0	12,68498943	0,619423753	n.s
PVALEF	NaN	n.s	0.567142677386195	n.s	6,153846154	0	6,153846154	0,150368874	n.s	5,073995772	0	5,073995772	0,077701469	n.s
IGFL3	NaN	n.s	2.4372142932215e-29	lusc	12,96703297	0	12,96703297	0,669117069	n.s	47,14587738	0	47,14587738	0,894086316	n.s
TMEM82	NaN	n.s	3.10839457273438e-44	luad	42,41758242	0	42,41758242	0,86909251	n.s	3,805496829	0	3,805496829	0,020214634	n.s
TMEM247	NaN	n.s	0.0641428909132371	n.s	1,758241758	0	1,758241758	1,33E-05	n.s	4,016913319	0	4,016913319	0,026653234	n.s
C2orf80	NaN	n.s	0.462394150603265	n.s	1,098901099	0	1,098901099	4,22E-09	n.s	1,902748414	0	1,902748414	0,000107006	n.s
PLSCR5	NaN	n.s	0.0707417853686196	n.s	2,417582418	0	2,417582418	0,000478719	n.s	4,862579281	0	4,862579281	0,064318205	n.s
TMPRSS11F	NaN	n.s	6.70215491667891e-120	lusc	3,076923077	0	3,076923077	0,003614893	n.s	78,64693446	0	78,64693446	0,61832139	n.s
LRRC14B	NaN	n.s	1.65175525175006e-06	n.s	25,93406593	0	25,93406593	0,877340059	n.s	41,01479915	0	41,01479915	0,90309881	n.s
SMIM32	NaN	n.s	0.171145112624289	n.s	8,131868132	0	8,131868132	0,346388763	n.s	10,99365751	0	10,99365751	0,539984328	n.s
CLPSL2	NaN	n.s	5.53756380627563e-21	luad	48,35164835	0	48,35164835	0,83267788	n.s	19,02748414	0	19,02748414	0,775871502	n.s
GLYATL3	NaN	n.s	0.0229020066179432	n.s	6,373626374	0	6,373626374	0,171035397	n.s	10,78224101	0	10,78224101	0,528218081	n.s
LIN28B	NaN	n.s	3.04080542935014e-15	lusc	18,9010989	0	18,9010989	0,813253689	n.s	43,12896406	0	43,12896406	0,903762431	n.s
C8orf86	NaN	n.s	0.0641428909132371	n.s	1,758241758	0	1,758241758	1,33E-05	n.s	4,016913319	0	4,016913319	0,026653234	n.s
SPATA31A6	NaN	n.s	1.863266159025e-06	n.s	1,098901099	0	1,098901099	4,22E-09	n.s	7,822410148	0	7,822410148	0,312472118	n.s
SPATA31D1	NaN	n.s	0.108980268061135	n.s	3,296703297	0	3,296703297	0,005883465	n.s	1,479915433	0	1,479915433	5,05E-06	n.s
PAGE2B	NaN	n.s	0.783331235532491	n.s	8,571428571	0	8,571428571	0,387901866	n.s	9,302325581	0	9,302325581	0,432403301	n.s
CSAG3	NaN	n.s	3.99362922144151e-24	lusc	19,12087912	0	19,12087912	0,81630467	n.s	51,1627907	0	51,1627907	0,88250976	n.s
NKX1-2	NaN	n.s	5.36114591382135e-19	lusc	50,76923077	0	50,76923077	0,813384402	n.s	78,85835095	0	78,85835095	0,61264752	n.s
OR51Q1	NaN	n.s	2.77566648372829e-07	lusc	1,538461538	0	1,538461538	1,97E-06	n.s	9,513742072	0	9,513742072	0,447596662	n.s
OR51I1	NaN	n.s	0.240832720708375	n.s	1,758241758	0	1,758241758	1,33E-05	n.s	3,171247357	0	3,171247357	0,007090406	n.s
OR51I2	NaN	n.s	1	n.s	1,098901099	0	1,098901099	4,22E-09	n.s	1,057082452	0	1,057082452	1,96E-08	n.s
OR52H1	NaN	n.s	0.0671183888119863	n.s	1,538461538	0	1,538461538	1,97E-06	n.s	0,21141649	0	0,21141649	2,24E-14	n.s
OR52E6	NaN	n.s	0.568811102176543	n.s	5,054945055	0	5,054945055	0,063729344	n.s	6,131078224	0	6,131078224	0,160067562	n.s
OR52E8	NaN	n.s	4.54594942241972e-05	n.s	0,43956044	0	0,43956044	1,56E-14	n.s	5,073995772	0	5,073995772	0,077701469	n.s
OR56A3	NaN	n.s	0.0123395882560912	n.s	9,230769231	0	9,230769231	0,445780319	n.s	14,79915433	0	14,79915433	0,690152456	n.s
OR56A5	NaN	n.s	7.07046374612473e-20	lusc	3,076923077	0	3,076923077	0,003614893	n.s	23,89006342	0	23,89006342	0,829333015	n.s
OR5AK2	NaN	n.s	NaN	n.s	0	0	0	NA	n.s	0	0	0	NA	n.s
BSX	NaN	n.s	0.911964958623231	n.s	2,417582418	0	2,417582418	0,000478719	n.s	2,748414376	0	2,748414376	0,002687623	n.s
OR8A1	NaN	n.s	0.000279877342552297	n.s	4,395604396	0	4,395604396	0,032893993	n.s	10,99365751	0	10,99365751	0,539984328	n.s
OR6C70	NaN	n.s	3.0558658249106e-47	lusc	0,659340659	0	0,659340659	1,56E-14	n.s	38,90063425	0	38,90063425	0,897997523	n.s
OR11H4	NaN	n.s	3.39032771097921e-20	lusc	0,659340659	0	0,659340659	1,56E-14	n.s	19,02748414	0	19,02748414	0,775871502	n.s
OR5AU1	NaN	n.s	0.00599645623949889	n.s	4,835164835	0	4,835164835	0,052352371	n.s	1,479915433	0	1,479915433	5,05E-06	n.s
C1QTNF8	NaN	n.s	0.417674823270529	n.s	1,098901099	0	1,098901099	4,22E-09	n.s	0,422832981	0	0,422832981	2,24E-14	n.s
PRAMEF12	NaN	n.s	0.637236742949102	n.s	2,637362637	0	2,637362637	0,001049743	n.s	3,382663848	0	3,382663848	0,01036677	n.s
SPINT4	NaN	n.s	1.2717807645624e-08	luad	7,032967033	0	7,032967033	0,236376804	n.s	0	0	0	NA	n.s
DYTN	NaN	n.s	4.15795564408258e-06	n.s	0,659340659	0	0,659340659	1,56E-14	n.s	6,553911205	0	6,553911205	0,19762874	n.s
OR10AC1	NaN	n.s	0.158088197584755	n.s	2,857142857	0	2,857142857	0,002066819	n.s	4,862579281	0	4,862579281	0,064318205	n.s
USP17L7	NaN	n.s	0.241532546579399	n.s	3,076923077	0	3,076923077	0,003614893	n.s	1,691331924	0	1,691331924	2,85E-05	n.s
OR1L6	NaN	n.s	0.0671183888119863	n.s	1,538461538	0	1,538461538	1,97E-06	n.s	0,21141649	0	0,21141649	2,24E-14	n.s
LCN9	NaN	n.s	0.425266138268028	n.s	2,417582418	0	2,417582418	0,000478719	n.s	1,479915433	0	1,479915433	5,05E-06	n.s
CTXN2	NaN	n.s	0.753665960385083	n.s	2,417582418	0	2,417582418	0,000478719	n.s	1,902748414	0	1,902748414	0,000107006	n.s
C10orf120	NaN	n.s	5.33242082933209e-07	lusc	0,659340659	0	0,659340659	1,56E-14	n.s	7,399577167	0	7,399577167	0,274680866	n.s
PATE2	NaN	n.s	0.999999999999999	n.s	8,351648352	0	8,351648352	0,367407569	n.s	8,245243129	0	8,245243129	0,348966088	n.s
PATE4	NaN	n.s	0.023006094522403	n.s	6,593406593	0	6,593406593	0,19238467	n.s	3,171247357	0	3,171247357	0,007090406	n.s
C17orf102	NaN	n.s	0.425266138268028	n.s	2,417582418	0	2,417582418	0,000478719	n.s	1,479915433	0	1,479915433	5,05E-06	n.s
TEX19	NaN	n.s	0.0112446107171766	n.s	21,31868132	0	21,31868132	0,84205036	n.s	28,75264271	0	28,75264271	0,861082641	n.s
ASB18	NaN	n.s	0.304859553025473	n.s	2,417582418	0	2,417582418	0,000478719	n.s	3,805496829	0	3,805496829	0,020214634	n.s
C3orf85	NaN	n.s	0.497080368679462	n.s	2,417582418	0	2,417582418	0,000478719	n.s	3,382663848	0	3,382663848	0,01036677	n.s
FOXL2NB	NaN	n.s	7.1941543345199e-55	lusc	16,04395604	0	16,04395604	0,762226836	n.s	66,80761099	0	66,80761099	0,80092201	n.s
PRR27	NaN	n.s	1.30356810240666e-09	lusc	0,43956044	0	0,43956044	1,56E-14	n.s	9,302325581	0	9,302325581	0,432403301	n.s
MCCD1	NaN	n.s	2.11341717158862e-13	luad	12,30769231	0	12,30769231	0,640801001	n.s	0,422832981	0	0,422832981	2,24E-14	n.s
C7orf65	NaN	n.s	0.000334459827408527	n.s	4,175824176	0	4,175824176	0,025035949	n.s	10,57082452	0	10,57082452	0,515994466	n.s
SOHLH1	NaN	n.s	7.09693189715796e-45	lusc	11,64835165	0	11,64835165	0,608425629	n.s	55,602537	0	55,602537	0,866682942	n.s
DNAJB3	NaN	n.s	5.73513256380721e-61	lusc	14,50549451	0	14,50549451	0,722403114	n.s	68,07610994	0	68,07610994	0,789499619	n.s
C10orf62	NaN	n.s	2.21227538332448e-13	lusc	1,758241758	0	1,758241758	1,33E-05	n.s	15,6448203	0	15,6448203	0,712039028	n.s
DDI1	NaN	n.s	0.0594356997907937	n.s	1,978021978	0	1,978021978	5,78E-05	n.s	0,422832981	0	0,422832981	2,24E-14	n.s
BLID	NaN	n.s	3.35604943679146e-05	n.s	6,813186813	0	6,813186813	0,214226	n.s	1,268498943	0	1,268498943	4,87E-07	n.s
VCX3B	NaN	n.s	0.0192720719017058	n.s	4,615384615	0	4,615384615	0,042148145	n.s	8,66807611	0	8,66807611	0,383784797	n.s
RGS21	NaN	n.s	0.127516758204754	n.s	1,758241758	0	1,758241758	1,33E-05	n.s	3,594080338	0	3,594080338	0,014796286	n.s
LHX8	NaN	n.s	1.6674272001002e-10	lusc	16,48351648	0	16,48351648	0,771732648	n.s	35,09513742	0	35,09513742	0,887052233	n.s
KRTAP5-5	NaN	n.s	0.653517087278917	n.s	2,857142857	0	2,857142857	0,002066819	n.s	3,594080338	0	3,594080338	0,014796286	n.s
KRTAP5-6	NaN	n.s	1.14972873729136e-08	lusc	4,175824176	0	4,175824176	0,025035949	n.s	15,6448203	0	15,6448203	0,712039028	n.s
DBX2	NaN	n.s	2.64631246084304e-19	lusc	0,43956044	0	0,43956044	1,56E-14	n.s	17,7589852	0	17,7589852	0,755548798	n.s
GOLGA6L22	NaN	n.s	1.07712394835716e-06	n.s	4,175824176	0	4,175824176	0,025035949	n.s	13,53065539	0	13,53065539	0,650889188	n.s
PSG8	NaN	n.s	0.0953578214582579	n.s	5,274725275	0	5,274725275	0,078285304	n.s	8,245243129	0	8,245243129	0,348966088	n.s
ETV3L	NaN	n.s	1.66422662244643e-08	lusc	0,879120879	0	0,879120879	1,83E-11	n.s	9,302325581	0	9,302325581	0,432403301	n.s
PIWIL3	NaN	n.s	0.00293418804228688	n.s	11,64835165	0	11,64835165	0,608425629	n.s	5,919661734	0	5,919661734	0,141986149	n.s
MARCH11	NaN	n.s	5.57010927053572e-07	n.s	8,351648352	0	8,351648352	0,367407569	n.s	20,0845666	0	20,0845666	0,790334282	n.s
ZNF716	NaN	n.s	0.970202534392367	n.s	13,40659341	0	13,40659341	0,686015395	n.s	13,10782241	0	13,10782241	0,635750288	n.s
SPATA31C1	NaN	n.s	0.000942452235397002	n.s	1,318681319	0	1,318681319	1,51E-07	n.s	5,496828753	0	5,496828753	0,107949818	n.s
CT45A3	NaN	n.s	1.18498112485622e-17	lusc	2,417582418	0	2,417582418	0,000478719	n.s	20,71881607	0	20,71881607	0,798114318	n.s
CT45A5	NaN	n.s	1.48813133403335e-14	lusc	3,956043956	0	3,956043956	0,018624452	n.s	20,93023256	0	20,93023256	0,800574287	n.s
FRG2B	NaN	n.s	0.049637951834651	n.s	4,835164835	0	4,835164835	0,052352371	n.s	8,245243129	0	8,245243129	0,348966088	n.s
BECN2	NaN	n.s	2.31994893489457e-08	luad	32,96703297	0	32,96703297	0,906526294	n.s	16,91331924	0	16,91331924	0,739799215	n.s
SULT1C3	NaN	n.s	0.0462432191307435	n.s	4,395604396	0	4,395604396	0,032893993	n.s	1,902748414	0	1,902748414	0,000107006	n.s
OR1F12	NaN	n.s	0.201733029055063	n.s	1,098901099	0	1,098901099	4,22E-09	n.s	0,21141649	0	0,21141649	2,24E-14	n.s
RFPL4B	NaN	n.s	0.11868640106721	n.s	7,032967033	0	7,032967033	0,236376804	n.s	4,4397463	0	4,4397463	0,041843083	n.s
FOXB2	NaN	n.s	2.30210183619158e-11	lusc	1,318681319	0	1,318681319	1,51E-07	n.s	12,89640592	0	12,89640592	0,627742091	n.s
FAM47C	NaN	n.s	0.155637464967747	n.s	2,197802198	0	2,197802198	0,00018585	n.s	0,845665962	0	0,845665962	1,42E-10	n.s
FRG2	NaN	n.s	2.97484988639679e-06	n.s	3,956043956	0	3,956043956	0,018624452	n.s	12,68498943	0	12,68498943	0,619423753	n.s
KPRP	NaN	n.s	2.94263426164987e-72	lusc	0,659340659	0	0,659340659	1,56E-14	n.s	53,69978858	0	53,69978858	0,873926651	n.s
LCE6A	NaN	n.s	5.31630049274095e-06	n.s	0	0	0	NA	n.s	4,862579281	0	4,862579281	0,064318205	n.s
H2AFB1	NaN	n.s	0.0367777828890801	n.s	1,538461538	0	1,538461538	1,97E-06	n.s	4,016913319	0	4,016913319	0,026653234	n.s
PPDPFL	NaN	n.s	2.29991031066996e-14	lusc	0,879120879	0	0,879120879	1,83E-11	n.s	14,58773784	0	14,58773784	0,684184996	n.s
FBXO47	NaN	n.s	0.66917873031307	n.s	14,50549451	0	14,50549451	0,722403114	n.s	13,3192389	0	13,3192389	0,643461693	n.s
MS4A13	NaN	n.s	0.015328083627792	n.s	4,175824176	0	4,175824176	0,025035949	n.s	8,245243129	0	8,245243129	0,348966088	n.s
ARGFX	NaN	n.s	0.000396301345077781	n.s	0,879120879	0	0,879120879	1,83E-11	n.s	5,073995772	0	5,073995772	0,077701469	n.s
CT45A1	NaN	n.s	8.18715811590131e-11	lusc	4,395604396	0	4,395604396	0,032893993	n.s	18,18181818	0	18,18181818	0,762727475	n.s
SLX1A	NaN	n.s	0.000234307144521666	n.s	5,054945055	0	5,054945055	0,063729344	n.s	12,05073996	0	12,05073996	0,592467909	n.s
ANKRD30BL	NaN	n.s	0.875433900870807	n.s	6,813186813	0	6,813186813	0,214226	n.s	6,342494715	0	6,342494715	0,178662404	n.s
CLLU1OS	NaN	n.s	1.00817973631777e-05	n.s	12,96703297	0	12,96703297	0,669117069	n.s	24,5243129	0	24,5243129	0,834371761	n.s
UGT2A2	NaN	n.s	2.29306902013306e-11	lusc	0,659340659	0	0,659340659	1,56E-14	n.s	11,41649049	0	11,41649049	0,562202164	n.s
C8orf49	NaN	n.s	2.33850643616941e-09	lusc	3,516483516	0	3,516483516	0,009048815	n.s	15,22198732	0	15,22198732	0,70147482	n.s
CTXN3	NaN	n.s	5.04544845683202e-06	n.s	1,098901099	0	1,098901099	4,22E-09	n.s	7,399577167	0	7,399577167	0,274680866	n.s
POTEM	NaN	n.s	0.00269208995944989	n.s	0,659340659	0	0,659340659	1,56E-14	n.s	3,805496829	0	3,805496829	0,020214634	n.s
AKAIN1	NaN	n.s	0.139806968991308	n.s	2,857142857	0	2,857142857	0,002066819	n.s	1,268498943	0	1,268498943	4,87E-07	n.s
TRIM49C	NaN	n.s	0.483004111927789	n.s	6,813186813	0	6,813186813	0,214226	n.s	8,245243129	0	8,245243129	0,348966088	n.s
FAM25A	NaN	n.s	9.68266078635496e-41	lusc	9,010989011	0	9,010989011	0,427121179	n.s	49,26004228	0	49,26004228	0,888266964	n.s
LIPK	NaN	n.s	3.49463327377033e-11	lusc	39,56043956	0	39,56043956	0,882508988	n.s	61,52219873	0	61,52219873	0,838145753	n.s
FAM25C	NaN	n.s	1.5659239936924e-13	lusc	0,21978022	0	0,21978022	1,56E-14	n.s	12,26215645	0	12,26215645	0,601801056	n.s
DEFB131A	NaN	n.s	0.0110476312914648	n.s	1,758241758	0	1,758241758	1,33E-05	n.s	0	0	0	NA	n.s
NKX2-4	NaN	n.s	0.00041364183588381	n.s	12,08791209	0	12,08791209	0,630489081	n.s	20,93023256	0	20,93023256	0,800574287	n.s
CLDN25	NaN	n.s	0.00147765150012253	n.s	1,318681319	0	1,318681319	1,51E-07	n.s	5,285412262	0	5,285412262	0,092284465	n.s
SMIM23	NaN	n.s	0.000927771112342612	n.s	7,472527473	0	7,472527473	0,280941555	n.s	2,536997886	0	2,536997886	0,00146747	n.s
ZCCHC23	NaN	n.s	0.00253826468274571	n.s	3,296703297	0	3,296703297	0,005883465	n.s	0,422832981	0	0,422832981	2,24E-14	n.s
PRAMEF20	NaN	n.s	1.27740034976635e-05	n.s	0,879120879	0	0,879120879	1,83E-11	n.s	6,553911205	0	6,553911205	0,19762874	n.s
SPATA31C2	NaN	n.s	0.070885709948812	n.s	5,934065934	0	5,934065934	0,130578333	n.s	9,302325581	0	9,302325581	0,432403301	n.s
PABPC1L2B	NaN	n.s	0.0019700428699701	n.s	6,153846154	0	6,153846154	0,150368874	n.s	12,26215645	0	12,26215645	0,601801056	n.s
SPINK8	NaN	n.s	3.91167264030396e-10	lusc	5,054945055	0	5,054945055	0,063729344	n.s	18,60465116	0	18,60465116	0,769490917	n.s
FABP9	NaN	n.s	1.08695974786369e-15	lusc	3,516483516	0	3,516483516	0,009048815	n.s	21,14164905	0	21,14164905	0,802971578	n.s
SBK2	NaN	n.s	0.0315559486658727	n.s	4,615384615	0	4,615384615	0,042148145	n.s	1,902748414	0	1,902748414	0,000107006	n.s
ZAR1L	NaN	n.s	1.19235327157348e-05	n.s	10,98901099	0	10,98901099	0,571396158	n.s	3,382663848	0	3,382663848	0,01036677	n.s
ZNF723	NaN	n.s	0.000673538639711311	n.s	9,89010989	0	9,89010989	0,497775685	n.s	4,016913319	0	4,016913319	0,026653234	n.s
ZNF806	NaN	n.s	0.118126942006768	n.s	2,197802198	0	2,197802198	0,00018585	n.s	4,22832981	0	4,22832981	0,033934328	n.s
PRSS56	NaN	n.s	0.000158093226090713	n.s	11,20879121	0	11,20879121	0,584293685	n.s	20,50739958	0	20,50739958	0,795589319	n.s
SKOR2	NaN	n.s	0.506572283816815	n.s	8,351648352	0	8,351648352	0,367407569	n.s	6,976744186	0	6,976744186	0,236148644	n.s
XAGE1B	NaN	n.s	1.66298016936111e-33	luad	32,74725275	0	32,74725275	0,906238879	n.s	2,536997886	0	2,536997886	0,00146747	n.s
NBPF6	NaN	n.s	0.343642273591214	n.s	9,89010989	0	9,89010989	0,497775685	n.s	12,05073996	0	12,05073996	0,592467909	n.s
TRIM43B	NaN	n.s	0.00163892407602042	n.s	1,978021978	0	1,978021978	5,78E-05	n.s	6,342494715	0	6,342494715	0,178662404	n.s
XAGE1A	NaN	n.s	1.08926593978292e-27	luad	36,26373626	0	36,26373626	0,895557738	n.s	6,765327696	0	6,765327696	0,216832269	n.s
PRB2	NaN	n.s	5.61815070249525e-12	lusc	3,516483516	0	3,516483516	0,009048815	n.s	17,7589852	0	17,7589852	0,755548798	n.s
SPAG11A	NaN	n.s	0.459581500535402	n.s	2,857142857	0	2,857142857	0,002066819	n.s	1,902748414	0	1,902748414	0,000107006	n.s
AQP12B	NaN	n.s	0.182082545581784	n.s	6,153846154	0	6,153846154	0,150368874	n.s	4,016913319	0	4,016913319	0,026653234	n.s
LRTM2	NaN	n.s	0.844447156958932	n.s	1,318681319	0	1,318681319	1,51E-07	n.s	1,691331924	0	1,691331924	2,85E-05	n.s
TMEM78	NaN	n.s	0.989850553031818	n.s	10,32967033	0	10,32967033	0,529123074	n.s	10,57082452	0	10,57082452	0,515994466	n.s
GOLGA6L6	NaN	n.s	1.91823606249149e-06	n.s	1,978021978	0	1,978021978	5,78E-05	n.s	9,513742072	0	9,513742072	0,447596662	n.s
BHLHA9	NaN	n.s	0.0168061533192836	n.s	1,538461538	0	1,538461538	1,97E-06	n.s	4,4397463	0	4,4397463	0,041843083	n.s
RHOXF2B	NaN	n.s	0.943840613440527	n.s	1,538461538	0	1,538461538	1,97E-06	n.s	1,268498943	0	1,268498943	4,87E-07	n.s
TSPY3	NaN	n.s	0.578655433258042	n.s	1,978021978	0	1,978021978	5,78E-05	n.s	2,748414376	0	2,748414376	0,002687623	n.s
KRTAP19-8	NaN	n.s	0.202800869350275	n.s	0,879120879	0	0,879120879	1,83E-11	n.s	2,114164905	0	2,114164905	0,000303668	n.s
SPANXB1	NaN	n.s	0.181521373986773	n.s	9,89010989	0	9,89010989	0,497775685	n.s	12,89640592	0	12,89640592	0,627742091	n.s
NPIPB8	NaN	n.s	0.876861822992995	n.s	1,758241758	0	1,758241758	1,33E-05	n.s	2,114164905	0	2,114164905	0,000303668	n.s
LOC729159	NaN	n.s	1.26583544926923e-08	lusc	2,857142857	0	2,857142857	0,002066819	n.s	13,3192389	0	13,3192389	0,643461693	n.s
GAGE12J	NaN	n.s	0.0531190960564138	n.s	1,978021978	0	1,978021978	5,78E-05	n.s	4,4397463	0	4,4397463	0,041843083	n.s
GAGE12H	NaN	n.s	0.165053890725927	n.s	1,098901099	0	1,098901099	4,22E-09	n.s	2,536997886	0	2,536997886	0,00146747	n.s
GAGE2A	NaN	n.s	1.88102060506971e-12	lusc	6,373626374	0	6,373626374	0,171035397	n.s	23,04439746	0	23,04439746	0,822066711	n.s
CEACAM18	NaN	n.s	0.108980268061135	n.s	3,296703297	0	3,296703297	0,005883465	n.s	1,479915433	0	1,479915433	5,05E-06	n.s
TBC1D3	NaN	n.s	0.769022792249538	n.s	3,516483516	0	3,516483516	0,009048815	n.s	2,959830867	0	2,959830867	0,004544091	n.s
ZNF735	NaN	n.s	0.00264248560159442	n.s	0,879120879	0	0,879120879	1,83E-11	n.s	4,22832981	0	4,22832981	0,033934328	n.s
KRTAP2-3	NaN	n.s	0.430481884924881	n.s	22,1978022	0	22,1978022	0,8503798	n.s	19,87315011	0	19,87315011	0,787598969	n.s
TDRG1	NaN	n.s	4.84758097485054e-08	lusc	7,472527473	0	7,472527473	0,280941555	n.s	20,0845666	0	20,0845666	0,790334282	n.s
KIAA1024L	NaN	n.s	0.823557687032807	n.s	1,098901099	0	1,098901099	4,22E-09	n.s	1,479915433	0	1,479915433	5,05E-06	n.s
KHDC1L	NaN	n.s	1.15659742431096e-08	lusc	21,0989011	0	21,0989011	0,839813628	n.s	38,47780127	0	38,47780127	0,896902051	n.s
C1orf68	NaN	n.s	5.38071961122734e-45	lusc	0,659340659	0	0,659340659	1,56E-14	n.s	37,42071882	0	37,42071882	0,894041135	n.s
TDRD15	NaN	n.s	0.0305728181598115	n.s	3,736263736	0	3,736263736	0,013285131	n.s	7,188160677	0	7,188160677	0,25546501	n.s
CCDC166	NaN	n.s	0.00466075717976012	n.s	9,450549451	0	9,450549451	0,463779977	n.s	15,85623679	0	15,85623679	0,717057257	n.s
PRR32	NaN	n.s	9.80720604996059e-24	luad	24,61538462	0	24,61538462	0,869115799	n.s	2,114164905	0	2,114164905	0,000303668	n.s
ANKRD63	NaN	n.s	7.38009968002657e-12	lusc	4,175824176	0	4,175824176	0,025035949	n.s	18,81606765	0	18,81606765	0,772727163	n.s
SP9	NaN	n.s	5.71926303709174e-66	lusc	16,26373626	0	16,26373626	0,767070301	n.s	72,51585624	0	72,51585624	0,738058972	n.s
GOLGA8F	NaN	n.s	0.00100011708605496	n.s	1,098901099	0	1,098901099	4,22E-09	n.s	5,073995772	0	5,073995772	0,077701469	n.s
FAM25G	NaN	n.s	1.32496666756605e-07	lusc	0	0	0	NA	n.s	6,342494715	0	6,342494715	0,178662404	n.s
KCNJ18	NaN	n.s	0.000252698795694982	n.s	7,692307692	0	7,692307692	0,303063289	n.s	15,6448203	0	15,6448203	0,712039028	n.s
KRTAP20-4	NaN	n.s	0.0224973499513638	n.s	1,098901099	0	1,098901099	4,22E-09	n.s	3,594080338	0	3,594080338	0,014796286	n.s
PATE3	NaN	n.s	0.0806999274971197	n.s	2,197802198	0	2,197802198	0,00018585	n.s	0,634249471	0	0,634249471	3,43E-14	n.s
C5orf52	NaN	n.s	0.155637464967747	n.s	2,197802198	0	2,197802198	0,00018585	n.s	0,845665962	0	0,845665962	1,42E-10	n.s
ERVV-2	NaN	n.s	0.131063343004701	n.s	23,51648352	0	23,51648352	0,861265698	n.s	19,23890063	0	19,23890063	0,778927516	n.s
ZNF729	NaN	n.s	0.0649976702939593	n.s	8,571428571	0	8,571428571	0,387901866	n.s	5,285412262	0	5,285412262	0,092284465	n.s
GLYATL1B	NaN	n.s	0.00112143455897069	n.s	8,351648352	0	8,351648352	0,367407569	n.s	3,171247357	0	3,171247357	0,007090406	n.s
TMEM239	NaN	n.s	0.742791185031219	n.s	2,197802198	0	2,197802198	0,00018585	n.s	2,748414376	0	2,748414376	0,002687623	n.s
FRG2C	NaN	n.s	0.44670765166848	n.s	7,692307692	0	7,692307692	0,303063289	n.s	9,302325581	0	9,302325581	0,432403301	n.s
TSPY10	NaN	n.s	0.00489896240084121	n.s	1,538461538	0	1,538461538	1,97E-06	n.s	5,073995772	0	5,073995772	0,077701469	n.s
DEFB4B	NaN	n.s	0.000614859808216635	n.s	2,857142857	0	2,857142857	0,002066819	n.s	8,245243129	0	8,245243129	0,348966088	n.s
KLRF2	NaN	n.s	0.00988067839752813	n.s	7,032967033	0	7,032967033	0,236376804	n.s	12,26215645	0	12,26215645	0,601801056	n.s
TEX48	NaN	n.s	1.14126561023644e-08	luad	26,81318681	0	26,81318681	0,882212273	n.s	11,83932347	0	11,83932347	0,582767146	n.s
KRTAP16-1	NaN	n.s	1.32763115417115e-05	n.s	1,758241758	0	1,758241758	1,33E-05	n.s	8,245243129	0	8,245243129	0,348966088	n.s
TMEM210	NaN	n.s	5.16810243249298e-10	luad	14,28571429	0	14,28571429	0,715728961	n.s	2,748414376	0	2,748414376	0,002687623	n.s
GFY	NaN	n.s	0.0126845936326612	n.s	25,71428571	0	25,71428571	0,876049929	n.s	33,4038055	0	33,4038055	0,881258719	n.s
C8orf17	NaN	n.s	0.00253826468274571	n.s	3,296703297	0	3,296703297	0,005883465	n.s	0,422832981	0	0,422832981	2,24E-14	n.s
TBC1D3J	NaN	n.s	6.73861821422362e-08	lusc	0,21978022	0	0,21978022	1,56E-14	n.s	7,188160677	0	7,188160677	0,25546501	n.s
CCDC169-SOHLH2	NaN	n.s	0.244194328863301	n.s	11,86813187	0	11,86813187	0,619704692	n.s	9,302325581	0	9,302325581	0,432403301	n.s
SMIM35	NaN	n.s	1.31383943099036e-15	lusc	7,692307692	0	7,692307692	0,303063289	n.s	28,11839323	0	28,11839323	0,857700778	n.s
KRTAP29-1	NaN	n.s	6.47050161241607e-12	lusc	2,637362637	0	2,637362637	0,001049743	n.s	16,06765328	0	16,06765328	0,721909695	n.s
PRORY	NaN	n.s	0.0811598125028188	n.s	3,296703297	0	3,296703297	0,005883465	n.s	5,919661734	0	5,919661734	0,141986149	n.s
FTCD-AS1	NaN	n.s	3.24031732436237e-06	n.s	1,538461538	0	1,538461538	1,97E-06	n.s	8,456659619	0	8,456659619	0,36660228	n.s
TCP11X2	NaN	n.s	0.999999999999998	n.s	0	0	0	NA	n.s	0,21141649	0	0,21141649	2,24E-14	n.s
TBC1D3K	NaN	n.s	0.0523554603733818	n.s	3,076923077	0	3,076923077	0,003614893	n.s	1,057082452	0	1,057082452	1,96E-08	n.s
TBC1D3D	NaN	n.s	0.0967481997135066	n.s	10,98901099	0	10,98901099	0,571396158	n.s	7,610993658	0	7,610993658	0,293708359	n.s
IFNL4	NaN	n.s	0.0129464843385281	n.s	11,20879121	0	11,20879121	0,584293685	n.s	17,12473573	0	17,12473573	0,743923108	n.s
CCDC182	NaN	n.s	0.589155886148457	n.s	0,659340659	0	0,659340659	1,56E-14	n.s	0,21141649	0	0,21141649	2,24E-14	n.s
LY6L	NaN	n.s	0.284714318124561	n.s	2,197802198	0	2,197802198	0,00018585	n.s	3,594080338	0	3,594080338	0,014796286	n.s
CCDC92B	NaN	n.s	0.000134183213736822	n.s	5,274725275	0	5,274725275	0,078285304	n.s	12,68498943	0	12,68498943	0,619423753	n.s
CSAG2	NaN	n.s	1.78336240258248e-23	lusc	18,68131868	0	18,68131868	0,810100082	n.s	50,10570825	0	50,10570825	0,885773608	n.s
CT45A10	NaN	n.s	5.03227077912554e-21	lusc	4,615384615	0	4,615384615	0,042148145	n.s	27,69556025	0	27,69556025	0,855340762	n.s
TLE7	NaN	n.s	0.0834262858627193	n.s	4,615384615	0	4,615384615	0,042148145	n.s	2,325581395	0	2,325581395	0,000721163	n.s
GAGE10	NaN	n.s	0.741015049502095	n.s	1,978021978	0	1,978021978	5,78E-05	n.s	1,479915433	0	1,479915433	5,05E-06	n.s
PNMA6F	NaN	n.s	0.000316523096427263	n.s	6,593406593	0	6,593406593	0,19238467	n.s	1,691331924	0	1,691331924	2,85E-05	n.s
LINC02054	NaN	n.s	0.125568990111663	n.s	4,615384615	0	4,615384615	0,042148145	n.s	2,536997886	0	2,536997886	0,00146747	n.s
LRRC53	NaN	n.s	0.497509143152232	n.s	1,318681319	0	1,318681319	1,51E-07	n.s	2,114164905	0	2,114164905	0,000303668	n.s
BUB1B-PAK6	NaN	n.s	0.000135544451161051	n.s	2,637362637	0	2,637362637	0,001049743	n.s	8,66807611	0	8,66807611	0,383784797	n.s
LOC107986453	NaN	n.s	1.05034822881189e-15	lusc	15,38461538	0	15,38461538	0,746514547	n.s	39,11205074	0	39,11205074	0,898535317	n.s
SMIM28	NaN	n.s	0.540826069814689	n.s	0,659340659	0	0,659340659	1,56E-14	n.s	1,268498943	0	1,268498943	4,87E-07	n.s
SMIM36	NaN	n.s	3.84244538386408e-07	lusc	9,89010989	0	9,89010989	0,497775685	n.s	22,41014799	0	22,41014799	0,816158168	n.s
KLK3	NaN	n.s	1	n.s	0,43956044	0	0,43956044	1,56E-14	n.s	0,634249471	0	0,634249471	3,43E-14	n.s
BRS3	NaN	n.s	0.392309319137586	n.s	2,417582418	0	2,417582418	0,000478719	n.s	3,594080338	0	3,594080338	0,014796286	n.s
BOLL	NaN	n.s	5.50084680811988e-07	lusc	18,02197802	0	18,02197802	0,79997482	n.s	32,55813953	0	32,55813953	0,87809682	n.s
RTBDN	NaN	n.s	0.00928096042236701	n.s	52,08791209	0	52,08791209	0,801452272	n.s	43,34038055	0	43,34038055	0,903292355	n.s
OTOP2	NaN	n.s	4.90210957304832e-49	lusc	5,054945055	0	5,054945055	0,063729344	n.s	48,20295983	0	48,20295983	0,891247128	n.s
C10orf90	NaN	n.s	1.52589177175555e-14	lusc	19,12087912	0	19,12087912	0,81630467	n.s	42,70613108	0	42,70613108	0,904690792	n.s
ZNF648	NaN	n.s	0.0909680663106802	n.s	20,87912088	0	20,87912088	0,837510018	n.s	25,79281184	0	25,79281184	0,843528333	n.s
IZUMO1R	NaN	n.s	0.829621935431805	n.s	3,736263736	0	3,736263736	0,013285131	n.s	4,22832981	0	4,22832981	0,033934328	n.s
GABRG1	NaN	n.s	0.156013603934946	n.s	1,538461538	0	1,538461538	1,97E-06	n.s	3,171247357	0	3,171247357	0,007090406	n.s
GLRA2	NaN	n.s	1.66599180218316e-13	lusc	0,659340659	0	0,659340659	1,56E-14	n.s	13,3192389	0	13,3192389	0,643461693	n.s
CYP4F2	NaN	n.s	4.35390989792404e-29	lusc	7,912087912	0	7,912087912	0,324912763	n.s	39,53488372	0	39,53488372	0,899591647	n.s
TBC1D28	NaN	n.s	1	n.s	0,43956044	0	0,43956044	1,56E-14	n.s	0,634249471	0	0,634249471	3,43E-14	n.s
DPYSL5	NaN	n.s	3.36485574567579e-25	lusc	7,912087912	0	7,912087912	0,324912763	n.s	36,57505285	0	36,57505285	0,891617126	n.s
CCDC177	NaN	n.s	4.8271392065155e-43	lusc	14,72527473	0	14,72527473	0,728805475	n.s	58,56236786	0	58,56236786	0,853720546	n.s
APOF	NaN	n.s	0.000477305330135578	n.s	9,450549451	0	9,450549451	0,463779977	n.s	3,594080338	0	3,594080338	0,014796286	n.s
DAZL	NaN	n.s	0.00125074813144155	n.s	5,934065934	0	5,934065934	0,130578333	n.s	12,26215645	0	12,26215645	0,601801056	n.s
PGA5	NaN	n.s	0.720150560053171	n.s	1,538461538	0	1,538461538	1,97E-06	n.s	1,057082452	0	1,057082452	1,96E-08	n.s
OR7A5	NaN	n.s	1.78675493942989e-60	lusc	4,615384615	0	4,615384615	0,042148145	n.s	54,12262156	0	54,12262156	0,872381596	n.s
CALML5	NaN	n.s	1.59423782061302e-65	lusc	10,98901099	0	10,98901099	0,571396158	n.s	65,96194503	0	65,96194503	0,807914689	n.s
OR2AE1	NaN	n.s	0.0385805894305928	n.s	1,758241758	0	1,758241758	1,33E-05	n.s	0,21141649	0	0,21141649	2,24E-14	n.s
SERPINA11	NaN	n.s	2.49911820063828e-25	lusc	5,054945055	0	5,054945055	0,063729344	n.s	31,92389006	0	31,92389006	0,875595396	n.s
PITX2	NaN	n.s	0.0825118488954553	n.s	75,16483516	0	75,16483516	0,269661898	n.s	80,12684989	0	80,12684989	0,57572069	n.s
FGF16	NaN	n.s	0.0370040351424616	n.s	3,516483516	0	3,516483516	0,009048815	n.s	6,765327696	0	6,765327696	0,216832269	n.s
NCAN	NaN	n.s	1.10307975774641e-06	n.s	12,08791209	0	12,08791209	0,630489081	n.s	24,73572939	0	24,73572939	0,835979562	n.s
HOXA11	NaN	n.s	2.66299084081811e-68	lusc	20,87912088	0	20,87912088	0,837510018	n.s	78,43551797	0	78,43551797	0,623866377	n.s
PPY	NaN	n.s	0.720150560053171	n.s	1,538461538	0	1,538461538	1,97E-06	n.s	1,057082452	0	1,057082452	1,96E-08	n.s
MEIKIN	NaN	n.s	0.0523554603733818	n.s	3,076923077	0	3,076923077	0,003614893	n.s	1,057082452	0	1,057082452	1,96E-08	n.s
TMPRSS11A	NaN	n.s	3.92583983217077e-119	lusc	3,956043956	0	3,956043956	0,018624452	n.s	79,49260042	0	79,49260042	0,594821097	n.s
PPIAL4A	NaN	n.s	0.400497056203159	n.s	3,956043956	0	3,956043956	0,018624452	n.s	2,748414376	0	2,748414376	0,002687623	n.s
NEUROD1	NaN	n.s	3.0446437982791e-08	luad	12,96703297	0	12,96703297	0,669117069	n.s	2,959830867	0	2,959830867	0,004544091	n.s
RBP3	NaN	n.s	4.00860397564748e-10	lusc	4,175824176	0	4,175824176	0,025035949	n.s	17,12473573	0	17,12473573	0,743923108	n.s
DLX6	NaN	n.s	8.71632613615218e-80	lusc	31,86813187	0	31,86813187	0,903425809	n.s	92,17758985	0	92,17758985	0,037801683	n.s
NRSN1	NaN	n.s	0.000191156808547573	n.s	1,978021978	0	1,978021978	5,78E-05	n.s	7,399577167	0	7,399577167	0,274680866	n.s
BHMG1	NaN	n.s	0.765320439656685	n.s	9,010989011	0	9,010989011	0,427121179	n.s	8,245243129	0	8,245243129	0,348966088	n.s
ODF3	NaN	n.s	0.0221538806654992	n.s	1,978021978	0	1,978021978	5,78E-05	n.s	0,21141649	0	0,21141649	2,24E-14	n.s
RHO	NaN	n.s	0.999999999999999	n.s	2,197802198	0	2,197802198	0,00018585	n.s	2,114164905	0	2,114164905	0,000303668	n.s
RNF186	NaN	n.s	1.38264092234728e-57	luad	55,38461538	0	55,38461538	0,766314382	n.s	6,765327696	0	6,765327696	0,216832269	n.s
CSAG1	NaN	n.s	1.14668740063179e-11	lusc	24,17582418	0	24,17582418	0,866094852	n.s	45,66596195	0	45,66596195	0,897844065	n.s
TCP10L2	NaN	n.s	1.31133347087009e-05	n.s	8,791208791	0	8,791208791	0,407819354	n.s	2,114164905	0	2,114164905	0,000303668	n.s
CLRN2	NaN	n.s	0.0110476312914648	n.s	1,758241758	0	1,758241758	1,33E-05	n.s	0	0	0	NA	n.s
CD300LD	NaN	n.s	0.999999999999998	n.s	0,659340659	0	0,659340659	1,56E-14	n.s	0,845665962	0	0,845665962	1,42E-10	n.s
KRT71	NaN	n.s	2.29338052109883e-28	lusc	1,538461538	0	1,538461538	1,97E-06	n.s	27,48414376	0	27,48414376	0,854127333	n.s
COX8C	NaN	n.s	0.000314227034720814	n.s	2,637362637	0	2,637362637	0,001049743	n.s	8,245243129	0	8,245243129	0,348966088	n.s
THEGL	NaN	n.s	0.000298282758317015	n.s	29,89010989	0	29,89010989	0,896272537	n.s	19,45031712	0	19,45031712	0,78189862	n.s
UBE2NL	NaN	n.s	0.297049220063704	n.s	1,538461538	0	1,538461538	1,97E-06	n.s	2,748414376	0	2,748414376	0,002687623	n.s
C17orf98	NaN	n.s	0.039802115553779	n.s	4,175824176	0	4,175824176	0,025035949	n.s	1,691331924	0	1,691331924	2,85E-05	n.s
TRIML2	NaN	n.s	2.57971391773154e-11	lusc	5,494505495	0	5,494505495	0,094369418	n.s	20,50739958	0	20,50739958	0,795589319	n.s
DMBX1	NaN	n.s	0.0382175851327816	n.s	69,45054945	0	69,45054945	0,473011412	n.s	62,79069767	0	62,79069767	0,830470481	n.s
TPH2	NaN	n.s	0.00232478144204247	n.s	8,571428571	0	8,571428571	0,387901866	n.s	3,594080338	0	3,594080338	0,014796286	n.s
TRIM15	NaN	n.s	0.00560621554719868	n.s	48,13186813	0	48,13186813	0,834283564	n.s	38,90063425	0	38,90063425	0,897997523	n.s
BEST2	NaN	n.s	1.1069942291257e-21	lusc	3,516483516	0	3,516483516	0,009048815	n.s	26,21564482	0	26,21564482	0,846336979	n.s
ACOT6	NaN	n.s	0.121204640917764	n.s	2,637362637	0	2,637362637	0,001049743	n.s	1,057082452	0	1,057082452	1,96E-08	n.s
TAS2R13	NaN	n.s	0.928345862419069	n.s	2,417582418	0	2,417582418	0,000478719	n.s	2,114164905	0	2,114164905	0,000303668	n.s
PDE6H	NaN	n.s	1	n.s	0,43956044	0	0,43956044	1,56E-14	n.s	0,634249471	0	0,634249471	3,43E-14	n.s
OPN4	NaN	n.s	0.999999999999998	n.s	3,296703297	0	3,296703297	0,005883465	n.s	3,382663848	0	3,382663848	0,01036677	n.s
OR2T8	NaN	n.s	0.165921125762909	n.s	0,659340659	0	0,659340659	1,56E-14	n.s	1,902748414	0	1,902748414	0,000107006	n.s
DCAF12L1	NaN	n.s	0.810237719980827	n.s	9,67032967	0	9,67032967	0,481112045	n.s	10,35940803	0	10,35940803	0,503300102	n.s
DWORF	NaN	n.s	0.622009846065828	n.s	3,296703297	0	3,296703297	0,005883465	n.s	2,536997886	0	2,536997886	0,00146747	n.s
LENEP	NaN	n.s	0.0752539877365328	n.s	14,06593407	0	14,06593407	0,708768642	n.s	18,60465116	0	18,60465116	0,769490917	n.s
SDR9C7	NaN	n.s	1.58703954982577e-90	lusc	3,296703297	0	3,296703297	0,005883465	n.s	67,01902748	0	67,01902748	0,799099139	n.s
LIPI	NaN	n.s	0.0836667399732159	n.s	8,571428571	0	8,571428571	0,387901866	n.s	12,26215645	0	12,26215645	0,601801056	n.s
GLRA4	NaN	n.s	4.71089538521469e-08	lusc	0,879120879	0	0,879120879	1,83E-11	n.s	8,8794926	0	8,8794926	0,400489398	n.s
SLC22A9	NaN	n.s	0.000322254074935222	n.s	3,736263736	0	3,736263736	0,013285131	n.s	9,936575053	0	9,936575053	0,476451783	n.s
SPERT	NaN	n.s	9.45146632570468e-40	lusc	47,03296703	0	47,03296703	0,841977965	n.s	87,73784355	0	87,73784355	0,232965273	n.s
AKR1D1	NaN	n.s	0.0233739533440267	n.s	10,76923077	0	10,76923077	0,557915295	n.s	16,06765328	0	16,06765328	0,721909695	n.s
PPP1R27	NaN	n.s	1.28989231226195e-37	lusc	8,131868132	0	8,131868132	0,346388763	n.s	45,87737844	0	45,87737844	0,897321909	n.s
SST	NaN	n.s	0.000315328070536686	n.s	12,74725275	0	12,74725275	0,66009407	n.s	5,708245243	0	5,708245243	0,124564593	n.s
C10orf53	NaN	n.s	0.973151003070689	n.s	0,43956044	0	0,43956044	1,56E-14	n.s	0,21141649	0	0,21141649	2,24E-14	n.s
PRDM12	NaN	n.s	0.670647064003341	n.s	32,08791209	0	32,08791209	0,90414837	n.s	33,61522199	0	33,61522199	0,882020111	n.s
FAM9B	NaN	n.s	1.01845492989788e-09	luad	15,16483516	0	15,16483516	0,740848619	n.s	3,382663848	0	3,382663848	0,01036677	n.s
GTF2A1L	NaN	n.s	4.68931695993974e-06	n.s	0,879120879	0	0,879120879	1,83E-11	n.s	6,976744186	0	6,976744186	0,236148644	n.s
SALL1	NaN	n.s	2.00829737515531e-18	lusc	25,71428571	0	25,71428571	0,876049929	n.s	54,12262156	0	54,12262156	0,872381596	n.s
GABRB1	NaN	n.s	0.213497063543851	n.s	9,67032967	0	9,67032967	0,481112045	n.s	7,188160677	0	7,188160677	0,25546501	n.s
SLC32A1	NaN	n.s	0.656342058742734	n.s	1,318681319	0	1,318681319	1,51E-07	n.s	1,902748414	0	1,902748414	0,000107006	n.s
C5orf60	NaN	n.s	0.00746058076429961	n.s	7,032967033	0	7,032967033	0,236376804	n.s	12,47357294	0	12,47357294	0,610781478	n.s
RPS10-NUDT3	NaN	n.s	2.52519302801381e-08	lusc	9,010989011	0	9,010989011	0,427121179	n.s	22,62156448	0	22,62156448	0,818174379	n.s
C8orf87	NaN	n.s	0.0948401513684234	n.s	3,076923077	0	3,076923077	0,003614893	n.s	1,268498943	0	1,268498943	4,87E-07	n.s
DKK4	NaN	n.s	3.50980854848785e-32	lusc	7,032967033	0	7,032967033	0,236376804	n.s	40,38054968	0	40,38054968	0,901630593	n.s
LIN28A	NaN	n.s	0.133717214133971	n.s	7,692307692	0	7,692307692	0,303063289	n.s	5,073995772	0	5,073995772	0,077701469	n.s
OR2B6	NaN	n.s	0.000519192902454293	n.s	36,92307692	0	36,92307692	0,893129878	n.s	48,41437632	0	48,41437632	0,890662727	n.s
OMP	NaN	n.s	6.26920570186575e-10	luad	16,48351648	0	16,48351648	0,771732648	n.s	4,016913319	0	4,016913319	0,026653234	n.s
OR51E2	NaN	n.s	0.00145553828776305	n.s	16,26373626	0	16,26373626	0,767070301	n.s	24,94714588	0	24,94714588	0,837553325	n.s
TAS2R3	NaN	n.s	0.0073764390782969	n.s	2,857142857	0	2,857142857	0,002066819	n.s	0,422832981	0	0,422832981	2,24E-14	n.s
OLIG2	NaN	n.s	0.000868841882489991	n.s	1,538461538	0	1,538461538	1,97E-06	n.s	5,919661734	0	5,919661734	0,141986149	n.s
TMEM114	NaN	n.s	9.97418903457151e-09	lusc	3,516483516	0	3,516483516	0,009048815	n.s	14,58773784	0	14,58773784	0,684184996	n.s
SLC9A4	NaN	n.s	8.47302257237785e-57	lusc	14,50549451	0	14,50549451	0,722403114	n.s	65,96194503	0	65,96194503	0,807914689	n.s
GPR152	NaN	n.s	0.0594356997907937	n.s	1,978021978	0	1,978021978	5,78E-05	n.s	0,422832981	0	0,422832981	2,24E-14	n.s
RGPD1	NaN	n.s	0.207038548524633	n.s	2,857142857	0	2,857142857	0,002066819	n.s	4,651162791	0	4,651162791	0,052230559	n.s
FOXD4L4	NaN	n.s	0.587808229353372	n.s	0,879120879	0	0,879120879	1,83E-11	n.s	1,479915433	0	1,479915433	5,05E-06	n.s
KRT20	NaN	n.s	0.00290926364679693	n.s	16,04395604	0	16,04395604	0,762226836	n.s	24,10147992	0	24,10147992	0,831049645	n.s
NUTM2F	NaN	n.s	5.43212894416326e-20	lusc	1,098901099	0	1,098901099	4,22E-09	n.s	19,87315011	0	19,87315011	0,787598969	n.s
PADI6	NaN	n.s	0.024968898262422	n.s	1,538461538	0	1,538461538	1,97E-06	n.s	4,22832981	0	4,22832981	0,033934328	n.s
RNF151	NaN	n.s	0.622009846065828	n.s	3,296703297	0	3,296703297	0,005883465	n.s	2,536997886	0	2,536997886	0,00146747	n.s
HAO2	NaN	n.s	0.844447156958932	n.s	1,318681319	0	1,318681319	1,51E-07	n.s	1,691331924	0	1,691331924	2,85E-05	n.s
ANP32C	NaN	n.s	0.427685434440523	n.s	1,758241758	0	1,758241758	1,33E-05	n.s	2,748414376	0	2,748414376	0,002687623	n.s
RAD21L1	NaN	n.s	0.046947381535983	n.s	8,571428571	0	8,571428571	0,387901866	n.s	5,073995772	0	5,073995772	0,077701469	n.s
HIST1H2BO	NaN	n.s	2.69895222994467e-10	lusc	34,94505495	0	34,94505495	0,900168859	n.s	55,81395349	0	55,81395349	0,865829632	n.s
IFITM5	NaN	n.s	1.0570195997456e-08	luad	11,42857143	0	11,42857143	0,596629446	n.s	1,902748414	0	1,902748414	0,000107006	n.s
AMY1B	NaN	n.s	0.000450792869184302	n.s	3,516483516	0	3,516483516	0,009048815	n.s	0,21141649	0	0,21141649	2,24E-14	n.s
KCTD4	NaN	n.s	1	n.s	3,076923077	0	3,076923077	0,003614893	n.s	3,171247357	0	3,171247357	0,007090406	n.s
NXPE1	NaN	n.s	0.000496463150895737	n.s	4,835164835	0	4,835164835	0,052352371	n.s	0,845665962	0	0,845665962	1,42E-10	n.s
FABP2	NaN	n.s	0.753665960385083	n.s	2,417582418	0	2,417582418	0,000478719	n.s	1,902748414	0	1,902748414	0,000107006	n.s
KRT6C	NaN	n.s	2.4743168422773e-117	lusc	7,692307692	0	7,692307692	0,303063289	n.s	83,29809725	0	83,29809725	0,458335053	n.s
SPRR2G	NaN	n.s	8.57763137379542e-78	lusc	2,417582418	0	2,417582418	0,000478719	n.s	59,61945032	0	59,61945032	0,848496141	n.s
TEX46	NaN	n.s	5.18414193891443e-23	lusc	2,637362637	0	2,637362637	0,001049743	n.s	25,58139535	0	25,58139535	0,842080652	n.s
SLC17A1	NaN	n.s	9.82481948302146e-08	luad	6,813186813	0	6,813186813	0,214226	n.s	0,21141649	0	0,21141649	2,24E-14	n.s
FGF23	NaN	n.s	0.823557687032807	n.s	1,098901099	0	1,098901099	4,22E-09	n.s	1,479915433	0	1,479915433	5,05E-06	n.s
HIST1H1D	NaN	n.s	8.62669606397218e-08	lusc	32,96703297	0	32,96703297	0,906526294	n.s	50,52854123	0	50,52854123	0,884488331	n.s
VSTM2A	NaN	n.s	0.595591158074494	n.s	3,736263736	0	3,736263736	0,013285131	n.s	4,651162791	0	4,651162791	0,052230559	n.s
PIRT	NaN	n.s	0.104757203937484	n.s	3,956043956	0	3,956043956	0,018624452	n.s	6,553911205	0	6,553911205	0,19762874	n.s
CIDEA	NaN	n.s	2.46577232169083e-12	lusc	5,274725275	0	5,274725275	0,078285304	n.s	21,14164905	0	21,14164905	0,802971578	n.s
DLX1	NaN	n.s	2.80821589762481e-77	lusc	17,36263736	0	17,36263736	0,78873865	n.s	78,64693446	0	78,64693446	0,61832139	n.s
HIGD1C	NaN	n.s	0.999999999999999	n.s	0,879120879	0	0,879120879	1,83E-11	n.s	1,057082452	0	1,057082452	1,96E-08	n.s
TMEM88B	NaN	n.s	8.26232694013721e-05	n.s	32,08791209	0	32,08791209	0,90414837	n.s	20,50739958	0	20,50739958	0,795589319	n.s
KRT3	NaN	n.s	2.55819818324656e-28	lusc	27,91208791	0	27,91208791	0,887719304	n.s	64,27061311	0	64,27061311	0,820601296	n.s
IL19	NaN	n.s	3.12355705826417e-14	lusc	10,54945055	0	10,54945055	0,543830581	n.s	31,0782241	0	31,0782241	0,872071032	n.s
RTP1	NaN	n.s	1.67793147111111e-15	lusc	1,978021978	0	1,978021978	5,78E-05	n.s	17,97040169	0	17,97040169	0,75919219	n.s
LOC100509620	NaN	n.s	1.94015294201107e-15	luad	16,04395604	0	16,04395604	0,762226836	n.s	1,268498943	0	1,268498943	4,87E-07	n.s
SYT14	NaN	n.s	1.21793280964968e-70	lusc	25,71428571	0	25,71428571	0,876049929	n.s	83,93234672	0	83,93234672	0,430093176	n.s
PAPOLB	NaN	n.s	0.466286711633138	n.s	1,318681319	0	1,318681319	1,51E-07	n.s	0,634249471	0	0,634249471	3,43E-14	n.s
DCDC2C	NaN	n.s	0.0699376557774122	n.s	0,659340659	0	0,659340659	1,56E-14	n.s	2,325581395	0	2,325581395	0,000721163	n.s
GSTA5	NaN	n.s	0.000224847325417667	n.s	6,373626374	0	6,373626374	0,171035397	n.s	1,479915433	0	1,479915433	5,05E-06	n.s
HIST1H2BF	NaN	n.s	4.10008730300666e-16	lusc	36,92307692	0	36,92307692	0,893129878	n.s	63,84778013	0	63,84778013	0,823529773	n.s
PNMA6E	NaN	n.s	0.700790653101772	n.s	5,934065934	0	5,934065934	0,130578333	n.s	6,765327696	0	6,765327696	0,216832269	n.s
SHISAL2B	NaN	n.s	0.0577536432785378	n.s	9,89010989	0	9,89010989	0,497775685	n.s	14,16490486	0	14,16490486	0,67158978	n.s
PLGLB2	NaN	n.s	0.948390602557612	n.s	1,318681319	0	1,318681319	1,51E-07	n.s	1,057082452	0	1,057082452	1,96E-08	n.s
APOC3	NaN	n.s	0.786191572669276	n.s	2,857142857	0	2,857142857	0,002066819	n.s	3,382663848	0	3,382663848	0,01036677	n.s
PPAN-P2RY11	NaN	n.s	0.216941813316082	n.s	1,538461538	0	1,538461538	1,97E-06	n.s	2,959830867	0	2,959830867	0,004544091	n.s
OR13J1	NaN	n.s	0.0634399098984444	n.s	3,296703297	0	3,296703297	0,005883465	n.s	1,268498943	0	1,268498943	4,87E-07	n.s
NR0B1	NaN	n.s	2.15940162921465e-07	lusc	23,2967033	0	23,2967033	0,859570659	n.s	39,32346723	0	39,32346723	0,899066651	n.s
MYADML2	NaN	n.s	0.00536150323333965	n.s	23,51648352	0	23,51648352	0,861265698	n.s	31,92389006	0	31,92389006	0,875595396	n.s
FOXI3	NaN	n.s	1.23537880237216e-11	lusc	48,35164835	0	48,35164835	0,83267788	n.s	70,40169133	0	70,40169133	0,765104566	n.s
FNDC7	NaN	n.s	0.191680186221932	n.s	1,318681319	0	1,318681319	1,51E-07	n.s	2,748414376	0	2,748414376	0,002687623	n.s
DSG1	NaN	n.s	3.58376392972073e-92	lusc	4,395604396	0	4,395604396	0,032893993	n.s	69,34460888	0	69,34460888	0,776803323	n.s
MC4R	NaN	n.s	1.50736152601658e-05	n.s	16,26373626	0	16,26373626	0,767070301	n.s	28,32980973	0	28,32980973	0,858848578	n.s
GBX2	NaN	n.s	1.56958361529671e-30	lusc	15,16483516	0	15,16483516	0,740848619	n.s	50,95137421	0	50,95137421	0,883176186	n.s
SPDYE4	NaN	n.s	0.233871252997515	n.s	0,659340659	0	0,659340659	1,56E-14	n.s	0	0	0	NA	n.s
CRHR1	NaN	n.s	1.16866244700715e-05	n.s	18,24175824	0	18,24175824	0,803465788	n.s	30,86680761	0	30,86680761	0,871153916	n.s
ZNF177	NaN	n.s	0.240832720708375	n.s	1,758241758	0	1,758241758	1,33E-05	n.s	3,171247357	0	3,171247357	0,007090406	n.s
TMEM189-UBE2V1	NaN	n.s	1.52187850888991e-05	n.s	0	0	0	NA	n.s	4,4397463	0	4,4397463	0,041843083	n.s
ONECUT3	NaN	n.s	6.82784612476893e-27	lusc	14,94505495	0	14,94505495	0,734949671	n.s	47,99154334	0	47,99154334	0,891825894	n.s
TAS2R30	NaN	n.s	0.938135022085899	n.s	3,076923077	0	3,076923077	0,003614893	n.s	3,382663848	0	3,382663848	0,01036677	n.s
STXBP5L	NaN	n.s	7.54532258526168e-27	lusc	11,42857143	0	11,42857143	0,596629446	n.s	43,12896406	0	43,12896406	0,903762431	n.s
RPL10L	NaN	n.s	0.156658920197866	n.s	8,791208791	0	8,791208791	0,407819354	n.s	11,83932347	0	11,83932347	0,582767146	n.s
SMLR1	NaN	n.s	0.425266138268028	n.s	2,417582418	0	2,417582418	0,000478719	n.s	1,479915433	0	1,479915433	5,05E-06	n.s
MINDY4B	NaN	n.s	3.99812942121455e-14	lusc	5,274725275	0	5,274725275	0,078285304	n.s	22,83298097	0	22,83298097	0,820143366	n.s
LHX2	NaN	n.s	1.90472608033556e-45	lusc	38,02197802	0	38,02197802	0,888888804	n.s	83,50951374	0	83,50951374	0,449101537	n.s
TAF1L	NaN	n.s	2.32322859266178e-19	luad	22,85714286	0	22,85714286	0,856042859	n.s	2,959830867	0	2,959830867	0,004544091	n.s
SPRR2E	NaN	n.s	1.03059893156726e-83	lusc	2,197802198	0	2,197802198	0,00018585	n.s	62,1564482	0	62,1564482	0,834392226	n.s
GPR52	NaN	n.s	0.95908508328814	n.s	3,736263736	0	3,736263736	0,013285131	n.s	4,016913319	0	4,016913319	0,026653234	n.s
SORCS3	NaN	n.s	3.0070700240979e-09	lusc	9,010989011	0	9,010989011	0,427121179	n.s	23,67864693	0	23,67864693	0,827577715	n.s
OR51B4	NaN	n.s	3.36964727348422e-06	n.s	4,395604396	0	4,395604396	0,032893993	n.s	13,3192389	0	13,3192389	0,643461693	n.s
RFX6	NaN	n.s	5.42778146803313e-07	luad	15,82417582	0	15,82417582	0,757193007	n.s	5,496828753	0	5,496828753	0,107949818	n.s
FAM170A	NaN	n.s	0.999999999999998	n.s	0,21978022	0	0,21978022	1,56E-14	n.s	0,422832981	0	0,422832981	2,24E-14	n.s
HIST1H4C	NaN	n.s	0.0143895118561051	n.s	11,64835165	0	11,64835165	0,608425629	n.s	17,54756871	0	17,54756871	0,751792727	n.s
TAS2R50	NaN	n.s	0.121204640917764	n.s	2,637362637	0	2,637362637	0,001049743	n.s	1,057082452	0	1,057082452	1,96E-08	n.s
POM121L2	NaN	n.s	0.605576767396151	n.s	19,56043956	0	19,56043956	0,822116456	n.s	21,14164905	0	21,14164905	0,802971578	n.s
GNG13	NaN	n.s	0.970202534392367	n.s	13,40659341	0	13,40659341	0,686015395	n.s	13,10782241	0	13,10782241	0,635750288	n.s
PMCH	NaN	n.s	0.665709108054653	n.s	7,472527473	0	7,472527473	0,280941555	n.s	8,456659619	0	8,456659619	0,36660228	n.s
NDUFA7	NaN	n.s	0.00435038365789248	n.s	0,659340659	0	0,659340659	1,56E-14	n.s	3,594080338	0	3,594080338	0,014796286	n.s
PAGE4	NaN	n.s	0.00355238557470712	n.s	3,956043956	0	3,956043956	0,018624452	n.s	8,8794926	0	8,8794926	0,400489398	n.s
VSX1	NaN	n.s	3.49887492073887e-28	luad	47,69230769	0	47,69230769	0,837426924	n.s	14,16490486	0	14,16490486	0,67158978	n.s
POU4F1	NaN	n.s	1.47405351108834e-10	lusc	43,73626374	0	43,73626374	0,862106673	n.s	64,90486258	0	64,90486258	0,816033085	n.s
SLC34A1	NaN	n.s	9.29280976123928e-13	lusc	8,791208791	0	8,791208791	0,407819354	n.s	27,06131078	0	27,06131078	0,851630431	n.s
STMN4	NaN	n.s	4.33279515819275e-06	n.s	2,417582418	0	2,417582418	0,000478719	n.s	9,936575053	0	9,936575053	0,476451783	n.s
KIF4B	NaN	n.s	0.114043827059978	n.s	5,054945055	0	5,054945055	0,063729344	n.s	7,822410148	0	7,822410148	0,312472118	n.s
A1CF	NaN	n.s	1.02891860876974e-07	luad	14,94505495	0	14,94505495	0,734949671	n.s	4,4397463	0	4,4397463	0,041843083	n.s
DEFB4A	NaN	n.s	8.60358506460849e-07	n.s	6,593406593	0	6,593406593	0,19238467	n.s	17,33615222	0	17,33615222	0,747919178	n.s
ATCAY	NaN	n.s	0.128448944080717	n.s	4,615384615	0	4,615384615	0,042148145	n.s	7,188160677	0	7,188160677	0,25546501	n.s
RNASE10	NaN	n.s	4.95100624622253e-22	lusc	16,92307692	0	16,92307692	0,780548478	n.s	46,7230444	0	46,7230444	0,895184894	n.s
TUBA3E	NaN	n.s	2.83045045809965e-05	n.s	4,835164835	0	4,835164835	0,052352371	n.s	12,89640592	0	12,89640592	0,627742091	n.s
OR3A2	NaN	n.s	0.92143807585718	n.s	2,637362637	0	2,637362637	0,001049743	n.s	2,959830867	0	2,959830867	0,004544091	n.s
KCNA7	NaN	n.s	6.01904784853439e-19	lusc	18,68131868	0	18,68131868	0,810100082	n.s	46,30021142	0	46,30021142	0,896263225	n.s
HEPACAM	NaN	n.s	2.49388712444738e-06	n.s	0,659340659	0	0,659340659	1,56E-14	n.s	6,765327696	0	6,765327696	0,216832269	n.s
GCGR	NaN	n.s	1.50502117099021e-26	lusc	18,46153846	0	18,46153846	0,806839115	n.s	52,21987315	0	52,21987315	0,879069392	n.s
TBX20	NaN	n.s	7.0073610222753e-09	lusc	15,16483516	0	15,16483516	0,740848619	n.s	31,50105708	0	31,50105708	0,873861331	n.s
MS4A18	NaN	n.s	0.000292034358899438	n.s	4,175824176	0	4,175824176	0,025035949	n.s	0,422832981	0	0,422832981	2,24E-14	n.s
IL36RN	NaN	n.s	1.45698548524378e-23	lusc	47,47252747	0	47,47252747	0,838965411	n.s	79,28118393	0	79,28118393	0,600900545	n.s
IL36G	NaN	n.s	4.91650804227502e-51	lusc	27,25274725	0	27,25274725	0,884487981	n.s	76,74418605	0	76,74418605	0,663950975	n.s
FADS6	NaN	n.s	7.59700157570211e-30	lusc	34,72527473	0	34,72527473	0,900907235	n.s	72,09302326	0	72,09302326	0,743902492	n.s
PRR9	NaN	n.s	3.51730393764548e-16	lusc	0,659340659	0	0,659340659	1,56E-14	n.s	15,6448203	0	15,6448203	0,712039028	n.s
SPDYE2B	NaN	n.s	0.707718931619701	n.s	3,736263736	0	3,736263736	0,013285131	n.s	4,4397463	0	4,4397463	0,041843083	n.s
SYNGR4	NaN	n.s	3.74467728632831e-06	n.s	50,76923077	0	50,76923077	0,813384402	n.s	35,5179704	0	35,5179704	0,888401111	n.s
FSTL5	NaN	n.s	1.69291953188529e-07	lusc	16,92307692	0	16,92307692	0,780548478	n.s	31,92389006	0	31,92389006	0,875595396	n.s
HBZ	NaN	n.s	NaN	n.s	0	0	0	NA	n.s	0	0	0	NA	n.s
FOXH1	NaN	n.s	8.39454342257102e-08	lusc	35,16483516	0	35,16483516	0,899422085	n.s	52,85412262	0	52,85412262	0,8769141	n.s
OR5P3	NaN	n.s	0.973151003070689	n.s	0,43956044	0	0,43956044	1,56E-14	n.s	0,21141649	0	0,21141649	2,24E-14	n.s
KCNJ9	NaN	n.s	3.34952675946355e-05	n.s	3,516483516	0	3,516483516	0,009048815	n.s	10,78224101	0	10,78224101	0,528218081	n.s
FLG2	NaN	n.s	1.63826771785645e-17	lusc	1,758241758	0	1,758241758	1,33E-05	n.s	19,23890063	0	19,23890063	0,778927516	n.s
TEX35	NaN	n.s	5.80028393205609e-07	n.s	7,472527473	0	7,472527473	0,280941555	n.s	18,81606765	0	18,81606765	0,772727163	n.s
KDM4E	NaN	n.s	0.107244287458106	n.s	4,835164835	0	4,835164835	0,052352371	n.s	7,610993658	0	7,610993658	0,293708359	n.s
FABP1	NaN	n.s	0.173406941689622	n.s	3,296703297	0	3,296703297	0,005883465	n.s	1,691331924	0	1,691331924	2,85E-05	n.s
DLL3	NaN	n.s	1.7862220071483e-06	n.s	57,58241758	0	57,58241758	0,737781625	n.s	72,72727273	0	72,72727273	0,735047699	n.s
TM4SF20	NaN	n.s	0.000167043890882448	n.s	10,32967033	0	10,32967033	0,529123074	n.s	3,805496829	0	3,805496829	0,020214634	n.s
GAL3ST3	NaN	n.s	1.78362928626411e-05	n.s	4,395604396	0	4,395604396	0,032893993	n.s	12,47357294	0	12,47357294	0,610781478	n.s
MOG	NaN	n.s	0.497080368679462	n.s	2,417582418	0	2,417582418	0,000478719	n.s	3,382663848	0	3,382663848	0,01036677	n.s
DPPA3	NaN	n.s	0.550860041673139	n.s	1,978021978	0	1,978021978	5,78E-05	n.s	1,268498943	0	1,268498943	4,87E-07	n.s
SHISA8	NaN	n.s	1.22085120711805e-16	lusc	2,857142857	0	2,857142857	0,002066819	n.s	20,71881607	0	20,71881607	0,798114318	n.s
SRY	NaN	n.s	1.65382480042238e-12	lusc	0	0	0	NA	n.s	10,78224101	0	10,78224101	0,528218081	n.s
HIST1H2AM	NaN	n.s	0.10134165281636	n.s	54,50549451	0	54,50549451	0,776506859	n.s	60,0422833	0	60,0422833	0,846306167	n.s
COX6A2	NaN	n.s	0.197835827941868	n.s	8,791208791	0	8,791208791	0,407819354	n.s	6,342494715	0	6,342494715	0,178662404	n.s
KLK2	NaN	n.s	2.65911825030908e-05	n.s	2,417582418	0	2,417582418	0,000478719	n.s	9,090909091	0	9,090909091	0,416699121	n.s
PRSS1	NaN	n.s	0.00590474087186103	n.s	16,04395604	0	16,04395604	0,762226836	n.s	23,46723044	0	23,46723044	0,825782464	n.s
IFNL1	NaN	n.s	0.707209305567694	n.s	11,86813187	0	11,86813187	0,619704692	n.s	12,89640592	0	12,89640592	0,627742091	n.s
SLC35F4	NaN	n.s	0.999999999999998	n.s	9,010989011	0	9,010989011	0,427121179	n.s	9,090909091	0	9,090909091	0,416699121	n.s
ARMS2	NaN	n.s	0.108328378171634	n.s	0,659340659	0	0,659340659	1,56E-14	n.s	2,114164905	0	2,114164905	0,000303668	n.s
NKX6-2	NaN	n.s	0.0523554603733818	n.s	3,076923077	0	3,076923077	0,003614893	n.s	1,057082452	0	1,057082452	1,96E-08	n.s
OR10A3	NaN	n.s	0.0108377313339474	n.s	0,21978022	0	0,21978022	1,56E-14	n.s	2,325581395	0	2,325581395	0,000721163	n.s
LLCFC1	NaN	n.s	1.52187850888991e-05	n.s	0	0	0	NA	n.s	4,4397463	0	4,4397463	0,041843083	n.s
SERPINA2	NaN	n.s	NaN	n.s	0	0	0	NA	n.s	0	0	0	NA	n.s
UBE2Q2L	NaN	n.s	0.0909701247584315	n.s	1,758241758	0	1,758241758	1,33E-05	n.s	3,805496829	0	3,805496829	0,020214634	n.s
GPR26	NaN	n.s	0.000614859808216635	n.s	2,857142857	0	2,857142857	0,002066819	n.s	8,245243129	0	8,245243129	0,348966088	n.s
CCL1	NaN	n.s	0.116722349210921	n.s	8,571428571	0	8,571428571	0,387901866	n.s	5,708245243	0	5,708245243	0,124564593	n.s
CA7	NaN	n.s	0.0576982101009341	n.s	20,65934066	0	20,65934066	0,83513673	n.s	15,6448203	0	15,6448203	0,712039028	n.s
FEV	NaN	n.s	0.30011430003451	n.s	3,956043956	0	3,956043956	0,018624452	n.s	2,536997886	0	2,536997886	0,00146747	n.s
CDK5R2	NaN	n.s	0.679232921665975	n.s	33,62637363	0	33,62637363	0,9044774	n.s	32,13530655	0	32,13530655	0,876442176	n.s
RBPJL	NaN	n.s	0.0183694868346754	n.s	7,252747253	0	7,252747253	0,258666905	n.s	12,05073996	0	12,05073996	0,592467909	n.s
HIST1H3A	NaN	n.s	2.07762369603996e-05	n.s	8,131868132	0	8,131868132	0,346388763	n.s	17,7589852	0	17,7589852	0,755548798	n.s
RGPD4	NaN	n.s	0.0915384271780887	n.s	0,879120879	0	0,879120879	1,83E-11	n.s	2,536997886	0	2,536997886	0,00146747	n.s
MYL2	NaN	n.s	0.00705080677829738	n.s	2,197802198	0	2,197802198	0,00018585	n.s	5,919661734	0	5,919661734	0,141986149	n.s
KISS1R	NaN	n.s	0.000249159465643439	n.s	71,86813187	0	71,86813187	0,390870589	n.s	60,25369979	0	60,25369979	0,84518854	n.s
BEST3	NaN	n.s	0.000903984726514479	n.s	11,86813187	0	11,86813187	0,619704692	n.s	20,0845666	0	20,0845666	0,790334282	n.s
MYH8	NaN	n.s	0.275202818198881	n.s	5,054945055	0	5,054945055	0,063729344	n.s	6,976744186	0	6,976744186	0,236148644	n.s
THEG	NaN	n.s	6.45930091830927e-09	lusc	29,01098901	0	29,01098901	0,892665914	n.s	47,78012685	0	47,78012685	0,892399112	n.s
TRIML1	NaN	n.s	4.58729309267198e-12	lusc	1,318681319	0	1,318681319	1,51E-07	n.s	13,53065539	0	13,53065539	0,650889188	n.s
TMEM249	NaN	n.s	0.000181629003001364	n.s	33,62637363	0	33,62637363	0,9044774	n.s	45,87737844	0	45,87737844	0,897321909	n.s
TMEM89	NaN	n.s	0.0769319370427186	n.s	6,593406593	0	6,593406593	0,19238467	n.s	3,805496829	0	3,805496829	0,020214634	n.s
NR5A1	NaN	n.s	7.01690517693845e-06	n.s	13,62637363	0	13,62637363	0,693928181	n.s	25,58139535	0	25,58139535	0,842080652	n.s
POTEG	NaN	n.s	9.7472018205622e-06	n.s	0,43956044	0	0,43956044	1,56E-14	n.s	5,708245243	0	5,708245243	0,124564593	n.s
CCDC198	NaN	n.s	6.20872076986452e-49	luad	40,87912088	0	40,87912088	0,876588364	n.s	1,479915433	0	1,479915433	5,05E-06	n.s
HOXC10	NaN	n.s	3.72004139670421e-13	lusc	42,41758242	0	42,41758242	0,86909251	n.s	66,38477801	0	66,38477801	0,804476715	n.s
C3orf79	NaN	n.s	0.000209601686611134	n.s	0,43956044	0	0,43956044	1,56E-14	n.s	4,4397463	0	4,4397463	0,041843083	n.s
CA6	NaN	n.s	0.032123329121068	n.s	16,04395604	0	16,04395604	0,762226836	n.s	21,77589852	0	21,77589852	0,809809344	n.s
RIPPLY2	NaN	n.s	2.59681758697566e-29	lusc	9,450549451	0	9,450549451	0,463779977	n.s	42,07188161	0	42,07188161	0,905437842	n.s
CD200R1L	NaN	n.s	1.08719477673208e-15	lusc	2,417582418	0	2,417582418	0,000478719	n.s	19,02748414	0	19,02748414	0,775871502	n.s
MEPE	NaN	n.s	0.000359665122656277	n.s	10,54945055	0	10,54945055	0,543830581	n.s	4,22832981	0	4,22832981	0,033934328	n.s
PADI3	NaN	n.s	3.77599603586516e-58	lusc	10,32967033	0	10,32967033	0,529123074	n.s	61,31078224	0	61,31078224	0,839361348	n.s
SMIM18	NaN	n.s	0.202521588381859	n.s	3,736263736	0	3,736263736	0,013285131	n.s	2,114164905	0	2,114164905	0,000303668	n.s
CPXCR1	NaN	n.s	0.190559012507274	n.s	4,835164835	0	4,835164835	0,052352371	n.s	2,959830867	0	2,959830867	0,004544091	n.s
MRGPRX2	NaN	n.s	0.00701226259926392	n.s	0,43956044	0	0,43956044	1,56E-14	n.s	2,959830867	0	2,959830867	0,004544091	n.s
HSPE1-MOB4	NaN	n.s	0.000124401184551519	n.s	6,593406593	0	6,593406593	0,19238467	n.s	14,58773784	0	14,58773784	0,684184996	n.s
CAMKV	NaN	n.s	9.07922897708598e-14	lusc	8,131868132	0	8,131868132	0,346388763	n.s	27,06131078	0	27,06131078	0,851630431	n.s
FNDC9	NaN	n.s	0.00285182409804029	n.s	4,835164835	0	4,835164835	0,052352371	n.s	1,268498943	0	1,268498943	4,87E-07	n.s
ANKRD33	NaN	n.s	0.301504713081687	n.s	11,86813187	0	11,86813187	0,619704692	n.s	14,37632135	0	14,37632135	0,67800077	n.s
HIST1H4D	NaN	n.s	5.2622511618485e-10	lusc	15,6043956	0	15,6043956	0,751959027	n.s	33,4038055	0	33,4038055	0,881258719	n.s
GABRR1	NaN	n.s	2.22636681103737e-85	lusc	16,26373626	0	16,26373626	0,767070301	n.s	80,76109937	0	80,76109937	0,555260939	n.s
NXPE2	NaN	n.s	0.000359665122656277	n.s	10,54945055	0	10,54945055	0,543830581	n.s	4,22832981	0	4,22832981	0,033934328	n.s
ZG16	NaN	n.s	9.0753633459346e-11	luad	16,92307692	0	16,92307692	0,780548478	n.s	3,805496829	0	3,805496829	0,020214634	n.s
SVOP	NaN	n.s	0.000372608802908099	n.s	6,153846154	0	6,153846154	0,150368874	n.s	13,3192389	0	13,3192389	0,643461693	n.s
SP7	NaN	n.s	0.135510273478307	n.s	3,956043956	0	3,956043956	0,018624452	n.s	6,342494715	0	6,342494715	0,178662404	n.s
IFNE	NaN	n.s	1.17348986479655e-06	n.s	21,0989011	0	21,0989011	0,839813628	n.s	35,72938689	0	35,72938689	0,889061784	n.s
POU3F2	NaN	n.s	0.0698451610482375	n.s	40	0	40	0,880584105	n.s	34,03805497	0	34,03805497	0,883509817	n.s
ST8SIA3	NaN	n.s	0.263912082079323	n.s	2,197802198	0	2,197802198	0,00018585	n.s	1,057082452	0	1,057082452	1,96E-08	n.s
RAB40AL	NaN	n.s	4.23806799253525e-05	n.s	8,131868132	0	8,131868132	0,346388763	n.s	17,33615222	0	17,33615222	0,747919178	n.s
GYPA	NaN	n.s	0.973151003070689	n.s	0,43956044	0	0,43956044	1,56E-14	n.s	0,21141649	0	0,21141649	2,24E-14	n.s
COL20A1	NaN	n.s	0.00160477500547305	n.s	10,32967033	0	10,32967033	0,529123074	n.s	17,7589852	0	17,7589852	0,755548798	n.s
VSX2	NaN	n.s	0.165921125762909	n.s	0,659340659	0	0,659340659	1,56E-14	n.s	1,902748414	0	1,902748414	0,000107006	n.s
FCRL4	NaN	n.s	0.598529572467651	n.s	10,32967033	0	10,32967033	0,529123074	n.s	9,090909091	0	9,090909091	0,416699121	n.s
STARD6	NaN	n.s	7.66042959051283e-14	lusc	5,054945055	0	5,054945055	0,063729344	n.s	22,1987315	0	22,1987315	0,814093086	n.s
EMX2	NaN	n.s	2.25482462247839e-17	lusc	3,076923077	0	3,076923077	0,003614893	n.s	21,77589852	0	21,77589852	0,809809344	n.s
PLET1	NaN	n.s	0.155637464967747	n.s	2,197802198	0	2,197802198	0,00018585	n.s	0,845665962	0	0,845665962	1,42E-10	n.s
TEX101	NaN	n.s	3.87169323623205e-05	n.s	3,296703297	0	3,296703297	0,005883465	n.s	10,35940803	0	10,35940803	0,503300102	n.s
SLC25A2	NaN	n.s	0.268906248272604	n.s	5,054945055	0	5,054945055	0,063729344	n.s	3,382663848	0	3,382663848	0,01036677	n.s
C7orf71	NaN	n.s	0.764713004071307	n.s	3,076923077	0	3,076923077	0,003614893	n.s	2,536997886	0	2,536997886	0,00146747	n.s
SPRR2F	NaN	n.s	1.8398658936033e-30	lusc	6,373626374	0	6,373626374	0,171035397	n.s	38,05496829	0	38,05496829	0,895779191	n.s
SLC22A25	NaN	n.s	0.00163892407602042	n.s	1,978021978	0	1,978021978	5,78E-05	n.s	6,342494715	0	6,342494715	0,178662404	n.s
OR2A1	NaN	n.s	0.496164160340585	n.s	0	0	0	NA	n.s	0,422832981	0	0,422832981	2,24E-14	n.s
SLC1A6	NaN	n.s	8.12880221775123e-57	lusc	8,571428571	0	8,571428571	0,387901866	n.s	58,13953488	0	58,13953488	0,855715856	n.s
NXPH2	NaN	n.s	2.39331260001404e-05	n.s	2,637362637	0	2,637362637	0,001049743	n.s	9,513742072	0	9,513742072	0,447596662	n.s
MS4A10	NaN	n.s	0.0177065231631077	n.s	3,956043956	0	3,956043956	0,018624452	n.s	1,268498943	0	1,268498943	4,87E-07	n.s
ITIH6	NaN	n.s	1.0879826067289e-19	lusc	26,81318681	0	26,81318681	0,882212273	n.s	56,44820296	0	56,44820296	0,863206851	n.s
ANTXRL	NaN	n.s	0.000240191700670412	n.s	12,30769231	0	12,30769231	0,640801001	n.s	5,285412262	0	5,285412262	0,092284465	n.s
SLC15A5	NaN	n.s	7.7397977712574e-12	luad	14,72527473	0	14,72527473	0,728805475	n.s	2,114164905	0	2,114164905	0,000303668	n.s
OR56B4	NaN	n.s	3.72621486139132e-28	lusc	3,516483516	0	3,516483516	0,009048815	n.s	31,28964059	0	31,28964059	0,872973384	n.s
TMCO5A	NaN	n.s	0.999999999999999	n.s	2,197802198	0	2,197802198	0,00018585	n.s	2,114164905	0	2,114164905	0,000303668	n.s
OR6N1	NaN	n.s	0.999999999999998	n.s	0	0	0	NA	n.s	0,21141649	0	0,21141649	2,24E-14	n.s
SLC25A52	NaN	n.s	0.0749326172883401	n.s	1,978021978	0	1,978021978	5,78E-05	n.s	4,22832981	0	4,22832981	0,033934328	n.s
BMP15	NaN	n.s	0.973151003070689	n.s	0,43956044	0	0,43956044	1,56E-14	n.s	0,21141649	0	0,21141649	2,24E-14	n.s
UTS2R	NaN	n.s	0.169647617030917	n.s	7,472527473	0	7,472527473	0,280941555	n.s	5,073995772	0	5,073995772	0,077701469	n.s
ZIC1	NaN	n.s	1.62907565496561e-15	lusc	12,52747253	0	12,52747253	0,650662248	n.s	35,09513742	0	35,09513742	0,887052233	n.s
DNAJC5G	NaN	n.s	0.67790606277732	n.s	9,450549451	0	9,450549451	0,463779977	n.s	8,456659619	0	8,456659619	0,36660228	n.s
C12orf80	NaN	n.s	0.000386009137327433	n.s	18,24175824	0	18,24175824	0,803465788	n.s	9,936575053	0	9,936575053	0,476451783	n.s
CTAGE1	NaN	n.s	0.011436398336024	n.s	3,076923077	0	3,076923077	0,003614893	n.s	0,634249471	0	0,634249471	3,43E-14	n.s
CCDC144NL	NaN	n.s	3.87769267628995e-06	n.s	10,54945055	0	10,54945055	0,543830581	n.s	21,98731501	0	21,98731501	0,811977411	n.s
PITX3	NaN	n.s	9.32160540493554e-19	lusc	7,252747253	0	7,252747253	0,258666905	n.s	30,23255814	0	30,23255814	0,868310212	n.s
PRSS37	NaN	n.s	0.912515338117954	n.s	3,516483516	0	3,516483516	0,009048815	n.s	3,171247357	0	3,171247357	0,007090406	n.s
LYPD8	NaN	n.s	1.14466713905113e-08	lusc	29,89010989	0	29,89010989	0,896272537	n.s	48,41437632	0	48,41437632	0,890662727	n.s
VWC2L	NaN	n.s	0.011436398336024	n.s	3,076923077	0	3,076923077	0,003614893	n.s	0,634249471	0	0,634249471	3,43E-14	n.s
DCAF12L2	NaN	n.s	7.03123742164624e-09	lusc	33,18681319	0	33,18681319	0,905850837	n.s	52,21987315	0	52,21987315	0,879069392	n.s
AGXT	NaN	n.s	0.669789965001624	n.s	6,373626374	0	6,373626374	0,171035397	n.s	5,496828753	0	5,496828753	0,107949818	n.s
ZIM2	NaN	n.s	0.771804881816057	n.s	3,956043956	0	3,956043956	0,018624452	n.s	3,382663848	0	3,382663848	0,01036677	n.s
TAC3	NaN	n.s	0.14710275777394	n.s	10,98901099	0	10,98901099	0,571396158	n.s	14,37632135	0	14,37632135	0,67800077	n.s
ANKS4B	NaN	n.s	1.26055184760952e-29	luad	33,62637363	0	33,62637363	0,9044774	n.s	4,4397463	0	4,4397463	0,041843083	n.s
LOC388813	NaN	n.s	1.55643655170581e-10	luad	27,47252747	0	27,47252747	0,885588632	n.s	10,78224101	0	10,78224101	0,528218081	n.s
KRT32	NaN	n.s	1.16366158657726e-22	lusc	19,56043956	0	19,56043956	0,822116456	n.s	50,52854123	0	50,52854123	0,884488331	n.s
MUC2	NaN	n.s	0.0170671096633148	n.s	17,14285714	0	17,14285714	0,784718028	n.s	23,67864693	0	23,67864693	0,827577715	n.s
LMOD2	NaN	n.s	0.999999999999998	n.s	1,098901099	0	1,098901099	4,22E-09	n.s	1,268498943	0	1,268498943	4,87E-07	n.s
SLC38A8	NaN	n.s	0.00134222550417389	n.s	13,84615385	0	13,84615385	0,701507023	n.s	7,188160677	0	7,188160677	0,25546501	n.s
FAM19A3	NaN	n.s	0.000407751450506416	n.s	2,197802198	0	2,197802198	0,00018585	n.s	7,399577167	0	7,399577167	0,274680866	n.s
HJV	NaN	n.s	0.000301400275236533	n.s	7,692307692	0	7,692307692	0,303063289	n.s	2,325581395	0	2,325581395	0,000721163	n.s
NPIPB9	NaN	n.s	0.313967853520698	n.s	6,373626374	0	6,373626374	0,171035397	n.s	4,651162791	0	4,651162791	0,052230559	n.s
MOGAT2	NaN	n.s	0.00965780712245883	n.s	10,10989011	0	10,10989011	0,513776038	n.s	16,06765328	0	16,06765328	0,721909695	n.s
PHGR1	NaN	n.s	2.46637485375931e-11	luad	13,40659341	0	13,40659341	0,686015395	n.s	1,691331924	0	1,691331924	2,85E-05	n.s
INSL6	NaN	n.s	0.0906159784165154	n.s	5,934065934	0	5,934065934	0,130578333	n.s	3,382663848	0	3,382663848	0,01036677	n.s
NETO1	NaN	n.s	3.84367431813759e-11	lusc	41,53846154	0	41,53846154	0,873457361	n.s	63,42494715	0	63,42494715	0,826369386	n.s
FFAR1	NaN	n.s	0.202800869350275	n.s	0,879120879	0	0,879120879	1,83E-11	n.s	2,114164905	0	2,114164905	0,000303668	n.s
SLC22A11	NaN	n.s	0.000530926782650574	n.s	14,50549451	0	14,50549451	0,722403114	n.s	23,67864693	0	23,67864693	0,827577715	n.s
UBE2U	NaN	n.s	0.674810887713889	n.s	12,30769231	0	12,30769231	0,640801001	n.s	11,205074	0	11,205074	0,551307429	n.s
ATOH7	NaN	n.s	2.90067094905258e-13	lusc	23,95604396	0	23,95604396	0,864526262	n.s	47,14587738	0	47,14587738	0,894086316	n.s
GOLGA6L3	NaN	n.s	0.717369520659788	n.s	0,43956044	0	0,43956044	1,56E-14	n.s	0,845665962	0	0,845665962	1,42E-10	n.s
FIGLA	NaN	n.s	0.643872600473618	n.s	0,21978022	0	0,21978022	1,56E-14	n.s	0,634249471	0	0,634249471	3,43E-14	n.s
PABPN1L	NaN	n.s	0.527986825343542	n.s	1,538461538	0	1,538461538	1,97E-06	n.s	2,325581395	0	2,325581395	0,000721163	n.s
C6orf10	NaN	n.s	3.3621900390056e-54	lusc	2,197802198	0	2,197802198	0,00018585	n.s	46,30021142	0	46,30021142	0,896263225	n.s
CBLN2	NaN	n.s	4.26759565059903e-16	lusc	5,714285714	0	5,714285714	0,111852795	n.s	25,36997886	0	25,36997886	0,840602883	n.s
CTRB1	NaN	n.s	0.202800869350275	n.s	0,879120879	0	0,879120879	1,83E-11	n.s	2,114164905	0	2,114164905	0,000303668	n.s
FAM69C	NaN	n.s	1.10388513676124e-28	lusc	11,64835165	0	11,64835165	0,608425629	n.s	44,82029598	0	44,82029598	0,899886406	n.s
SHISA7	NaN	n.s	1.14816292077532e-25	lusc	3,296703297	0	3,296703297	0,005883465	n.s	28,9640592	0	28,9640592	0,862169994	n.s
DUSP13	NaN	n.s	0.07021967682875	n.s	50,54945055	0	50,54945055	0,815270474	n.s	44,397463	0	44,397463	0,900880741	n.s
GABRQ	NaN	n.s	8.26099602402248e-110	lusc	15,6043956	0	15,6043956	0,751959027	n.s	88,794926	0	88,794926	0,175821402	n.s
CT83	NaN	n.s	1.69815585430912e-07	luad	50,10989011	0	50,10989011	0,818959441	n.s	32,98097252	0	32,98097252	0,879701576	n.s
ANGPTL3	NaN	n.s	0.426069139791303	n.s	16,92307692	0	16,92307692	0,780548478	n.s	14,79915433	0	14,79915433	0,690152456	n.s
SOHLH2	NaN	n.s	0.501178159169675	n.s	40	0	40	0,880584105	n.s	37,63213531	0	37,63213531	0,894627847	n.s
REC114	NaN	n.s	0.178565974594837	n.s	12,74725275	0	12,74725275	0,66009407	n.s	16,06765328	0	16,06765328	0,721909695	n.s
RPEL1	NaN	n.s	0.0725060459811969	n.s	10,76923077	0	10,76923077	0,557915295	n.s	7,188160677	0	7,188160677	0,25546501	n.s
KCNQ2	NaN	n.s	0.267546535186997	n.s	23,07692308	0	23,07692308	0,857830286	n.s	19,87315011	0	19,87315011	0,787598969	n.s
PSMA2	NaN	n.s	2.8021692832107e-08	lusc	0,879120879	0	0,879120879	1,83E-11	n.s	9,090909091	0	9,090909091	0,416699121	n.s
NANOG	NaN	n.s	0.93565511866625	n.s	1,978021978	0	1,978021978	5,78E-05	n.s	1,691331924	0	1,691331924	2,85E-05	n.s
NUTM2E	NaN	n.s	0.289113351209497	n.s	2,417582418	0	2,417582418	0,000478719	n.s	1,268498943	0	1,268498943	4,87E-07	n.s
PTGES3L-AARSD1	NaN	n.s	1.19986132450426e-26	lusc	5,934065934	0	5,934065934	0,130578333	n.s	34,46088795	0	34,46088795	0,884957039	n.s
SPINK4	NaN	n.s	2.20557123906892e-26	luad	33,84615385	0	33,84615385	0,903779203	n.s	5,919661734	0	5,919661734	0,141986149	n.s
KRT12	NaN	n.s	0.452281693679325	n.s	10,32967033	0	10,32967033	0,529123074	n.s	8,66807611	0	8,66807611	0,383784797	n.s
TLX2	NaN	n.s	1.26681930712933e-36	lusc	26,81318681	0	26,81318681	0,882212273	n.s	68,49894292	0	68,49894292	0,78541837	n.s
TBC1D29	NaN	n.s	0.128149531838693	n.s	14,06593407	0	14,06593407	0,708768642	n.s	10,57082452	0	10,57082452	0,515994466	n.s
ISM2	NaN	n.s	1.13275782763897e-62	lusc	16,7032967	0	16,7032967	0,776222621	n.s	71,45877378	0	71,45877378	0,752242988	n.s
C12orf50	NaN	n.s	0.0112249692482651	n.s	0,659340659	0	0,659340659	1,56E-14	n.s	3,171247357	0	3,171247357	0,007090406	n.s
FAM9C	NaN	n.s	0.999999999999999	n.s	4,835164835	0	4,835164835	0,052352371	n.s	4,651162791	0	4,651162791	0,052230559	n.s
PRSS48	NaN	n.s	0.347749452073841	n.s	3,076923077	0	3,076923077	0,003614893	n.s	1,902748414	0	1,902748414	0,000107006	n.s
RAD51AP2	NaN	n.s	1.28268527746318e-75	lusc	15,82417582	0	15,82417582	0,757193007	n.s	76,32135307	0	76,32135307	0,67289073	n.s
C8orf89	NaN	n.s	0.433220710296889	n.s	4,175824176	0	4,175824176	0,025035949	n.s	5,496828753	0	5,496828753	0,107949818	n.s
GALR1	NaN	n.s	0.157199488846652	n.s	3,076923077	0	3,076923077	0,003614893	n.s	1,479915433	0	1,479915433	5,05E-06	n.s
ZBTB9	NaN	n.s	0.0642795840146377	n.s	1,318681319	0	1,318681319	1,51E-07	n.s	3,382663848	0	3,382663848	0,01036677	n.s
OR2B11	NaN	n.s	0.98451350444723	n.s	0,21978022	0	0,21978022	1,56E-14	n.s	0	0	0	NA	n.s
WFDC10A	NaN	n.s	3.26583808983839e-05	n.s	5,054945055	0	5,054945055	0,063729344	n.s	0,422832981	0	0,422832981	2,24E-14	n.s
ERAS	NaN	n.s	0.00472204166117455	n.s	10,76923077	0	10,76923077	0,557915295	n.s	5,496828753	0	5,496828753	0,107949818	n.s
LEP	NaN	n.s	0.0699376557774122	n.s	0,659340659	0	0,659340659	1,56E-14	n.s	2,325581395	0	2,325581395	0,000721163	n.s
BARX1	NaN	n.s	3.87531113511015e-12	lusc	52,74725275	0	52,74725275	0,795065069	n.s	74,84143763	0	74,84143763	0,701245863	n.s
UGT3A1	NaN	n.s	0.000258824145367211	n.s	11,64835165	0	11,64835165	0,608425629	n.s	20,71881607	0	20,71881607	0,798114318	n.s
GOLGA6L7	NaN	n.s	5.87083879379741e-08	lusc	19,56043956	0	19,56043956	0,822116456	n.s	35,72938689	0	35,72938689	0,889061784	n.s
FSHR	NaN	n.s	0.496164160340585	n.s	0	0	0	NA	n.s	0,422832981	0	0,422832981	2,24E-14	n.s
SLC2A7	NaN	n.s	0.268906248272604	n.s	5,054945055	0	5,054945055	0,063729344	n.s	3,382663848	0	3,382663848	0,01036677	n.s
OR8G5	NaN	n.s	0.786191572669276	n.s	2,857142857	0	2,857142857	0,002066819	n.s	3,382663848	0	3,382663848	0,01036677	n.s
APOA2	NaN	n.s	0.131613506109056	n.s	2,417582418	0	2,417582418	0,000478719	n.s	4,4397463	0	4,4397463	0,041843083	n.s
TRPC5OS	NaN	n.s	0.999999999999998	n.s	3,516483516	0	3,516483516	0,009048815	n.s	3,382663848	0	3,382663848	0,01036677	n.s
ALX1	NaN	n.s	3.71172896600565e-19	lusc	19,56043956	0	19,56043956	0,822116456	n.s	47,56871036	0	47,56871036	0,892966866	n.s
GABRA3	NaN	n.s	3.52038995870701e-84	lusc	31,64835165	0	31,64835165	0,902689818	n.s	93,44608879	0	93,44608879	0,015128401	n.s
CABP5	NaN	n.s	0.98451350444723	n.s	0,21978022	0	0,21978022	1,56E-14	n.s	0	0	0	NA	n.s
ANP32D	NaN	n.s	0.312326633754298	n.s	0,43956044	0	0,43956044	1,56E-14	n.s	1,268498943	0	1,268498943	4,87E-07	n.s
FAM131C	NaN	n.s	4.92877523602916e-70	lusc	40	0	40	0,880584105	n.s	94,50317125	0	94,50317125	0,00510521	super_up
SLC36A3	NaN	n.s	0.999999999999998	n.s	0,659340659	0	0,659340659	1,56E-14	n.s	0,845665962	0	0,845665962	1,42E-10	n.s
TEDDM1	NaN	n.s	0.0312985083493292	n.s	4,395604396	0	4,395604396	0,032893993	n.s	8,033826638	0	8,033826638	0,33090875	n.s
HIST1H2BL	NaN	n.s	7.51080903557139e-09	lusc	29,67032967	0	29,67032967	0,895397887	n.s	48,41437632	0	48,41437632	0,890662727	n.s
MDGA2	NaN	n.s	0.00251455441600117	n.s	11,64835165	0	11,64835165	0,608425629	n.s	19,02748414	0	19,02748414	0,775871502	n.s
TAL2	NaN	n.s	0.000380945646742168	n.s	3,516483516	0	3,516483516	0,009048815	n.s	9,513742072	0	9,513742072	0,447596662	n.s
C17orf78	NaN	n.s	0.984635341293243	n.s	12,30769231	0	12,30769231	0,640801001	n.s	12,05073996	0	12,05073996	0,592467909	n.s
LMO1	NaN	n.s	2.81987110159918e-20	lusc	16,26373626	0	16,26373626	0,767070301	n.s	44,397463	0	44,397463	0,900880741	n.s
C14orf39	NaN	n.s	0.901027834780008	n.s	29,01098901	0	29,01098901	0,892665914	n.s	29,59830867	0	29,59830867	0,865319512	n.s
EPO	NaN	n.s	2.39462325121154e-25	lusc	6,153846154	0	6,153846154	0,150368874	n.s	33,82663848	0	33,82663848	0,882770394	n.s
USH1G	NaN	n.s	1.88570716669275e-82	lusc	28,13186813	0	28,13186813	0,888750747	n.s	90,27484144	0	90,27484144	0,103448537	n.s
STRC	NaN	n.s	7.437913868095e-14	lusc	27,91208791	0	27,91208791	0,887719304	n.s	52,21987315	0	52,21987315	0,879069392	n.s
OR52N2	NaN	n.s	1.25810591550146e-06	n.s	12,74725275	0	12,74725275	0,66009407	n.s	3,805496829	0	3,805496829	0,020214634	n.s
NKX3-2	NaN	n.s	1.41977821134374e-29	lusc	39,78021978	0	39,78021978	0,881552464	n.s	76,53276956	0	76,53276956	0,668470778	n.s
SPDYC	NaN	n.s	5.88061053385122e-06	n.s	14,72527473	0	14,72527473	0,728805475	n.s	27,06131078	0	27,06131078	0,851630431	n.s
SPATA19	NaN	n.s	1.26313748311648e-11	lusc	0,21978022	0	0,21978022	1,56E-14	n.s	10,57082452	0	10,57082452	0,515994466	n.s
SCRT1	NaN	n.s	0.306181578832787	n.s	13,40659341	0	13,40659341	0,686015395	n.s	10,99365751	0	10,99365751	0,539984328	n.s
HIST1H2BE	NaN	n.s	0.0043726931863866	n.s	30,98901099	0	30,98901099	0,90039761	n.s	40,16913319	0	40,16913319	0,901129785	n.s
PPEF2	NaN	n.s	0.161937985288397	n.s	1,538461538	0	1,538461538	1,97E-06	n.s	0,422832981	0	0,422832981	2,24E-14	n.s
TAS2R43	NaN	n.s	0.412131144535325	n.s	2,637362637	0	2,637362637	0,001049743	n.s	3,805496829	0	3,805496829	0,020214634	n.s
PRLH	NaN	n.s	0.999999999999998	n.s	0	0	0	NA	n.s	0,21141649	0	0,21141649	2,24E-14	n.s
BRDT	NaN	n.s	8.83268655414724e-07	n.s	39,56043956	0	39,56043956	0,882508988	n.s	24,31289641	0	24,31289641	0,832728833	n.s
SLC24A2	NaN	n.s	2.61021823884307e-20	lusc	66,81318681	0	66,81318681	0,551680958	n.s	91,54334038	0	91,54334038	0,054854272	n.s
CCDC63	NaN	n.s	0.00613094683787908	n.s	1,098901099	0	1,098901099	4,22E-09	n.s	4,22832981	0	4,22832981	0,033934328	n.s
PLAC1	NaN	n.s	6.41594787302784e-12	lusc	52,74725275	0	52,74725275	0,795065069	n.s	74,63002114	0	74,63002114	0,704955773	n.s
PDYN	NaN	n.s	0.764143629186349	n.s	0,659340659	0	0,659340659	1,56E-14	n.s	1,057082452	0	1,057082452	1,96E-08	n.s
RNF222	NaN	n.s	2.59643941345908e-14	lusc	20,87912088	0	20,87912088	0,837510018	n.s	44,60887949	0	44,60887949	0,900385756	n.s
MAGEA8	NaN	n.s	0.0390611005565544	n.s	14,72527473	0	14,72527473	0,728805475	n.s	20,0845666	0	20,0845666	0,790334282	n.s
DMRTA2	NaN	n.s	3.81754642596428e-17	lusc	47,25274725	0	47,25274725	0,840482297	n.s	74,41860465	0	74,41860465	0,708587134	n.s
FAM71A	NaN	n.s	NaN	n.s	0	0	0	NA	n.s	0	0	0	NA	n.s
NLRP4	NaN	n.s	0.359109754235941	n.s	3,076923077	0	3,076923077	0,003614893	n.s	4,4397463	0	4,4397463	0,041843083	n.s
ISL1	NaN	n.s	4.84403063821108e-06	n.s	22,63736264	0	22,63736264	0,854206578	n.s	36,57505285	0	36,57505285	0,891617126	n.s
MIOX	NaN	n.s	5.06508721021986e-19	luad	35,6043956	0	35,6043956	0,897902835	n.s	10,78224101	0	10,78224101	0,528218081	n.s
RHBG	NaN	n.s	4.05113474482955e-06	n.s	74,28571429	0	74,28571429	0,302325247	n.s	59,83086681	0	59,83086681	0,8474086	n.s
CTAGE9	NaN	n.s	0.301504713081687	n.s	11,86813187	0	11,86813187	0,619704692	n.s	14,37632135	0	14,37632135	0,67800077	n.s
GP2	NaN	n.s	0.00620615892809599	n.s	5,494505495	0	5,494505495	0,094369418	n.s	1,902748414	0	1,902748414	0,000107006	n.s
GRIFIN	NaN	n.s	0.233871252997515	n.s	0,659340659	0	0,659340659	1,56E-14	n.s	0	0	0	NA	n.s
C14orf178	NaN	n.s	0.999999999999999	n.s	0,43956044	0	0,43956044	1,56E-14	n.s	0,422832981	0	0,422832981	2,24E-14	n.s
C16orf90	NaN	n.s	5.65113516371643e-05	n.s	0,879120879	0	0,879120879	1,83E-11	n.s	5,919661734	0	5,919661734	0,141986149	n.s
OXT	NaN	n.s	2.04952345389177e-13	luad	24,3956044	0	24,3956044	0,867624242	n.s	6,765327696	0	6,765327696	0,216832269	n.s
SLC22A13	NaN	n.s	0.00275791988522131	n.s	2,417582418	0	2,417582418	0,000478719	n.s	6,765327696	0	6,765327696	0,216832269	n.s
TRIM40	NaN	n.s	8.83653982205672e-10	luad	14,06593407	0	14,06593407	0,708768642	n.s	2,748414376	0	2,748414376	0,002687623	n.s
C19orf67	NaN	n.s	0.00114891218382226	n.s	7,692307692	0	7,692307692	0,303063289	n.s	2,748414376	0	2,748414376	0,002687623	n.s
RPL36A-HNRNPH2	NaN	n.s	0.644304689074223	n.s	4,175824176	0	4,175824176	0,025035949	n.s	3,382663848	0	3,382663848	0,01036677	n.s
NLRP9	NaN	n.s	0.772663807571379	n.s	6,813186813	0	6,813186813	0,214226	n.s	6,131078224	0	6,131078224	0,160067562	n.s
EPPIN-WFDC6	NaN	n.s	NaN	n.s	0	0	0	NA	n.s	0	0	0	NA	n.s
UCN2	NaN	n.s	5.59985133969001e-77	lusc	31,42857143	0	31,42857143	0,901940038	n.s	90,90909091	0	90,90909091	0,077248226	n.s
GOLGA8T	NaN	n.s	0.643872600473618	n.s	0,21978022	0	0,21978022	1,56E-14	n.s	0,634249471	0	0,634249471	3,43E-14	n.s
CCDC27	NaN	n.s	0.222944673275428	n.s	13,84615385	0	13,84615385	0,701507023	n.s	10,99365751	0	10,99365751	0,539984328	n.s
AIRE	NaN	n.s	0.00023544668525891	n.s	2,417582418	0	2,417582418	0,000478719	n.s	8,033826638	0	8,033826638	0,33090875	n.s
SCN10A	NaN	n.s	0.999999999999999	n.s	1,538461538	0	1,538461538	1,97E-06	n.s	1,479915433	0	1,479915433	5,05E-06	n.s
MYPN	NaN	n.s	0.000230681116801448	n.s	15,82417582	0	15,82417582	0,757193007	n.s	7,822410148	0	7,822410148	0,312472118	n.s
RBFOX1	NaN	n.s	0.0519583030457	n.s	14,06593407	0	14,06593407	0,708768642	n.s	9,725158562	0	9,725158562	0,46227847	n.s
CFHR1	NaN	n.s	0.0236019668204689	n.s	5,054945055	0	5,054945055	0,063729344	n.s	9,090909091	0	9,090909091	0,416699121	n.s
CCDC196	NaN	n.s	0.000514273982329379	n.s	4,395604396	0	4,395604396	0,032893993	n.s	0,634249471	0	0,634249471	3,43E-14	n.s
ZSCAN5C	NaN	n.s	0.0195372059900183	n.s	1,318681319	0	1,318681319	1,51E-07	n.s	4,016913319	0	4,016913319	0,026653234	n.s
KRT73	NaN	n.s	4.35558752267179e-05	n.s	0	0	0	NA	n.s	4,016913319	0	4,016913319	0,026653234	n.s
POTEI	NaN	n.s	0.0869203851891965	n.s	4,175824176	0	4,175824176	0,025035949	n.s	6,976744186	0	6,976744186	0,236148644	n.s
CDSN	NaN	n.s	4.35044975965285e-05	n.s	11,86813187	0	11,86813187	0,619704692	n.s	22,1987315	0	22,1987315	0,814093086	n.s
HSFX1	NaN	n.s	0.202800869350275	n.s	0,879120879	0	0,879120879	1,83E-11	n.s	2,114164905	0	2,114164905	0,000303668	n.s
LRFN2	NaN	n.s	0.605576767396151	n.s	19,56043956	0	19,56043956	0,822116456	n.s	21,14164905	0	21,14164905	0,802971578	n.s
C6orf222	NaN	n.s	2.32105070697951e-07	luad	43,95604396	0	43,95604396	0,860887915	n.s	27,48414376	0	27,48414376	0,854127333	n.s
ARPP21	NaN	n.s	0.0915384271780887	n.s	0,879120879	0	0,879120879	1,83E-11	n.s	2,536997886	0	2,536997886	0,00146747	n.s
EMX1	NaN	n.s	1.03429358370632e-47	lusc	25,71428571	0	25,71428571	0,876049929	n.s	73,57293869	0	73,57293869	0,722367743	n.s
S100A7	NaN	n.s	3.93476144843314e-89	lusc	10,10989011	0	10,10989011	0,513776038	n.s	75,4756871	0	75,4756871	0,689623233	n.s
C1orf195	NaN	n.s	0.582914937907307	n.s	2,417582418	0	2,417582418	0,000478719	n.s	1,691331924	0	1,691331924	2,85E-05	n.s
PCDH11Y	NaN	n.s	0.0915384271780887	n.s	0,879120879	0	0,879120879	1,83E-11	n.s	2,536997886	0	2,536997886	0,00146747	n.s
FAM205A	NaN	n.s	6.35285518251958e-08	lusc	1,758241758	0	1,758241758	1,33E-05	n.s	10,57082452	0	10,57082452	0,515994466	n.s
HTR6	NaN	n.s	3.01787905309071e-07	lusc	8,571428571	0	8,571428571	0,387901866	n.s	20,71881607	0	20,71881607	0,798114318	n.s
KCNV1	NaN	n.s	0.466671422140172	n.s	23,51648352	0	23,51648352	0,861265698	n.s	25,79281184	0	25,79281184	0,843528333	n.s
HIST1H4J	NaN	n.s	0.00285872302531873	n.s	18,24175824	0	18,24175824	0,803465788	n.s	26,6384778	0	26,6384778	0,849035587	n.s
NPBWR1	NaN	n.s	4.36084672710661e-42	lusc	23,95604396	0	23,95604396	0,864526262	n.s	68,71035941	0	68,71035941	0,783322572	n.s
EN2	NaN	n.s	9.25826786766098e-13	lusc	49,45054945	0	49,45054945	0,824292451	n.s	72,51585624	0	72,51585624	0,738058972	n.s
CRP	NaN	n.s	0.26339952826663	n.s	1,978021978	0	1,978021978	5,78E-05	n.s	3,382663848	0	3,382663848	0,01036677	n.s
MYL1	NaN	n.s	0.948390602557612	n.s	1,318681319	0	1,318681319	1,51E-07	n.s	1,057082452	0	1,057082452	1,96E-08	n.s
AMTN	NaN	n.s	2.11871987581763e-57	lusc	2,197802198	0	2,197802198	0,00018585	n.s	48,20295983	0	48,20295983	0,891247128	n.s
EPYC	NaN	n.s	0.806501184498645	n.s	50,98901099	0	50,98901099	0,811469913	n.s	52,00845666	0	52,00845666	0,879772303	n.s
BCL2L10	NaN	n.s	4.00089826496788e-34	lusc	46,15384615	0	46,15384615	0,847755915	n.s	84,3551797	0	84,3551797	0,410373552	n.s
FABP7	NaN	n.s	3.37024900038752e-15	lusc	12,74725275	0	12,74725275	0,66009407	n.s	35,09513742	0	35,09513742	0,887052233	n.s
CCL25	NaN	n.s	1	n.s	29,23076923	0	29,23076923	0,893595099	n.s	29,17547569	0	29,17547569	0,86323826	n.s
C4orf51	NaN	n.s	8.67788816886795e-15	lusc	3,956043956	0	3,956043956	0,018624452	n.s	21,14164905	0	21,14164905	0,802971578	n.s
INSRR	NaN	n.s	1.80898359062135e-06	n.s	18,46153846	0	18,46153846	0,806839115	n.s	32,34672304	0	32,34672304	0,877275882	n.s
OR5P2	NaN	n.s	1	n.s	0,43956044	0	0,43956044	1,56E-14	n.s	0,634249471	0	0,634249471	3,43E-14	n.s
GRIA2	NaN	n.s	8.91401395506502e-06	n.s	5,274725275	0	5,274725275	0,078285304	n.s	14,16490486	0	14,16490486	0,67158978	n.s
MLNR	NaN	n.s	0.810237719980827	n.s	9,67032967	0	9,67032967	0,481112045	n.s	10,35940803	0	10,35940803	0,503300102	n.s
TEX11	NaN	n.s	9.06292752803189e-10	lusc	32,52747253	0	32,52747253	0,905554575	n.s	52,64270613	0	52,64270613	0,877640423	n.s
GJA9	NaN	n.s	0.165921125762909	n.s	0,659340659	0	0,659340659	1,56E-14	n.s	1,902748414	0	1,902748414	0,000107006	n.s
HOXB9	NaN	n.s	6.0819374486612e-09	lusc	44,83516484	0	44,83516484	0,85584719	n.s	64,05919662	0	64,05919662	0,822076889	n.s
POU4F3	NaN	n.s	0.00312902882066285	n.s	7,472527473	0	7,472527473	0,280941555	n.s	2,959830867	0	2,959830867	0,004544091	n.s
SULT1A3	NaN	n.s	0.488789071086735	n.s	7,032967033	0	7,032967033	0,236376804	n.s	5,708245243	0	5,708245243	0,124564593	n.s
TCF24	NaN	n.s	1.45831587921846e-24	lusc	36,92307692	0	36,92307692	0,893129878	n.s	70,61310782	0	70,61310782	0,76263005	n.s
ZIC2	NaN	n.s	2.91738987814129e-53	lusc	33,18681319	0	33,18681319	0,905850837	n.s	83,08668076	0	83,08668076	0,467387231	n.s
GUCY2F	NaN	n.s	0.999999999999999	n.s	0,659340659	0	0,659340659	1,56E-14	n.s	0,634249471	0	0,634249471	3,43E-14	n.s
HTR3E	NaN	n.s	2.9207866245917e-05	n.s	2,197802198	0	2,197802198	0,00018585	n.s	8,66807611	0	8,66807611	0,383784797	n.s
NPY	NaN	n.s	0.011003466697574	n.s	5,934065934	0	5,934065934	0,130578333	n.s	10,78224101	0	10,78224101	0,528218081	n.s
CAGE1	NaN	n.s	1.10046285965985e-55	lusc	16,04395604	0	16,04395604	0,762226836	n.s	67,23044397	0	67,23044397	0,797244952	n.s
ISY1-RAB43	NaN	n.s	0.237491622022908	n.s	0,21978022	0	0,21978022	1,56E-14	n.s	1,057082452	0	1,057082452	1,96E-08	n.s
TSHB	NaN	n.s	NaN	n.s	0	0	0	NA	n.s	0	0	0	NA	n.s
NXF5	NaN	n.s	0.717369520659788	n.s	0,43956044	0	0,43956044	1,56E-14	n.s	0,845665962	0	0,845665962	1,42E-10	n.s
USP50	NaN	n.s	1	n.s	0,43956044	0	0,43956044	1,56E-14	n.s	0,634249471	0	0,634249471	3,43E-14	n.s
RPRML	NaN	n.s	0.0523554603733818	n.s	3,076923077	0	3,076923077	0,003614893	n.s	1,057082452	0	1,057082452	1,96E-08	n.s
CHRNG	NaN	n.s	3.01787905309071e-07	lusc	8,571428571	0	8,571428571	0,387901866	n.s	20,71881607	0	20,71881607	0,798114318	n.s
TSPYL6	NaN	n.s	0.363093752867538	n.s	3,296703297	0	3,296703297	0,005883465	n.s	2,114164905	0	2,114164905	0,000303668	n.s
REG4	NaN	n.s	6.59500336236347e-05	n.s	20,21978022	0	20,21978022	0,830169191	n.s	10,57082452	0	10,57082452	0,515994466	n.s
KNCN	NaN	n.s	0.589155886148457	n.s	0,659340659	0	0,659340659	1,56E-14	n.s	0,21141649	0	0,21141649	2,24E-14	n.s
TERB1	NaN	n.s	0.0157501742244759	n.s	5,934065934	0	5,934065934	0,130578333	n.s	2,536997886	0	2,536997886	0,00146747	n.s
MAS1	NaN	n.s	0.0304371113027098	n.s	0,21978022	0	0,21978022	1,56E-14	n.s	1,902748414	0	1,902748414	0,000107006	n.s
OR51E1	NaN	n.s	0.0511470857199264	n.s	36,48351648	0	36,48351648	0,894757835	n.s	30,23255814	0	30,23255814	0,868310212	n.s
PDC	NaN	n.s	0.314303642236605	n.s	3,516483516	0	3,516483516	0,009048815	n.s	5,073995772	0	5,073995772	0,077701469	n.s
SLC36A2	NaN	n.s	0.143018668418884	n.s	0	0	0	NA	n.s	0,845665962	0	0,845665962	1,42E-10	n.s
PLPPR5	NaN	n.s	0.261381200708812	n.s	0	0	0	NA	n.s	0,634249471	0	0,634249471	3,43E-14	n.s
CALHM3	NaN	n.s	0.347971041115527	n.s	12,30769231	0	12,30769231	0,640801001	n.s	10,14799154	0	10,14799154	0,490122766	n.s
ATP11AUN	NaN	n.s	2.29662386026864e-12	luad	13,40659341	0	13,40659341	0,686015395	n.s	1,268498943	0	1,268498943	4,87E-07	n.s
C7orf77	NaN	n.s	0.999999999999999	n.s	0,879120879	0	0,879120879	1,83E-11	n.s	1,057082452	0	1,057082452	1,96E-08	n.s
SNCB	NaN	n.s	1.45815957206677e-31	lusc	3,296703297	0	3,296703297	0,005883465	n.s	33,4038055	0	33,4038055	0,881258719	n.s
INSM2	NaN	n.s	0.0188564557582771	n.s	2,857142857	0	2,857142857	0,002066819	n.s	0,634249471	0	0,634249471	3,43E-14	n.s
MPPED1	NaN	n.s	7.09552405575554e-68	lusc	3,076923077	0	3,076923077	0,003614893	n.s	55,602537	0	55,602537	0,866682942	n.s
QRFPR	NaN	n.s	8.82572043848945e-32	lusc	0,659340659	0	0,659340659	1,56E-14	n.s	28,11839323	0	28,11839323	0,857700778	n.s
CPSF4L	NaN	n.s	5.38334589925464e-14	lusc	6,373626374	0	6,373626374	0,171035397	n.s	24,5243129	0	24,5243129	0,834371761	n.s
CELA2A	NaN	n.s	0.999999999999999	n.s	0,659340659	0	0,659340659	1,56E-14	n.s	0,634249471	0	0,634249471	3,43E-14	n.s
SPRR1A	NaN	n.s	5.76737446769543e-95	lusc	7,472527473	0	7,472527473	0,280941555	n.s	74,63002114	0	74,63002114	0,704955773	n.s
C13orf42	NaN	n.s	0.999999999999998	n.s	0,879120879	0	0,879120879	1,83E-11	n.s	0,845665962	0	0,845665962	1,42E-10	n.s
PAX1	NaN	n.s	6.11302877801516e-25	lusc	4,395604396	0	4,395604396	0,032893993	n.s	30,44397463	0	30,44397463	0,869273896	n.s
PRSS42	NaN	n.s	0.019440579717725	n.s	16,48351648	0	16,48351648	0,771732648	n.s	10,99365751	0	10,99365751	0,539984328	n.s
IGFL4	NaN	n.s	1.91525990054026e-55	lusc	26,37362637	0	26,37362637	0,879831954	n.s	78,01268499	0	78,01268499	0,6345821	n.s
KCNC1	NaN	n.s	1.09862375110033e-18	lusc	4,175824176	0	4,175824176	0,025035949	n.s	24,94714588	0	24,94714588	0,837553325	n.s
SPDYE16	NaN	n.s	0.372214021215536	n.s	0,659340659	0	0,659340659	1,56E-14	n.s	1,479915433	0	1,479915433	5,05E-06	n.s
RNF17	NaN	n.s	0.011222757514421	n.s	1,538461538	0	1,538461538	1,97E-06	n.s	4,651162791	0	4,651162791	0,052230559	n.s
GABRG3	NaN	n.s	1.17629212812761e-17	lusc	17,58241758	0	17,58241758	0,792617318	n.s	43,76321353	0	43,76321353	0,902340131	n.s
C10orf71	NaN	n.s	7.80363667787251e-13	luad	18,46153846	0	18,46153846	0,806839115	n.s	3,594080338	0	3,594080338	0,014796286	n.s
C1orf146	NaN	n.s	0.748070283181563	n.s	2,197802198	0	2,197802198	0,00018585	n.s	1,691331924	0	1,691331924	2,85E-05	n.s
CRABP1	NaN	n.s	0.000308623939437954	n.s	23,2967033	0	23,2967033	0,859570659	n.s	34,24947146	0	34,24947146	0,88423862	n.s
TMPRSS12	NaN	n.s	0.26303745386056	n.s	3,736263736	0	3,736263736	0,013285131	n.s	5,496828753	0	5,496828753	0,107949818	n.s
NOTO	NaN	n.s	1.67486237039717e-21	luad	23,73626374	0	23,73626374	0,862917043	n.s	2,536997886	0	2,536997886	0,00146747	n.s
LRRC38	NaN	n.s	1.90690741036192e-18	lusc	5,494505495	0	5,494505495	0,094369418	n.s	27,06131078	0	27,06131078	0,851630431	n.s
NT5C1A	NaN	n.s	2.149766674689e-21	luad	20,43956044	0	20,43956044	0,832690821	n.s	1,057082452	0	1,057082452	1,96E-08	n.s
DLK1	NaN	n.s	0.519216646543517	n.s	12,30769231	0	12,30769231	0,640801001	n.s	13,95348837	0	13,95348837	0,664941562	n.s
ANKRD20A1	NaN	n.s	0.0122043396547213	n.s	1,978021978	0	1,978021978	5,78E-05	n.s	5,285412262	0	5,285412262	0,092284465	n.s
MTRNR2L6	NaN	n.s	0.215583391578755	n.s	3,956043956	0	3,956043956	0,018624452	n.s	2,325581395	0	2,325581395	0,000721163	n.s
KLK8	NaN	n.s	3.85850383162928e-21	lusc	25,71428571	0	25,71428571	0,876049929	n.s	56,44820296	0	56,44820296	0,863206851	n.s
CPN2	NaN	n.s	0.865466478663264	n.s	8,351648352	0	8,351648352	0,367407569	n.s	8,8794926	0	8,8794926	0,400489398	n.s
NKAIN1	NaN	n.s	6.08361903717803e-43	lusc	42,1978022	0	42,1978022	0,87020479	n.s	85,62367865	0	85,62367865	0,347238441	n.s
GJD3	NaN	n.s	0.0642795840146377	n.s	1,318681319	0	1,318681319	1,51E-07	n.s	3,382663848	0	3,382663848	0,01036677	n.s
CCKBR	NaN	n.s	5.29207889824574e-08	lusc	9,89010989	0	9,89010989	0,497775685	n.s	23,46723044	0	23,46723044	0,825782464	n.s
KRT36	NaN	n.s	1.14122849024043e-15	lusc	2,857142857	0	2,857142857	0,002066819	n.s	19,87315011	0	19,87315011	0,787598969	n.s
SPATA21	NaN	n.s	0.0593371866678452	n.s	7,032967033	0	7,032967033	0,236376804	n.s	10,78224101	0	10,78224101	0,528218081	n.s
AKR1B15	NaN	n.s	5.82491305198484e-31	lusc	41,75824176	0	41,75824176	0,872386981	n.s	79,06976744	0	79,06976744	0,606841626	n.s
KRTAP5-8	NaN	n.s	0.000824014736004643	n.s	3,516483516	0	3,516483516	0,009048815	n.s	9,090909091	0	9,090909091	0,416699121	n.s
KLK6	NaN	n.s	8.89723045699118e-17	lusc	39,78021978	0	39,78021978	0,881552464	n.s	67,23044397	0	67,23044397	0,797244952	n.s
ARID3C	NaN	n.s	3.07956765349006e-05	n.s	12,52747253	0	12,52747253	0,650662248	n.s	23,25581395	0	23,25581395	0,823945926	n.s
HYAL4	NaN	n.s	0.464989212894584	n.s	6,373626374	0	6,373626374	0,171035397	n.s	7,822410148	0	7,822410148	0,312472118	n.s
SLC22A8	NaN	n.s	0.999999999999999	n.s	0,659340659	0	0,659340659	1,56E-14	n.s	0,634249471	0	0,634249471	3,43E-14	n.s
ZDHHC22	NaN	n.s	3.36964727348422e-06	n.s	4,395604396	0	4,395604396	0,032893993	n.s	13,3192389	0	13,3192389	0,643461693	n.s
SLC24A5	NaN	n.s	0.0360881550738717	n.s	1,318681319	0	1,318681319	1,51E-07	n.s	0	0	0	NA	n.s
C17orf47	NaN	n.s	0.00350623682456474	n.s	9,230769231	0	9,230769231	0,445780319	n.s	4,22832981	0	4,22832981	0,033934328	n.s
DEFB131B	NaN	n.s	0.98255297949547	n.s	6,593406593	0	6,593406593	0,19238467	n.s	6,342494715	0	6,342494715	0,178662404	n.s
CTCFL	NaN	n.s	1.21495134518433e-24	lusc	4,175824176	0	4,175824176	0,025035949	n.s	29,80972516	0	29,80972516	0,866333451	n.s
HOXC5	NaN	n.s	0.0011325553382753	n.s	13,40659341	0	13,40659341	0,686015395	n.s	21,77589852	0	21,77589852	0,809809344	n.s
UBL4B	NaN	n.s	0.0571762463803864	n.s	8,791208791	0	8,791208791	0,407819354	n.s	12,89640592	0	12,89640592	0,627742091	n.s
TMEM215	NaN	n.s	3.60313929482431e-06	n.s	20	0	20	0,827568576	n.s	9,090909091	0	9,090909091	0,416699121	n.s
NPAP1	NaN	n.s	0.497509143152232	n.s	1,318681319	0	1,318681319	1,51E-07	n.s	2,114164905	0	2,114164905	0,000303668	n.s
OBP2A	NaN	n.s	0.00134378291740907	n.s	21,75824176	0	21,75824176	0,846333698	n.s	13,53065539	0	13,53065539	0,650889188	n.s
GDF2	NaN	n.s	0.999999999999998	n.s	0	0	0	NA	n.s	0,21141649	0	0,21141649	2,24E-14	n.s
MEP1B	NaN	n.s	0.999999999999998	n.s	5,494505495	0	5,494505495	0,094369418	n.s	5,285412262	0	5,285412262	0,092284465	n.s
C5orf47	NaN	n.s	0.000121166865002961	n.s	7,032967033	0	7,032967033	0,236376804	n.s	1,691331924	0	1,691331924	2,85E-05	n.s
LRRD1	NaN	n.s	0.268906248272604	n.s	5,054945055	0	5,054945055	0,063729344	n.s	3,382663848	0	3,382663848	0,01036677	n.s
POTEJ	NaN	n.s	0.029323524819767	n.s	1,318681319	0	1,318681319	1,51E-07	n.s	3,805496829	0	3,805496829	0,020214634	n.s
PROK1	NaN	n.s	0.496474371353266	n.s	3,516483516	0	3,516483516	0,009048815	n.s	2,536997886	0	2,536997886	0,00146747	n.s
GPR45	NaN	n.s	0.731979367661399	n.s	1,758241758	0	1,758241758	1,33E-05	n.s	1,268498943	0	1,268498943	4,87E-07	n.s
GOLGA8Q	NaN	n.s	0.999999999999998	n.s	1,978021978	0	1,978021978	5,78E-05	n.s	1,902748414	0	1,902748414	0,000107006	n.s
LCN15	NaN	n.s	0.000210113010665775	n.s	9,230769231	0	9,230769231	0,445780319	n.s	3,171247357	0	3,171247357	0,007090406	n.s
FAM205C	NaN	n.s	2.00043986744719e-05	n.s	1,978021978	0	1,978021978	5,78E-05	n.s	8,456659619	0	8,456659619	0,36660228	n.s
CCDC175	NaN	n.s	0.50192063432478	n.s	1,538461538	0	1,538461538	1,97E-06	n.s	0,845665962	0	0,845665962	1,42E-10	n.s
PBOV1	NaN	n.s	0.00194540826351363	n.s	2,417582418	0	2,417582418	0,000478719	n.s	0	0	0	NA	n.s
MYMK	NaN	n.s	0.485666649912995	n.s	3,296703297	0	3,296703297	0,005883465	n.s	2,325581395	0	2,325581395	0,000721163	n.s
IBSP	NaN	n.s	0.695886043516216	n.s	25,71428571	0	25,71428571	0,876049929	n.s	27,06131078	0	27,06131078	0,851630431	n.s
SLC35G6	NaN	n.s	0.595094102684553	n.s	2,637362637	0	2,637362637	0,001049743	n.s	1,902748414	0	1,902748414	0,000107006	n.s
KCNK16	NaN	n.s	1.11938199041007e-08	luad	10,10989011	0	10,10989011	0,513776038	n.s	1,268498943	0	1,268498943	4,87E-07	n.s
C16orf78	NaN	n.s	NaN	n.s	0	0	0	NA	n.s	0	0	0	NA	n.s
GCM1	NaN	n.s	2.31180655681174e-15	luad	30,76923077	0	30,76923077	0,89960418	n.s	9,725158562	0	9,725158562	0,46227847	n.s
NLRP11	NaN	n.s	0.00236137073612847	n.s	12,30769231	0	12,30769231	0,640801001	n.s	19,87315011	0	19,87315011	0,787598969	n.s
RNF103-CHMP3	NaN	n.s	0.594531567068054	n.s	18,9010989	0	18,9010989	0,813253689	n.s	20,50739958	0	20,50739958	0,795589319	n.s
KRT2	NaN	n.s	7.74486512930196e-12	lusc	0,659340659	0	0,659340659	1,56E-14	n.s	11,83932347	0	11,83932347	0,582767146	n.s
PTX4	NaN	n.s	0.0515136009606272	n.s	1,098901099	0	1,098901099	4,22E-09	n.s	3,171247357	0	3,171247357	0,007090406	n.s
TP53TG3D	NaN	n.s	6.83464501106347e-28	lusc	2,637362637	0	2,637362637	0,001049743	n.s	29,38689218	0	29,38689218	0,864287938	n.s
TAF7L	NaN	n.s	2.87386249788873e-10	lusc	35,38461538	0	35,38461538	0,898666786	n.s	56,23678647	0	56,23678647	0,864091781	n.s
KCNV2	NaN	n.s	0.170999690541122	n.s	3,076923077	0	3,076923077	0,003614893	n.s	5,073995772	0	5,073995772	0,077701469	n.s
WDR87	NaN	n.s	7.29911011838795e-07	n.s	20,87912088	0	20,87912088	0,837510018	n.s	9,090909091	0	9,090909091	0,416699121	n.s
ODAPH	NaN	n.s	6.51411790102024e-05	n.s	16,04395604	0	16,04395604	0,762226836	n.s	27,06131078	0	27,06131078	0,851630431	n.s
GAL	NaN	n.s	2.90612201161034e-33	lusc	38,24175824	0	38,24175824	0,888009997	n.s	77,37843552	0	77,37843552	0,64976553	n.s
OR11H7	NaN	n.s	2.65377316001063e-44	lusc	12,52747253	0	12,52747253	0,650662248	n.s	56,44820296	0	56,44820296	0,863206851	n.s
IGDCC3	NaN	n.s	0.829621935431805	n.s	3,736263736	0	3,736263736	0,013285131	n.s	4,22832981	0	4,22832981	0,033934328	n.s
TEX53	NaN	n.s	0.196224759406245	n.s	1,978021978	0	1,978021978	5,78E-05	n.s	3,594080338	0	3,594080338	0,014796286	n.s
TNMD	NaN	n.s	9.79625308554529e-05	n.s	4,615384615	0	4,615384615	0,042148145	n.s	0,422832981	0	0,422832981	2,24E-14	n.s
FAM163A	NaN	n.s	0.288524114571127	n.s	4,175824176	0	4,175824176	0,025035949	n.s	5,919661734	0	5,919661734	0,141986149	n.s
LGI1	NaN	n.s	0.135510273478307	n.s	3,956043956	0	3,956043956	0,018624452	n.s	6,342494715	0	6,342494715	0,178662404	n.s
SPACA3	NaN	n.s	9.99778580246358e-08	luad	9,230769231	0	9,230769231	0,445780319	n.s	1,268498943	0	1,268498943	4,87E-07	n.s
LCN1	NaN	n.s	0.668343681982035	n.s	6,153846154	0	6,153846154	0,150368874	n.s	5,285412262	0	5,285412262	0,092284465	n.s
MGAT4D	NaN	n.s	0.999999999999998	n.s	0	0	0	NA	n.s	0,21141649	0	0,21141649	2,24E-14	n.s
PROKR1	NaN	n.s	0.00369935667521617	n.s	16,04395604	0	16,04395604	0,762226836	n.s	23,89006342	0	23,89006342	0,829333015	n.s
CEACAM16	NaN	n.s	0.0284767196505073	n.s	10,54945055	0	10,54945055	0,543830581	n.s	6,342494715	0	6,342494715	0,178662404	n.s
ZNF560	NaN	n.s	0.131871022292422	n.s	14,50549451	0	14,50549451	0,722403114	n.s	10,99365751	0	10,99365751	0,539984328	n.s
LRRTM3	NaN	n.s	0.420025869306203	n.s	4,395604396	0	4,395604396	0,032893993	n.s	3,171247357	0	3,171247357	0,007090406	n.s
CST1	NaN	n.s	0.340730104193763	n.s	70,76923077	0	70,76923077	0,429257376	n.s	73,78435518	0	73,78435518	0,719030388	n.s
RASGEF1C	NaN	n.s	0.305980874546661	n.s	27,03296703	0	27,03296703	0,88336279	n.s	23,89006342	0	23,89006342	0,829333015	n.s
ZPBP	NaN	n.s	0.0492225660250683	n.s	0,43956044	0	0,43956044	1,56E-14	n.s	2,114164905	0	2,114164905	0,000303668	n.s
SMPX	NaN	n.s	0.939527216803017	n.s	22,1978022	0	22,1978022	0,8503798	n.s	21,77589852	0	21,77589852	0,809809344	n.s
GLYATL1	NaN	n.s	0.29833548279508	n.s	13,62637363	0	13,62637363	0,693928181	n.s	16,27906977	0	16,27906977	0,726603479	n.s
KCNJ13	NaN	n.s	0.107909476640197	n.s	6,593406593	0	6,593406593	0,19238467	n.s	4,016913319	0	4,016913319	0,026653234	n.s
NPPC	NaN	n.s	2.30354401441098e-61	lusc	4,835164835	0	4,835164835	0,052352371	n.s	54,96828753	0	54,96828753	0,869182639	n.s
PTTG2	NaN	n.s	0.201733029055063	n.s	1,098901099	0	1,098901099	4,22E-09	n.s	0,21141649	0	0,21141649	2,24E-14	n.s
FOXB1	NaN	n.s	6.01899635942348e-11	luad	36,04395604	0	36,04395604	0,896348446	n.s	16,91331924	0	16,91331924	0,739799215	n.s
CDRT15	NaN	n.s	0.918194876127062	n.s	11,20879121	0	11,20879121	0,584293685	n.s	10,78224101	0	10,78224101	0,528218081	n.s
POTEE	NaN	n.s	9.38091517100652e-17	lusc	7,032967033	0	7,032967033	0,236376804	n.s	28,11839323	0	28,11839323	0,857700778	n.s
LRRC3C	NaN	n.s	0.0188564557582771	n.s	2,857142857	0	2,857142857	0,002066819	n.s	0,634249471	0	0,634249471	3,43E-14	n.s
ZSCAN5B	NaN	n.s	0.368863218617579	n.s	1,318681319	0	1,318681319	1,51E-07	n.s	2,325581395	0	2,325581395	0,000721163	n.s
UTF1	NaN	n.s	0.999999999999999	n.s	0,43956044	0	0,43956044	1,56E-14	n.s	0,422832981	0	0,422832981	2,24E-14	n.s
ACER1	NaN	n.s	6.04259761718097e-17	lusc	0,21978022	0	0,21978022	1,56E-14	n.s	15,22198732	0	15,22198732	0,70147482	n.s
THRSP	NaN	n.s	0.239104140357361	n.s	4,395604396	0	4,395604396	0,032893993	n.s	2,748414376	0	2,748414376	0,002687623	n.s
HIST2H3D	NaN	n.s	0.00367728361071991	n.s	14,94505495	0	14,94505495	0,734949671	n.s	22,62156448	0	22,62156448	0,818174379	n.s
SYT10	NaN	n.s	1.07254824951747e-06	n.s	2,417582418	0	2,417582418	0,000478719	n.s	10,57082452	0	10,57082452	0,515994466	n.s
FGF8	NaN	n.s	0.000141233429590511	n.s	9,010989011	0	9,010989011	0,427121179	n.s	17,7589852	0	17,7589852	0,755548798	n.s
BSND	NaN	n.s	0.120836712421957	n.s	5,274725275	0	5,274725275	0,078285304	n.s	8,033826638	0	8,033826638	0,33090875	n.s
HIST1H2AD	NaN	n.s	1.49376687931368e-18	lusc	41,0989011	0	41,0989011	0,875557832	n.s	69,97885835	0	69,97885835	0,769915436	n.s
GPR142	NaN	n.s	0.167109990424467	n.s	5,714285714	0	5,714285714	0,111852795	n.s	8,245243129	0	8,245243129	0,348966088	n.s
ATP5MGL	NaN	n.s	0.135422127156024	n.s	3,736263736	0	3,736263736	0,013285131	n.s	1,902748414	0	1,902748414	0,000107006	n.s
SLC28A1	NaN	n.s	1.85442943530891e-06	n.s	20,65934066	0	20,65934066	0,83513673	n.s	9,302325581	0	9,302325581	0,432403301	n.s
DSC1	NaN	n.s	2.91250040545974e-87	lusc	3,296703297	0	3,296703297	0,005883465	n.s	65,53911205	0	65,53911205	0,811241245	n.s
SRARP	NaN	n.s	0.00802022878127883	n.s	8,131868132	0	8,131868132	0,346388763	n.s	3,805496829	0	3,805496829	0,020214634	n.s
GDPD4	NaN	n.s	3.38509055857529e-05	n.s	24,3956044	0	24,3956044	0,867624242	n.s	13,53065539	0	13,53065539	0,650889188	n.s
SYT6	NaN	n.s	0.203775527665983	n.s	16,04395604	0	16,04395604	0,762226836	n.s	19,45031712	0	19,45031712	0,78189862	n.s
SERPINB4	NaN	n.s	1.20669512769996e-64	lusc	19,56043956	0	19,56043956	0,822116456	n.s	75,4756871	0	75,4756871	0,689623233	n.s
SLC7A3	NaN	n.s	2.29374056708712e-15	lusc	4,615384615	0	4,615384615	0,042148145	n.s	22,83298097	0	22,83298097	0,820143366	n.s
PSMA8	NaN	n.s	0.0774965995867238	n.s	1,538461538	0	1,538461538	1,97E-06	n.s	3,594080338	0	3,594080338	0,014796286	n.s
CLN3	NaN	n.s	0.589155886148457	n.s	0,659340659	0	0,659340659	1,56E-14	n.s	0,21141649	0	0,21141649	2,24E-14	n.s
LOC441155	NaN	n.s	0.930119338085363	n.s	2,857142857	0	2,857142857	0,002066819	n.s	3,171247357	0	3,171247357	0,007090406	n.s
C12orf56	NaN	n.s	1.06623071979154e-62	lusc	40,87912088	0	40,87912088	0,876588364	n.s	92,60042283	0	92,60042283	0,029116676	n.s
PMP2	NaN	n.s	1.35837114074607e-10	lusc	1,758241758	0	1,758241758	1,33E-05	n.s	13,10782241	0	13,10782241	0,635750288	n.s
SPRR3	NaN	n.s	3.1372023602765e-76	lusc	5,934065934	0	5,934065934	0,130578333	n.s	64,27061311	0	64,27061311	0,820601296	n.s
NEUROG3	NaN	n.s	0.00128552762351725	n.s	5,934065934	0	5,934065934	0,130578333	n.s	1,691331924	0	1,691331924	2,85E-05	n.s
DMRT3	NaN	n.s	3.68285195177002e-63	lusc	12,74725275	0	12,74725275	0,66009407	n.s	67,01902748	0	67,01902748	0,799099139	n.s
CELA1	NaN	n.s	0.421281142508862	n.s	0,879120879	0	0,879120879	1,83E-11	n.s	1,691331924	0	1,691331924	2,85E-05	n.s
IFIT1B	NaN	n.s	0.122973895305291	n.s	0,879120879	0	0,879120879	1,83E-11	n.s	0	0	0	NA	n.s
IL26	NaN	n.s	0.965253307639604	n.s	3,956043956	0	3,956043956	0,018624452	n.s	4,22832981	0	4,22832981	0,033934328	n.s
KRT78	NaN	n.s	1.19839960842189e-53	lusc	26,15384615	0	26,15384615	0,878600412	n.s	76,95560254	0	76,95560254	0,659328657	n.s
NKX2-3	NaN	n.s	3.90909136422215e-21	lusc	6,153846154	0	6,153846154	0,150368874	n.s	30,44397463	0	30,44397463	0,869273896	n.s
MTRNR2L3	NaN	n.s	0.999999999999998	n.s	3,296703297	0	3,296703297	0,005883465	n.s	3,382663848	0	3,382663848	0,01036677	n.s
ACRV1	NaN	n.s	1.50252783239187e-19	lusc	39,12087912	0	39,12087912	0,884387287	n.s	68,9217759	0	68,9217759	0,781188769	n.s
ST20-MTHFS	NaN	n.s	0.000118486000348623	n.s	7,032967033	0	7,032967033	0,236376804	n.s	15,22198732	0	15,22198732	0,70147482	n.s
C9	NaN	n.s	4.67200525638007e-24	lusc	8,351648352	0	8,351648352	0,367407569	n.s	36,36363636	0	36,36363636	0,89099103	n.s
FAM57B	NaN	n.s	0.300946477786324	n.s	32,52747253	0	32,52747253	0,905554575	n.s	29,17547569	0	29,17547569	0,86323826	n.s
RIPPLY1	NaN	n.s	0.202857728351768	n.s	2,637362637	0	2,637362637	0,001049743	n.s	1,268498943	0	1,268498943	4,87E-07	n.s
POU5F2	NaN	n.s	0.0215823923666251	n.s	3,516483516	0	3,516483516	0,009048815	n.s	1,057082452	0	1,057082452	1,96E-08	n.s
IL22RA2	NaN	n.s	0.000398647384734189	n.s	44,3956044	0	44,3956044	0,858401269	n.s	56,23678647	0	56,23678647	0,864091781	n.s
LINC00452	NaN	n.s	0.901536072116944	n.s	2,197802198	0	2,197802198	0,00018585	n.s	2,536997886	0	2,536997886	0,00146747	n.s
CD8B2	NaN	n.s	8.97731108308278e-14	lusc	3,076923077	0	3,076923077	0,003614893	n.s	18,60465116	0	18,60465116	0,769490917	n.s
FGF20	NaN	n.s	0.000192586020112009	n.s	14,50549451	0	14,50549451	0,722403114	n.s	6,765327696	0	6,765327696	0,216832269	n.s
LIM2	NaN	n.s	0.0260614979647447	n.s	0	0	0	NA	n.s	1,479915433	0	1,479915433	5,05E-06	n.s
GJD4	NaN	n.s	0.392309319137586	n.s	2,417582418	0	2,417582418	0,000478719	n.s	3,594080338	0	3,594080338	0,014796286	n.s
CPNE6	NaN	n.s	0.576118750396007	n.s	7,252747253	0	7,252747253	0,258666905	n.s	8,456659619	0	8,456659619	0,36660228	n.s
NUTM1	NaN	n.s	6.66125731443403e-07	n.s	8,571428571	0	8,571428571	0,387901866	n.s	20,29598309	0	20,29598309	0,792996833	n.s
HIST1H4E	NaN	n.s	3.1522953535477e-16	lusc	23,95604396	0	23,95604396	0,864526262	n.s	50,10570825	0	50,10570825	0,885773608	n.s
TPTE2	NaN	n.s	0.9204355441781	n.s	20,65934066	0	20,65934066	0,83513673	n.s	21,14164905	0	21,14164905	0,802971578	n.s
GSC	NaN	n.s	4.57388087352359e-14	lusc	19,34065934	0	19,34065934	0,819257509	n.s	42,49471459	0	42,49471459	0,905149186	n.s
NKX6-1	NaN	n.s	2.18603762807686e-27	lusc	28,13186813	0	28,13186813	0,888750747	n.s	63,84778013	0	63,84778013	0,823529773	n.s
TMPRSS11D	NaN	n.s	6.15616462297615e-90	lusc	11,64835165	0	11,64835165	0,608425629	n.s	77,58985201	0	77,58985201	0,644819107	n.s
ZMAT4	NaN	n.s	3.02809427876488e-05	n.s	19,34065934	0	19,34065934	0,819257509	n.s	31,50105708	0	31,50105708	0,873861331	n.s
SBSN	NaN	n.s	2.69389642312291e-61	lusc	5,934065934	0	5,934065934	0,130578333	n.s	56,65961945	0	56,65961945	0,862310986	n.s
CRYBA4	NaN	n.s	0.221691675616963	n.s	3,076923077	0	3,076923077	0,003614893	n.s	4,862579281	0	4,862579281	0,064318205	n.s
TBC1D3B	NaN	n.s	0.246468226890722	n.s	6,373626374	0	6,373626374	0,171035397	n.s	4,4397463	0	4,4397463	0,041843083	n.s
IL20	NaN	n.s	1.89295291733825e-07	lusc	0,659340659	0	0,659340659	1,56E-14	n.s	7,822410148	0	7,822410148	0,312472118	n.s
SAA4	NaN	n.s	0.999999999999998	n.s	11,64835165	0	11,64835165	0,608425629	n.s	11,62790698	0	11,62790698	0,572683649	n.s
KCTD8	NaN	n.s	0.563742624637493	n.s	5,934065934	0	5,934065934	0,130578333	n.s	4,862579281	0	4,862579281	0,064318205	n.s
SPINK14	NaN	n.s	1.24678266493925e-07	luad	6,153846154	0	6,153846154	0,150368874	n.s	0	0	0	NA	n.s
RBAK-RBAKDN	NaN	n.s	0.991842478291513	n.s	5,054945055	0	5,054945055	0,063729344	n.s	5,285412262	0	5,285412262	0,092284465	n.s
TGIF2-C20orf24	NaN	n.s	8.26594311612853e-12	lusc	5,714285714	0	5,714285714	0,111852795	n.s	21,35306554	0	21,35306554	0,805308435	n.s
EPS8L3	NaN	n.s	7.09918382110825e-17	luad	36,7032967	0	36,7032967	0,893948597	n.s	12,89640592	0	12,89640592	0,627742091	n.s
ZNF695	NaN	n.s	1.19776375793179e-12	lusc	63,73626374	0	63,73626374	0,627993932	n.s	84,3551797	0	84,3551797	0,410373552	n.s
ANKRD62	NaN	n.s	1.70384891469613e-35	lusc	1,758241758	0	1,758241758	1,33E-05	n.s	33,19238901	0	33,19238901	0,880485962	n.s
FAM19A4	NaN	n.s	1.76107318118228e-08	lusc	6,153846154	0	6,153846154	0,150368874	n.s	18,60465116	0	18,60465116	0,769490917	n.s
HIST1H2BH	NaN	n.s	2.28412709105676e-61	lusc	34,50549451	0	34,50549451	0,901637337	n.s	87,52642706	0	87,52642706	0,2445851	n.s
TRPV5	NaN	n.s	0.202800869350275	n.s	0,879120879	0	0,879120879	1,83E-11	n.s	2,114164905	0	2,114164905	0,000303668	n.s
RFPL3	NaN	n.s	0.165921125762909	n.s	0,659340659	0	0,659340659	1,56E-14	n.s	1,902748414	0	1,902748414	0,000107006	n.s
CEACAM20	NaN	n.s	0.622009846065828	n.s	3,296703297	0	3,296703297	0,005883465	n.s	2,536997886	0	2,536997886	0,00146747	n.s
FABP12	NaN	n.s	2.72420970502601e-05	n.s	0,43956044	0	0,43956044	1,56E-14	n.s	5,285412262	0	5,285412262	0,092284465	n.s
NPFFR2	NaN	n.s	0.938980774159844	n.s	16,04395604	0	16,04395604	0,762226836	n.s	15,6448203	0	15,6448203	0,712039028	n.s
CCDC168	NaN	n.s	0.986994850610745	n.s	4,835164835	0	4,835164835	0,052352371	n.s	5,073995772	0	5,073995772	0,077701469	n.s
GOLGA8S	NaN	n.s	0.191680186221932	n.s	1,318681319	0	1,318681319	1,51E-07	n.s	2,748414376	0	2,748414376	0,002687623	n.s
HIST1H4K	NaN	n.s	0.00786811475838443	n.s	39,12087912	0	39,12087912	0,884387287	n.s	47,99154334	0	47,99154334	0,891825894	n.s
PAH	NaN	n.s	0.00010137604169883	n.s	40,43956044	0	40,43956044	0,878611098	n.s	28,11839323	0	28,11839323	0,857700778	n.s
C9orf129	NaN	n.s	0.999999999999999	n.s	2,637362637	0	2,637362637	0,001049743	n.s	2,748414376	0	2,748414376	0,002687623	n.s
HIST1H2AI	NaN	n.s	3.67275176699259e-09	lusc	49,01098901	0	49,01098901	0,827719773	n.s	68,28752643	0	68,28752643	0,787477087	n.s
TRPM8	NaN	n.s	3.8679297053236e-18	luad	65,71428571	0	65,71428571	0,580812872	n.s	36,99788584	0	36,99788584	0,892844877	n.s
IL1RAPL1	NaN	n.s	0.00215216226112617	n.s	2,197802198	0	2,197802198	0,00018585	n.s	6,553911205	0	6,553911205	0,19762874	n.s
IL17C	NaN	n.s	5.39196052713798e-13	luad	27,25274725	0	27,25274725	0,884487981	n.s	8,8794926	0	8,8794926	0,400489398	n.s
RNF225	NaN	n.s	0.134245672249875	n.s	29,45054945	0	29,45054945	0,894505579	n.s	34,24947146	0	34,24947146	0,88423862	n.s
CHRNB4	NaN	n.s	8.48078357280708e-44	lusc	38,46153846	0	38,46153846	0,887120613	n.s	83,08668076	0	83,08668076	0,467387231	n.s
HAND2	NaN	n.s	2.53290311987215e-13	lusc	2,197802198	0	2,197802198	0,00018585	n.s	16,49048626	0	16,49048626	0,731145403	n.s
GPR22	NaN	n.s	1	n.s	3,076923077	0	3,076923077	0,003614893	n.s	3,171247357	0	3,171247357	0,007090406	n.s
RBMXL2	NaN	n.s	0.999999999999999	n.s	0,43956044	0	0,43956044	1,56E-14	n.s	0,422832981	0	0,422832981	2,24E-14	n.s
HOXD4	NaN	n.s	0.521370042000782	n.s	36,26373626	0	36,26373626	0,895557738	n.s	34,03805497	0	34,03805497	0,883509817	n.s
LHB	NaN	n.s	0.999999999999998	n.s	24,17582418	0	24,17582418	0,866094852	n.s	24,10147992	0	24,10147992	0,831049645	n.s
INHBC	NaN	n.s	2.80962851105819e-08	lusc	12,30769231	0	12,30769231	0,640801001	n.s	27,06131078	0	27,06131078	0,851630431	n.s
GAL3ST2	NaN	n.s	0.0270513798312118	n.s	17,58241758	0	17,58241758	0,792617318	n.s	23,67864693	0	23,67864693	0,827577715	n.s
SLC25A47	NaN	n.s	0.918514052759886	n.s	3,076923077	0	3,076923077	0,003614893	n.s	2,748414376	0	2,748414376	0,002687623	n.s
NEUROD2	NaN	n.s	3.19901933810449e-38	lusc	3,956043956	0	3,956043956	0,018624452	n.s	39,32346723	0	39,32346723	0,899066651	n.s
SLC35D3	NaN	n.s	0.813163889786802	n.s	6,373626374	0	6,373626374	0,171035397	n.s	6,976744186	0	6,976744186	0,236148644	n.s
RIMBP3C	NaN	n.s	0.682586333204779	n.s	1,538461538	0	1,538461538	1,97E-06	n.s	2,114164905	0	2,114164905	0,000303668	n.s
PRKCG	NaN	n.s	0.182114660238173	n.s	25,49450549	0	25,49450549	0,874729016	n.s	21,56448203	0	21,56448203	0,807587006	n.s
MAGEB17	NaN	n.s	7.6781186148863e-15	lusc	8,571428571	0	8,571428571	0,387901866	n.s	28,75264271	0	28,75264271	0,861082641	n.s
PLA2G2C	NaN	n.s	2.24691234111906e-47	luad	42,41758242	0	42,41758242	0,86909251	n.s	2,748414376	0	2,748414376	0,002687623	n.s
C1QL2	NaN	n.s	3.11431693590462e-09	luad	20,21978022	0	20,21978022	0,830169191	n.s	6,765327696	0	6,765327696	0,216832269	n.s
RLN3	NaN	n.s	1.48553480073863e-30	luad	32,30769231	0	32,30769231	0,904857847	n.s	3,382663848	0	3,382663848	0,01036677	n.s
FNDC8	NaN	n.s	4.05304954145732e-19	lusc	3,296703297	0	3,296703297	0,005883465	n.s	23,67864693	0	23,67864693	0,827577715	n.s
RLBP1	NaN	n.s	0.000946773858388532	n.s	2,197802198	0	2,197802198	0,00018585	n.s	6,976744186	0	6,976744186	0,236148644	n.s
MTRNR2L9	NaN	n.s	0.999999999999998	n.s	3,516483516	0	3,516483516	0,009048815	n.s	3,382663848	0	3,382663848	0,01036677	n.s
CPA2	NaN	n.s	8.61869052622694e-35	lusc	2,857142857	0	2,857142857	0,002066819	n.s	34,88372093	0	34,88372093	0,886363627	n.s
PGLYRP2	NaN	n.s	3.9716701557152e-06	n.s	2,637362637	0	2,637362637	0,001049743	n.s	10,35940803	0	10,35940803	0,503300102	n.s
IGSF23	NaN	n.s	0.904140868813861	n.s	4,175824176	0	4,175824176	0,025035949	n.s	3,805496829	0	3,805496829	0,020214634	n.s
CYP3A43	NaN	n.s	0.475959256226051	n.s	2,197802198	0	2,197802198	0,00018585	n.s	3,171247357	0	3,171247357	0,007090406	n.s
SUMO4	NaN	n.s	0.000309827992314346	n.s	7,472527473	0	7,472527473	0,280941555	n.s	15,22198732	0	15,22198732	0,70147482	n.s
TMEM269	NaN	n.s	6.89783320753297e-05	n.s	8,351648352	0	8,351648352	0,367407569	n.s	17,33615222	0	17,33615222	0,747919178	n.s
LMX1A	NaN	n.s	0.0646547745523602	n.s	8,351648352	0	8,351648352	0,367407569	n.s	12,26215645	0	12,26215645	0,601801056	n.s
CDCP2	NaN	n.s	0.462054021626022	n.s	0,43956044	0	0,43956044	1,56E-14	n.s	0	0	0	NA	n.s
LOC105372343	NaN	n.s	0.00105699689593825	n.s	15,38461538	0	15,38461538	0,746514547	n.s	8,245243129	0	8,245243129	0,348966088	n.s
PADI1	NaN	n.s	5.09732536215281e-17	lusc	39,56043956	0	39,56043956	0,882508988	n.s	67,23044397	0	67,23044397	0,797244952	n.s
LHCGR	NaN	n.s	5.04996445718512e-20	luad	19,34065934	0	19,34065934	0,819257509	n.s	1,057082452	0	1,057082452	1,96E-08	n.s
C4orf45	NaN	n.s	0.201174084078065	n.s	1,758241758	0	1,758241758	1,33E-05	n.s	0,634249471	0	0,634249471	3,43E-14	n.s
IGLL1	NaN	n.s	0.284714318124561	n.s	2,197802198	0	2,197802198	0,00018585	n.s	3,594080338	0	3,594080338	0,014796286	n.s
TFAP2B	NaN	n.s	3.05989666630976e-17	lusc	7,692307692	0	7,692307692	0,303063289	n.s	29,59830867	0	29,59830867	0,865319512	n.s
C9orf170	NaN	n.s	5.40657121461368e-08	lusc	2,857142857	0	2,857142857	0,002066819	n.s	12,68498943	0	12,68498943	0,619423753	n.s
TCEAL6	NaN	n.s	0.973151003070689	n.s	0,43956044	0	0,43956044	1,56E-14	n.s	0,21141649	0	0,21141649	2,24E-14	n.s
HES7	NaN	n.s	0.146745130649561	n.s	19,34065934	0	19,34065934	0,819257509	n.s	23,46723044	0	23,46723044	0,825782464	n.s
SAG	NaN	n.s	0.403733893128482	n.s	2,197802198	0	2,197802198	0,00018585	n.s	1,268498943	0	1,268498943	4,87E-07	n.s
R3HDML	NaN	n.s	0.485666649912995	n.s	3,296703297	0	3,296703297	0,005883465	n.s	2,325581395	0	2,325581395	0,000721163	n.s
KCNK9	NaN	n.s	8.75126684709334e-23	lusc	20	0	20	0,827568576	n.s	51,1627907	0	51,1627907	0,88250976	n.s
SPATA45	NaN	n.s	0.0068954358527636	n.s	3,296703297	0	3,296703297	0,005883465	n.s	0,634249471	0	0,634249471	3,43E-14	n.s
TFF1	NaN	n.s	1.48627129125325e-11	luad	42,41758242	0	42,41758242	0,86909251	n.s	21,56448203	0	21,56448203	0,807587006	n.s
TRDN	NaN	n.s	3.34116982254744e-21	lusc	6,373626374	0	6,373626374	0,171035397	n.s	30,86680761	0	30,86680761	0,871153916	n.s
KNG1	NaN	n.s	0.0032645014496704	n.s	6,813186813	0	6,813186813	0,214226	n.s	2,536997886	0	2,536997886	0,00146747	n.s
FKBP6	NaN	n.s	0.0370040351424616	n.s	3,516483516	0	3,516483516	0,009048815	n.s	6,765327696	0	6,765327696	0,216832269	n.s
ZSCAN10	NaN	n.s	0.0965271530652192	n.s	6,153846154	0	6,153846154	0,150368874	n.s	3,594080338	0	3,594080338	0,014796286	n.s
OR7D2	NaN	n.s	0.0664530928472875	n.s	4,175824176	0	4,175824176	0,025035949	n.s	7,188160677	0	7,188160677	0,25546501	n.s
TRIM10	NaN	n.s	6.05114147490125e-11	luad	25,49450549	0	25,49450549	0,874729016	n.s	9,090909091	0	9,090909091	0,416699121	n.s
DUXA	NaN	n.s	0.0509782677232628	n.s	0,21978022	0	0,21978022	1,56E-14	n.s	1,691331924	0	1,691331924	2,85E-05	n.s
KCNH5	NaN	n.s	0.0707398061836107	n.s	6,813186813	0	6,813186813	0,214226	n.s	10,35940803	0	10,35940803	0,503300102	n.s
TEX38	NaN	n.s	0.00051190297525489	n.s	11,86813187	0	11,86813187	0,619704692	n.s	5,285412262	0	5,285412262	0,092284465	n.s
GPR31	NaN	n.s	0.77470001121709	n.s	5,274725275	0	5,274725275	0,078285304	n.s	4,651162791	0	4,651162791	0,052230559	n.s
A3GALT2	NaN	n.s	0.311145636360371	n.s	2,637362637	0	2,637362637	0,001049743	n.s	1,479915433	0	1,479915433	5,05E-06	n.s
CA5A	NaN	n.s	1.39565983504327e-10	luad	15,6043956	0	15,6043956	0,751959027	n.s	3,171247357	0	3,171247357	0,007090406	n.s
SLC22A14	NaN	n.s	1.74725735815954e-08	lusc	10,54945055	0	10,54945055	0,543830581	n.s	24,94714588	0	24,94714588	0,837553325	n.s
LINC01638	NaN	n.s	0.37276922313403	n.s	5,714285714	0	5,714285714	0,111852795	n.s	4,22832981	0	4,22832981	0,033934328	n.s
FFAR3	NaN	n.s	0.999999999999998	n.s	0	0	0	NA	n.s	0,21141649	0	0,21141649	2,24E-14	n.s
CRH	NaN	n.s	0.973151003070689	n.s	0,43956044	0	0,43956044	1,56E-14	n.s	0,21141649	0	0,21141649	2,24E-14	n.s
PRH2	NaN	n.s	0.0031087564859342	n.s	5,274725275	0	5,274725275	0,078285304	n.s	10,78224101	0	10,78224101	0,528218081	n.s
NEDD8-MDP1	NaN	n.s	0.0146860072998969	n.s	1,098901099	0	1,098901099	4,22E-09	n.s	3,805496829	0	3,805496829	0,020214634	n.s
CYP3A4	NaN	n.s	0.379252770397453	n.s	5,934065934	0	5,934065934	0,130578333	n.s	4,4397463	0	4,4397463	0,041843083	n.s
NCBP2L	NaN	n.s	0.965304950668538	n.s	0,659340659	0	0,659340659	1,56E-14	n.s	0,422832981	0	0,422832981	2,24E-14	n.s
CPA5	NaN	n.s	0.000672628243686837	n.s	7,692307692	0	7,692307692	0,303063289	n.s	15,01057082	0	15,01057082	0,695912696	n.s
PPP1R2B	NaN	n.s	0.0421823282662648	n.s	2,637362637	0	2,637362637	0,001049743	n.s	5,496828753	0	5,496828753	0,107949818	n.s
RAB6D	NaN	n.s	0.038521294696244	n.s	6,373626374	0	6,373626374	0,171035397	n.s	10,35940803	0	10,35940803	0,503300102	n.s
ABCB11	NaN	n.s	0.855031489207199	n.s	7,912087912	0	7,912087912	0,324912763	n.s	8,456659619	0	8,456659619	0,36660228	n.s
UCP1	NaN	n.s	5.08302875937419e-09	lusc	1,758241758	0	1,758241758	1,33E-05	n.s	11,62790698	0	11,62790698	0,572683649	n.s
ST8SIA2	NaN	n.s	2.94228818291703e-34	lusc	18,68131868	0	18,68131868	0,810100082	n.s	57,92811839	0	57,92811839	0,856694302	n.s
AMER2	NaN	n.s	0.00385587283567869	n.s	0,21978022	0	0,21978022	1,56E-14	n.s	2,748414376	0	2,748414376	0,002687623	n.s
KIRREL2	NaN	n.s	0.858177268683098	n.s	24,3956044	0	24,3956044	0,867624242	n.s	23,67864693	0	23,67864693	0,827577715	n.s
CTRL	NaN	n.s	0.731979367661399	n.s	1,758241758	0	1,758241758	1,33E-05	n.s	1,268498943	0	1,268498943	4,87E-07	n.s
TAS2R10	NaN	n.s	0.930119338085363	n.s	2,857142857	0	2,857142857	0,002066819	n.s	3,171247357	0	3,171247357	0,007090406	n.s
MUC19	NaN	n.s	0.049637951834651	n.s	4,835164835	0	4,835164835	0,052352371	n.s	8,245243129	0	8,245243129	0,348966088	n.s
TH	NaN	n.s	0.364238299753578	n.s	19,56043956	0	19,56043956	0,822116456	n.s	22,1987315	0	22,1987315	0,814093086	n.s
SPATA22	NaN	n.s	0.0915384271780887	n.s	0,879120879	0	0,879120879	1,83E-11	n.s	2,536997886	0	2,536997886	0,00146747	n.s
TMEM151B	NaN	n.s	1.21292780615672e-45	lusc	6,593406593	0	6,593406593	0,19238467	n.s	48,62579281	0	48,62579281	0,890072601	n.s
SUN3	NaN	n.s	0.967453440571938	n.s	19,56043956	0	19,56043956	0,822116456	n.s	19,23890063	0	19,23890063	0,778927516	n.s
CHURC1-FNTB	NaN	n.s	5.22556257967933e-05	n.s	0,659340659	0	0,659340659	1,56E-14	n.s	5,496828753	0	5,496828753	0,107949818	n.s
IL5	NaN	n.s	0.201733029055063	n.s	1,098901099	0	1,098901099	4,22E-09	n.s	0,21141649	0	0,21141649	2,24E-14	n.s
RNASE13	NaN	n.s	0.462054021626022	n.s	0,43956044	0	0,43956044	1,56E-14	n.s	0	0	0	NA	n.s
HIST1H1E	NaN	n.s	0.000750466347060917	n.s	29,01098901	0	29,01098901	0,892665914	n.s	39,74630021	0	39,74630021	0,900110424	n.s
TSPAN16	NaN	n.s	0.268200707955102	n.s	1,318681319	0	1,318681319	1,51E-07	n.s	2,536997886	0	2,536997886	0,00146747	n.s
TCF23	NaN	n.s	0.999999999999999	n.s	0,43956044	0	0,43956044	1,56E-14	n.s	0,422832981	0	0,422832981	2,24E-14	n.s
GDF3	NaN	n.s	0.346954591001249	n.s	0,879120879	0	0,879120879	1,83E-11	n.s	0,21141649	0	0,21141649	2,24E-14	n.s
MYT1L	NaN	n.s	0.311832415735868	n.s	4,175824176	0	4,175824176	0,025035949	n.s	2,748414376	0	2,748414376	0,002687623	n.s
TMEM211	NaN	n.s	5.12180322488121e-05	n.s	6,373626374	0	6,373626374	0,171035397	n.s	14,79915433	0	14,79915433	0,690152456	n.s
SPINK9	NaN	n.s	0.000322175584637741	n.s	9,010989011	0	9,010989011	0,427121179	n.s	3,171247357	0	3,171247357	0,007090406	n.s
HAVCR1	NaN	n.s	3.47093320614154e-47	luad	47,25274725	0	47,25274725	0,840482297	n.s	5,496828753	0	5,496828753	0,107949818	n.s
GSTT2	NaN	n.s	0.999999999999998	n.s	2,417582418	0	2,417582418	0,000478719	n.s	2,536997886	0	2,536997886	0,00146747	n.s
FAM166A	NaN	n.s	5.3167311750046e-11	luad	15,6043956	0	15,6043956	0,751959027	n.s	2,959830867	0	2,959830867	0,004544091	n.s
NPIPB6	NaN	n.s	2.29606009963684e-05	n.s	7,252747253	0	7,252747253	0,258666905	n.s	16,49048626	0	16,49048626	0,731145403	n.s
SERF1A	NaN	n.s	0.0853124983376488	n.s	0,21978022	0	0,21978022	1,56E-14	n.s	1,479915433	0	1,479915433	5,05E-06	n.s
SETSIP	NaN	n.s	0.0950067941429275	n.s	6,153846154	0	6,153846154	0,150368874	n.s	9,302325581	0	9,302325581	0,432403301	n.s
SLC45A2	NaN	n.s	0.208845944048829	n.s	14,50549451	0	14,50549451	0,722403114	n.s	17,7589852	0	17,7589852	0,755548798	n.s
TGM5	NaN	n.s	8.14481022962487e-47	lusc	27,91208791	0	27,91208791	0,887719304	n.s	75,26427061	0	75,26427061	0,693581811	n.s
CDH12	NaN	n.s	1.32784955824977e-11	lusc	9,89010989	0	9,89010989	0,497775685	n.s	27,48414376	0	27,48414376	0,854127333	n.s
SPINK7	NaN	n.s	2.29822645504458e-18	lusc	3,076923077	0	3,076923077	0,003614893	n.s	22,62156448	0	22,62156448	0,818174379	n.s
GDAP1L1	NaN	n.s	0.00833700856929277	n.s	11,20879121	0	11,20879121	0,584293685	n.s	6,131078224	0	6,131078224	0,160067562	n.s
XKR3	NaN	n.s	0.18042973449485	n.s	2,417582418	0	2,417582418	0,000478719	n.s	1,057082452	0	1,057082452	1,96E-08	n.s
PXT1	NaN	n.s	0.999018062292598	n.s	5,714285714	0	5,714285714	0,111852795	n.s	5,496828753	0	5,496828753	0,107949818	n.s
SMIM2	NaN	n.s	0.139806968991308	n.s	2,857142857	0	2,857142857	0,002066819	n.s	1,268498943	0	1,268498943	4,87E-07	n.s
FEZF1	NaN	n.s	0.0167397891713931	n.s	66,15384615	0	66,15384615	0,569416502	n.s	73,57293869	0	73,57293869	0,722367743	n.s
CELF3	NaN	n.s	2.57353509339937e-19	luad	21,53846154	0	21,53846154	0,844222873	n.s	2,325581395	0	2,325581395	0,000721163	n.s
GYPB	NaN	n.s	0.98451350444723	n.s	0,21978022	0	0,21978022	1,56E-14	n.s	0	0	0	NA	n.s
PRB3	NaN	n.s	7.49611324719363e-18	lusc	42,85714286	0	42,85714286	0,866824369	n.s	71,0359408	0	71,0359408	0,757536847	n.s
TPPP2	NaN	n.s	0.999999999999999	n.s	0,879120879	0	0,879120879	1,83E-11	n.s	1,057082452	0	1,057082452	1,96E-08	n.s
TMEM229A	NaN	n.s	2.64787540236698e-18	luad	18,9010989	0	18,9010989	0,813253689	n.s	1,479915433	0	1,479915433	5,05E-06	n.s
CDR1	NaN	n.s	2.53214327834569e-06	n.s	7,472527473	0	7,472527473	0,280941555	n.s	1,057082452	0	1,057082452	1,96E-08	n.s
AKR1C4	NaN	n.s	0.000374051808710599	n.s	27,47252747	0	27,47252747	0,885588632	n.s	38,68921776	0	38,68921776	0,897453144	n.s
P2RX3	NaN	n.s	5.18208527014555e-06	n.s	12,74725275	0	12,74725275	0,66009407	n.s	4,22832981	0	4,22832981	0,033934328	n.s
VGF	NaN	n.s	1.67346098608372e-06	n.s	30,98901099	0	30,98901099	0,90039761	n.s	17,33615222	0	17,33615222	0,747919178	n.s
CFAP97D1	NaN	n.s	0.717369520659788	n.s	0,43956044	0	0,43956044	1,56E-14	n.s	0,845665962	0	0,845665962	1,42E-10	n.s
GPR75-ASB3	NaN	n.s	1	n.s	1,758241758	0	1,758241758	1,33E-05	n.s	1,902748414	0	1,902748414	0,000107006	n.s
SLC7A14	NaN	n.s	5.15284031610207e-06	n.s	1,758241758	0	1,758241758	1,33E-05	n.s	8,66807611	0	8,66807611	0,383784797	n.s
ANKRD20A4	NaN	n.s	0.112668445659397	n.s	4,175824176	0	4,175824176	0,025035949	n.s	6,765327696	0	6,765327696	0,216832269	n.s
PRL	NaN	n.s	0.945584281425674	n.s	3,296703297	0	3,296703297	0,005883465	n.s	3,594080338	0	3,594080338	0,014796286	n.s
KAAG1	NaN	n.s	0.00202725653493893	n.s	5,714285714	0	5,714285714	0,111852795	n.s	1,691331924	0	1,691331924	2,85E-05	n.s
C11orf94	NaN	n.s	0.242909320971252	n.s	4,395604396	0	4,395604396	0,032893993	n.s	6,342494715	0	6,342494715	0,178662404	n.s
CTRB2	NaN	n.s	1	n.s	1,098901099	0	1,098901099	4,22E-09	n.s	1,057082452	0	1,057082452	1,96E-08	n.s
IL4	NaN	n.s	0.0651984650685392	n.s	2,637362637	0	2,637362637	0,001049743	n.s	0,845665962	0	0,845665962	1,42E-10	n.s
PCDHA8	NaN	n.s	5.16731753427894e-08	luad	15,6043956	0	15,6043956	0,751959027	n.s	4,651162791	0	4,651162791	0,052230559	n.s
CLDN34	NaN	n.s	0.126427041203114	n.s	0,43956044	0	0,43956044	1,56E-14	n.s	1,691331924	0	1,691331924	2,85E-05	n.s
TAC1	NaN	n.s	0.664898286135635	n.s	5,714285714	0	5,714285714	0,111852795	n.s	4,862579281	0	4,862579281	0,064318205	n.s
EQTN	NaN	n.s	0.297049220063704	n.s	1,538461538	0	1,538461538	1,97E-06	n.s	2,748414376	0	2,748414376	0,002687623	n.s
GLYATL2	NaN	n.s	1.88880681379386e-41	lusc	15,82417582	0	15,82417582	0,757193007	n.s	58,98520085	0	58,98520085	0,851672327	n.s
P2RY4	NaN	n.s	1.02781160120986e-06	n.s	13,18681319	0	13,18681319	0,677751136	n.s	4,016913319	0	4,016913319	0,026653234	n.s
HS3ST4	NaN	n.s	7.17628997214974e-18	lusc	3,296703297	0	3,296703297	0,005883465	n.s	22,62156448	0	22,62156448	0,818174379	n.s
CIDEC	NaN	n.s	3.13562010450395e-08	luad	14,06593407	0	14,06593407	0,708768642	n.s	3,594080338	0	3,594080338	0,014796286	n.s
UPK1A	NaN	n.s	1.35619368506463e-06	n.s	11,20879121	0	11,20879121	0,584293685	n.s	23,46723044	0	23,46723044	0,825782464	n.s
IL37	NaN	n.s	4.54060695983017e-53	luad	47,47252747	0	47,47252747	0,838965411	n.s	3,594080338	0	3,594080338	0,014796286	n.s
HORMAD2	NaN	n.s	1.13334868877226e-14	luad	18,9010989	0	18,9010989	0,813253689	n.s	2,959830867	0	2,959830867	0,004544091	n.s
OR2C1	NaN	n.s	0.372214021215536	n.s	0,659340659	0	0,659340659	1,56E-14	n.s	1,479915433	0	1,479915433	5,05E-06	n.s
CYP26C1	NaN	n.s	0.683379037378068	n.s	5,494505495	0	5,494505495	0,094369418	n.s	6,342494715	0	6,342494715	0,178662404	n.s
TUSC5	NaN	n.s	0.656342058742734	n.s	1,318681319	0	1,318681319	1,51E-07	n.s	1,902748414	0	1,902748414	0,000107006	n.s
AADACL2	NaN	n.s	1.24758764861717e-26	lusc	0,43956044	0	0,43956044	1,56E-14	n.s	23,67864693	0	23,67864693	0,827577715	n.s
HIST1H3G	NaN	n.s	2.85707620168023e-24	lusc	37,14285714	0	37,14285714	0,892301531	n.s	70,61310782	0	70,61310782	0,76263005	n.s
POTEF	NaN	n.s	7.24175340173289e-24	lusc	10,98901099	0	10,98901099	0,571396158	n.s	40,16913319	0	40,16913319	0,901129785	n.s
SYCE1	NaN	n.s	0.855497938826656	n.s	4,395604396	0	4,395604396	0,032893993	n.s	4,862579281	0	4,862579281	0,064318205	n.s
DEFA4	NaN	n.s	0.98451350444723	n.s	0,21978022	0	0,21978022	1,56E-14	n.s	0	0	0	NA	n.s
KLRC3	NaN	n.s	0.106693858509729	n.s	5,274725275	0	5,274725275	0,078285304	n.s	2,959830867	0	2,959830867	0,004544091	n.s
CHRNA6	NaN	n.s	0.268322509227689	n.s	14,06593407	0	14,06593407	0,708768642	n.s	16,91331924	0	16,91331924	0,739799215	n.s
KRT72	NaN	n.s	2.7002646009403e-08	lusc	0	0	0	NA	n.s	6,976744186	0	6,976744186	0,236148644	n.s
LOC285556	NaN	n.s	0.0121080969382683	n.s	37,14285714	0	37,14285714	0,892301531	n.s	29,17547569	0	29,17547569	0,86323826	n.s
GNRH2	NaN	n.s	0.271267927337334	n.s	9,010989011	0	9,010989011	0,427121179	n.s	11,41649049	0	11,41649049	0,562202164	n.s
GRM5	NaN	n.s	0.794491026965984	n.s	9,010989011	0	9,010989011	0,427121179	n.s	9,725158562	0	9,725158562	0,46227847	n.s
PGAM4	NaN	n.s	4.19952551760331e-05	n.s	4,835164835	0	4,835164835	0,052352371	n.s	12,68498943	0	12,68498943	0,619423753	n.s
FAM187B	NaN	n.s	0.462054021626022	n.s	0,43956044	0	0,43956044	1,56E-14	n.s	0	0	0	NA	n.s
LIPJ	NaN	n.s	0.0119603693949725	n.s	6,813186813	0	6,813186813	0,214226	n.s	11,83932347	0	11,83932347	0,582767146	n.s
HBE1	NaN	n.s	8.93642306776223e-09	lusc	8,351648352	0	8,351648352	0,367407569	n.s	22,1987315	0	22,1987315	0,814093086	n.s
KRT85	NaN	n.s	1.77028730057589e-16	lusc	1,978021978	0	1,978021978	5,78E-05	n.s	18,81606765	0	18,81606765	0,772727163	n.s
TCERG1L	NaN	n.s	0.00231603322310461	n.s	7,692307692	0	7,692307692	0,303063289	n.s	14,16490486	0	14,16490486	0,67158978	n.s
TTR	NaN	n.s	2.74655977300558e-11	luad	16,26373626	0	16,26373626	0,767070301	n.s	3,171247357	0	3,171247357	0,007090406	n.s
CXorf67	NaN	n.s	5.58998605669373e-09	lusc	3,736263736	0	3,736263736	0,013285131	n.s	15,22198732	0	15,22198732	0,70147482	n.s
C4orf50	NaN	n.s	0.756217760203513	n.s	10,76923077	0	10,76923077	0,557915295	n.s	11,62790698	0	11,62790698	0,572683649	n.s
PGPEP1L	NaN	n.s	4.59842153698383e-07	lusc	1,758241758	0	1,758241758	1,33E-05	n.s	9,725158562	0	9,725158562	0,46227847	n.s
CHST5	NaN	n.s	0.753665960385083	n.s	2,417582418	0	2,417582418	0,000478719	n.s	1,902748414	0	1,902748414	0,000107006	n.s
RDM1	NaN	n.s	5.9295904971236e-10	lusc	60,43956044	0	60,43956044	0,693009318	n.s	79,28118393	0	79,28118393	0,600900545	n.s
SHD	NaN	n.s	1	n.s	3,076923077	0	3,076923077	0,003614893	n.s	3,171247357	0	3,171247357	0,007090406	n.s
KRT24	NaN	n.s	6.75015007940268e-18	lusc	6,153846154	0	6,153846154	0,150368874	n.s	27,69556025	0	27,69556025	0,855340762	n.s
ACSM4	NaN	n.s	0.959318365504939	n.s	14,28571429	0	14,28571429	0,715728961	n.s	13,95348837	0	13,95348837	0,664941562	n.s
ANKRD34B	NaN	n.s	9.72544866934911e-05	n.s	47,47252747	0	47,47252747	0,838965411	n.s	34,67230444	0	34,67230444	0,885665301	n.s
NPHS1	NaN	n.s	0.999018062292598	n.s	5,714285714	0	5,714285714	0,111852795	n.s	5,496828753	0	5,496828753	0,107949818	n.s
WNT1	NaN	n.s	0.16762895640568	n.s	9,450549451	0	9,450549451	0,463779977	n.s	6,765327696	0	6,765327696	0,216832269	n.s
SEL1L2	NaN	n.s	0.999999999999998	n.s	0	0	0	NA	n.s	0,21141649	0	0,21141649	2,24E-14	n.s
C1QTNF9B	NaN	n.s	0.642797808068641	n.s	6,813186813	0	6,813186813	0,214226	n.s	7,822410148	0	7,822410148	0,312472118	n.s
OCM	NaN	n.s	2.26553076838654e-12	luad	16,04395604	0	16,04395604	0,762226836	n.s	2,536997886	0	2,536997886	0,00146747	n.s
RFPL2	NaN	n.s	0.134366780935145	n.s	5,714285714	0	5,714285714	0,111852795	n.s	8,456659619	0	8,456659619	0,36660228	n.s
OR10AD1	NaN	n.s	6.92272199697558e-10	luad	14,94505495	0	14,94505495	0,734949671	n.s	3,171247357	0	3,171247357	0,007090406	n.s
CNGB3	NaN	n.s	1.27675049694795e-47	lusc	23,07692308	0	23,07692308	0,857830286	n.s	70,82452431	0	70,82452431	0,760107889	n.s
MIP	NaN	n.s	0.93961690907644	n.s	1,758241758	0	1,758241758	1,33E-05	n.s	1,479915433	0	1,479915433	5,05E-06	n.s
MYO18B	NaN	n.s	3.65981001336493e-20	lusc	13,62637363	0	13,62637363	0,693928181	n.s	40,80338266	0	40,80338266	0,902615001	n.s
PRSS41	NaN	n.s	0.911964958623231	n.s	2,417582418	0	2,417582418	0,000478719	n.s	2,748414376	0	2,748414376	0,002687623	n.s
GRK7	NaN	n.s	1.24333961029601e-87	lusc	4,615384615	0	4,615384615	0,042148145	n.s	67,65327696	0	67,65327696	0,793439588	n.s
SPINK6	NaN	n.s	0.0242061654249899	n.s	9,010989011	0	9,010989011	0,427121179	n.s	13,95348837	0	13,95348837	0,664941562	n.s
MEI4	NaN	n.s	0.000408991680053206	n.s	8,571428571	0	8,571428571	0,387901866	n.s	16,49048626	0	16,49048626	0,731145403	n.s
FAM217A	NaN	n.s	0.122520756860975	n.s	3,516483516	0	3,516483516	0,009048815	n.s	1,691331924	0	1,691331924	2,85E-05	n.s
ZNF556	NaN	n.s	6.75950459568073e-53	lusc	10,10989011	0	10,10989011	0,513776038	n.s	58,13953488	0	58,13953488	0,855715856	n.s
SLC26A3	NaN	n.s	0.417674823270529	n.s	1,098901099	0	1,098901099	4,22E-09	n.s	0,422832981	0	0,422832981	2,24E-14	n.s
ANXA10	NaN	n.s	2.01986827480732e-07	lusc	23,07692308	0	23,07692308	0,857830286	n.s	39,11205074	0	39,11205074	0,898535317	n.s
LDHC	NaN	n.s	0.306599522992066	n.s	9,010989011	0	9,010989011	0,427121179	n.s	6,976744186	0	6,976744186	0,236148644	n.s
TEX12	NaN	n.s	0.0594356997907937	n.s	1,978021978	0	1,978021978	5,78E-05	n.s	0,422832981	0	0,422832981	2,24E-14	n.s
CERS3	NaN	n.s	7.75484916684623e-148	lusc	3,516483516	0	3,516483516	0,009048815	n.s	88,58350951	0	88,58350951	0,187036838	n.s
NKPD1	NaN	n.s	1.9109681628867e-45	lusc	41,53846154	0	41,53846154	0,873457361	n.s	86,25792812	0	86,25792812	0,31376509	n.s
CLDN19	NaN	n.s	9.86053564731682e-20	lusc	1,978021978	0	1,978021978	5,78E-05	n.s	21,56448203	0	21,56448203	0,807587006	n.s
LIX1	NaN	n.s	0.0208764073183508	n.s	4,175824176	0	4,175824176	0,025035949	n.s	8,033826638	0	8,033826638	0,33090875	n.s
IRGM	NaN	n.s	0.000458099343132423	n.s	1,978021978	0	1,978021978	5,78E-05	n.s	6,976744186	0	6,976744186	0,236148644	n.s
C12orf42	NaN	n.s	0.381907799351717	n.s	29,89010989	0	29,89010989	0,896272537	n.s	32,76955603	0	32,76955603	0,878905289	n.s
COL9A1	NaN	n.s	0.00424717277981785	n.s	16,7032967	0	16,7032967	0,776222621	n.s	24,5243129	0	24,5243129	0,834371761	n.s
KLK4	NaN	n.s	0.341234924167603	n.s	11,64835165	0	11,64835165	0,608425629	n.s	13,95348837	0	13,95348837	0,664941562	n.s
KLF1	NaN	n.s	0.00646572588989071	n.s	1,758241758	0	1,758241758	1,33E-05	n.s	5,285412262	0	5,285412262	0,092284465	n.s
FOXI1	NaN	n.s	1.9276355421382e-08	lusc	4,835164835	0	4,835164835	0,052352371	n.s	16,49048626	0	16,49048626	0,731145403	n.s
IGFL2	NaN	n.s	5.39336957761861e-11	lusc	16,04395604	0	16,04395604	0,762226836	n.s	35,09513742	0	35,09513742	0,887052233	n.s
CLEC2L	NaN	n.s	9.53061313794671e-40	lusc	13,84615385	0	13,84615385	0,701507023	n.s	55,39112051	0	55,39112051	0,867526091	n.s
CDH7	NaN	n.s	0.642428473740999	n.s	12,08791209	0	12,08791209	0,630489081	n.s	13,3192389	0	13,3192389	0,643461693	n.s
FAM72C	NaN	n.s	9.35993670523105e-27	lusc	41,31868132	0	41,31868132	0,874514237	n.s	76,10993658	0	76,10993658	0,677213436	n.s
ALX4	NaN	n.s	4.13674546464951e-06	n.s	5,714285714	0	5,714285714	0,111852795	n.s	15,22198732	0	15,22198732	0,70147482	n.s
SERPINB11	NaN	n.s	1.01881027532855e-49	lusc	1,758241758	0	1,758241758	1,33E-05	n.s	42,70613108	0	42,70613108	0,904690792	n.s
PLGLB1	NaN	n.s	0.000271718584807975	n.s	3,956043956	0	3,956043956	0,018624452	n.s	10,35940803	0	10,35940803	0,503300102	n.s
WNT6	NaN	n.s	7.9417138898644e-12	lusc	15,16483516	0	15,16483516	0,740848619	n.s	34,88372093	0	34,88372093	0,886363627	n.s
SNX31	NaN	n.s	4.51863287571051e-85	lusc	4,395604396	0	4,395604396	0,032893993	n.s	66,17336152	0	66,17336152	0,806209955	n.s
OVOL3	NaN	n.s	8.70834035009304e-39	lusc	9,010989011	0	9,010989011	0,427121179	n.s	47,99154334	0	47,99154334	0,891825894	n.s
IGF2BP1	NaN	n.s	1.94980134254716e-23	lusc	38,68131868	0	38,68131868	0,886220482	n.s	71,45877378	0	71,45877378	0,752242988	n.s
CARD17	NaN	n.s	7.22128928583346e-39	lusc	12,52747253	0	12,52747253	0,650662248	n.s	53,06553911	0	53,06553911	0,876179702	n.s
ATP2B3	NaN	n.s	0.00360579901164982	n.s	3,516483516	0	3,516483516	0,009048815	n.s	8,245243129	0	8,245243129	0,348966088	n.s
UNC13C	NaN	n.s	0.00547744013771173	n.s	13,40659341	0	13,40659341	0,686015395	n.s	7,610993658	0	7,610993658	0,293708359	n.s
UROC1	NaN	n.s	0.0488210851319837	n.s	7,472527473	0	7,472527473	0,280941555	n.s	4,22832981	0	4,22832981	0,033934328	n.s
ASIP	NaN	n.s	3.08501716240148e-06	n.s	1,978021978	0	1,978021978	5,78E-05	n.s	9,302325581	0	9,302325581	0,432403301	n.s
ATP4B	NaN	n.s	1.3437436756245e-21	luad	25,49450549	0	25,49450549	0,874729016	n.s	3,382663848	0	3,382663848	0,01036677	n.s
TMEM272	NaN	n.s	0.106145740418254	n.s	4,175824176	0	4,175824176	0,025035949	n.s	2,114164905	0	2,114164905	0,000303668	n.s
GALR2	NaN	n.s	2.49807672837685e-05	n.s	14,28571429	0	14,28571429	0,715728961	n.s	25,58139535	0	25,58139535	0,842080652	n.s
RPL3L	NaN	n.s	7.07644481167269e-46	lusc	21,97802198	0	21,97802198	0,848385243	n.s	68,71035941	0	68,71035941	0,783322572	n.s
CYP2B6	NaN	n.s	8.7924757976536e-05	n.s	9,67032967	0	9,67032967	0,481112045	n.s	3,171247357	0	3,171247357	0,007090406	n.s
BRINP2	NaN	n.s	0.371074547909834	n.s	2,197802198	0	2,197802198	0,00018585	n.s	3,382663848	0	3,382663848	0,01036677	n.s
C15orf53	NaN	n.s	0.0985939753876846	n.s	1,758241758	0	1,758241758	1,33E-05	n.s	0,422832981	0	0,422832981	2,24E-14	n.s
HCG22	NaN	n.s	0.433220710296889	n.s	4,175824176	0	4,175824176	0,025035949	n.s	5,496828753	0	5,496828753	0,107949818	n.s
CORO7-PAM16	NaN	n.s	0.589155886148457	n.s	0,659340659	0	0,659340659	1,56E-14	n.s	0,21141649	0	0,21141649	2,24E-14	n.s
ELAVL2	NaN	n.s	0.0251283481708941	n.s	34,94505495	0	34,94505495	0,900168859	n.s	27,90697674	0	27,90697674	0,856531705	n.s
MSANTD3-TMEFF1	NaN	n.s	0.0341932162735067	n.s	1,098901099	0	1,098901099	4,22E-09	n.s	3,382663848	0	3,382663848	0,01036677	n.s
PNMA8C	NaN	n.s	0.999999999999998	n.s	0	0	0	NA	n.s	0,21141649	0	0,21141649	2,24E-14	n.s
ZAR1	NaN	n.s	0.289113351209497	n.s	2,417582418	0	2,417582418	0,000478719	n.s	1,268498943	0	1,268498943	4,87E-07	n.s
CA10	NaN	n.s	1.90415166001654e-09	luad	28,57142857	0	28,57142857	0,890749199	n.s	12,47357294	0	12,47357294	0,610781478	n.s
SLC12A1	NaN	n.s	1	n.s	1,098901099	0	1,098901099	4,22E-09	n.s	1,057082452	0	1,057082452	1,96E-08	n.s
LCT	NaN	n.s	1.85767753664782e-08	luad	35,16483516	0	35,16483516	0,899422085	n.s	18,60465116	0	18,60465116	0,769490917	n.s
NTN3	NaN	n.s	9.37842610601106e-07	n.s	11,20879121	0	11,20879121	0,584293685	n.s	23,67864693	0	23,67864693	0,827577715	n.s
MTRNR2L10	NaN	n.s	0.514720304560774	n.s	3,956043956	0	3,956043956	0,018624452	n.s	2,959830867	0	2,959830867	0,004544091	n.s
GPHA2	NaN	n.s	0.331224358125777	n.s	7,032967033	0	7,032967033	0,236376804	n.s	5,285412262	0	5,285412262	0,092284465	n.s
INA	NaN	n.s	1.23522134419522e-27	lusc	24,83516484	0	24,83516484	0,870570831	n.s	60,46511628	0	60,46511628	0,844055409	n.s
LRRC26	NaN	n.s	2.0667300550969e-21	luad	26,15384615	0	26,15384615	0,878600412	n.s	3,805496829	0	3,805496829	0,020214634	n.s
ACSM2A	NaN	n.s	0.999999999999998	n.s	0,21978022	0	0,21978022	1,56E-14	n.s	0,422832981	0	0,422832981	2,24E-14	n.s
ZYG11A	NaN	n.s	9.50348674945522e-08	lusc	73,18681319	0	73,18681319	0,343043008	n.s	87,31501057	0	87,31501057	0,256212555	n.s
ZBTB8B	NaN	n.s	0.512926112998886	n.s	27,91208791	0	27,91208791	0,887719304	n.s	25,79281184	0	25,79281184	0,843528333	n.s
GNRHR	NaN	n.s	7.43458661009526e-06	n.s	5,494505495	0	5,494505495	0,094369418	n.s	14,58773784	0	14,58773784	0,684184996	n.s
NXPE4	NaN	n.s	0.0394480248409716	n.s	0,879120879	0	0,879120879	1,83E-11	n.s	2,959830867	0	2,959830867	0,004544091	n.s
SPRR1B	NaN	n.s	7.24987555582459e-74	lusc	15,16483516	0	15,16483516	0,740848619	n.s	74,84143763	0	74,84143763	0,701245863	n.s
ANKRD7	NaN	n.s	1.02975461203132e-06	n.s	22,85714286	0	22,85714286	0,856042859	n.s	37,8435518	0	37,8435518	0,895207151	n.s
IGSF5	NaN	n.s	0.0137122188288855	n.s	16,04395604	0	16,04395604	0,762226836	n.s	10,35940803	0	10,35940803	0,503300102	n.s
ACSM6	NaN	n.s	0.948390602557612	n.s	1,318681319	0	1,318681319	1,51E-07	n.s	1,057082452	0	1,057082452	1,96E-08	n.s
MIA	NaN	n.s	0.00586040845126621	n.s	13,84615385	0	13,84615385	0,701507023	n.s	20,93023256	0	20,93023256	0,800574287	n.s
ZNF98	NaN	n.s	0.0438097736460606	n.s	14,72527473	0	14,72527473	0,728805475	n.s	10,14799154	0	10,14799154	0,490122766	n.s
TEX15	NaN	n.s	3.99978691198064e-11	lusc	21,97802198	0	21,97802198	0,848385243	n.s	42,49471459	0	42,49471459	0,905149186	n.s
PNMA5	NaN	n.s	0.214978502252645	n.s	11,42857143	0	11,42857143	0,596629446	n.s	14,37632135	0	14,37632135	0,67800077	n.s
FOXN4	NaN	n.s	0.406452497071332	n.s	12,52747253	0	12,52747253	0,650662248	n.s	10,57082452	0	10,57082452	0,515994466	n.s
C10orf82	NaN	n.s	3.61605842768269e-12	lusc	12,96703297	0	12,96703297	0,669117069	n.s	32,34672304	0	32,34672304	0,877275882	n.s
TRIM67	NaN	n.s	0.00300636827098213	n.s	19,34065934	0	19,34065934	0,819257509	n.s	12,05073996	0	12,05073996	0,592467909	n.s
ZP1	NaN	n.s	0.707209305567694	n.s	11,86813187	0	11,86813187	0,619704692	n.s	12,89640592	0	12,89640592	0,627742091	n.s
CASKIN1	NaN	n.s	3.06748399285523e-06	n.s	64,3956044	0	64,3956044	0,612996145	n.s	78,43551797	0	78,43551797	0,623866377	n.s
CREB3L3	NaN	n.s	0.00241865971012254	n.s	5,274725275	0	5,274725275	0,078285304	n.s	1,479915433	0	1,479915433	5,05E-06	n.s
ACP4	NaN	n.s	2.77451342621816e-09	lusc	4,175824176	0	4,175824176	0,025035949	n.s	16,27906977	0	16,27906977	0,726603479	n.s
KLHL34	NaN	n.s	0.0472636848145061	n.s	15,38461538	0	15,38461538	0,746514547	n.s	10,78224101	0	10,78224101	0,528218081	n.s
SLC39A2	NaN	n.s	9.71813861103417e-84	lusc	3,956043956	0	3,956043956	0,018624452	n.s	64,90486258	0	64,90486258	0,816033085	n.s
CLEC18B	NaN	n.s	1.21495213772033e-20	lusc	8,791208791	0	8,791208791	0,407819354	n.s	34,24947146	0	34,24947146	0,88423862	n.s
HCRTR2	NaN	n.s	1.40536314217188e-09	lusc	1,098901099	0	1,098901099	4,22E-09	n.s	10,78224101	0	10,78224101	0,528218081	n.s
AHSP	NaN	n.s	0.462054021626022	n.s	0,43956044	0	0,43956044	1,56E-14	n.s	0	0	0	NA	n.s
C16orf47	NaN	n.s	0.999999999999998	n.s	6,153846154	0	6,153846154	0,150368874	n.s	6,131078224	0	6,131078224	0,160067562	n.s
DEFB124	NaN	n.s	0.0699376557774122	n.s	0,659340659	0	0,659340659	1,56E-14	n.s	2,325581395	0	2,325581395	0,000721163	n.s
G6PC2	NaN	n.s	0.999999999999998	n.s	0,21978022	0	0,21978022	1,56E-14	n.s	0,422832981	0	0,422832981	2,24E-14	n.s
CALML3	NaN	n.s	1.9007280050512e-140	lusc	6,813186813	0	6,813186813	0,214226	n.s	89,85200846	0	89,85200846	0,122744349	n.s
BTNL2	NaN	n.s	0.000598391098191698	n.s	1,318681319	0	1,318681319	1,51E-07	n.s	5,708245243	0	5,708245243	0,124564593	n.s
PCK1	NaN	n.s	0.00125465092242682	n.s	9,230769231	0	9,230769231	0,445780319	n.s	3,805496829	0	3,805496829	0,020214634	n.s
NSG2	NaN	n.s	0.0670630478417949	n.s	6,153846154	0	6,153846154	0,150368874	n.s	3,382663848	0	3,382663848	0,01036677	n.s
C17orf99	NaN	n.s	7.43088937426685e-94	lusc	3,736263736	0	3,736263736	0,013285131	n.s	69,13319239	0	69,13319239	0,779016012	n.s
SULT4A1	NaN	n.s	3.48122235016259e-21	lusc	39,56043956	0	39,56043956	0,882508988	n.s	70,61310782	0	70,61310782	0,76263005	n.s
TLR9	NaN	n.s	0.0985939753876846	n.s	1,758241758	0	1,758241758	1,33E-05	n.s	0,422832981	0	0,422832981	2,24E-14	n.s
CALML6	NaN	n.s	2.61492365507416e-12	lusc	26,15384615	0	26,15384615	0,878600412	n.s	48,62579281	0	48,62579281	0,890072601	n.s
HBQ1	NaN	n.s	0.95612157376504	n.s	8,351648352	0	8,351648352	0,367407569	n.s	8,66807611	0	8,66807611	0,383784797	n.s
COL4A2-AS2	NaN	n.s	0.121204640917764	n.s	2,637362637	0	2,637362637	0,001049743	n.s	1,057082452	0	1,057082452	1,96E-08	n.s
CHRNA9	NaN	n.s	0.00625636703194744	n.s	27,25274725	0	27,25274725	0,884487981	n.s	19,45031712	0	19,45031712	0,78189862	n.s
BEND2	NaN	n.s	NaN	n.s	0	0	0	NA	n.s	0	0	0	NA	n.s
GALNT9	NaN	n.s	0.443672556193082	n.s	2,637362637	0	2,637362637	0,001049743	n.s	1,691331924	0	1,691331924	2,85E-05	n.s
ACTN3	NaN	n.s	0.221691675616963	n.s	3,076923077	0	3,076923077	0,003614893	n.s	4,862579281	0	4,862579281	0,064318205	n.s
SHISA9	NaN	n.s	9.02863249012113e-34	lusc	7,252747253	0	7,252747253	0,258666905	n.s	41,86046512	0	41,86046512	0,904980389	n.s
MPP4	NaN	n.s	4.9104249988565e-23	lusc	2,417582418	0	2,417582418	0,000478719	n.s	25,15856237	0	25,15856237	0,839094097	n.s
GNG8	NaN	n.s	0.0129136307321818	n.s	1,318681319	0	1,318681319	1,51E-07	n.s	4,22832981	0	4,22832981	0,033934328	n.s
SLC18A1	NaN	n.s	0.341850642363616	n.s	4,835164835	0	4,835164835	0,052352371	n.s	3,382663848	0	3,382663848	0,01036677	n.s
ZNF705A	NaN	n.s	0.973151003070689	n.s	0,43956044	0	0,43956044	1,56E-14	n.s	0,21141649	0	0,21141649	2,24E-14	n.s
HGFAC	NaN	n.s	0.00019650326536004	n.s	37,36263736	0	37,36263736	0,891463405	n.s	25,79281184	0	25,79281184	0,843528333	n.s
DEC1	NaN	n.s	1.0488549844553e-47	lusc	5,934065934	0	5,934065934	0,130578333	n.s	48,8372093	0	48,8372093	0,88947666	n.s
TUBB8	NaN	n.s	1.46961113232109e-09	luad	31,20879121	0	31,20879121	0,901176096	n.s	14,37632135	0	14,37632135	0,67800077	n.s
RNASE3	NaN	n.s	0.731979367661399	n.s	1,758241758	0	1,758241758	1,33E-05	n.s	1,268498943	0	1,268498943	4,87E-07	n.s
ZNF99	NaN	n.s	0.00898610951540021	n.s	8,351648352	0	8,351648352	0,367407569	n.s	4,016913319	0	4,016913319	0,026653234	n.s
HTR3A	NaN	n.s	2.10844044706414e-15	luad	56,92307692	0	56,92307692	0,746830582	n.s	30,86680761	0	30,86680761	0,871153916	n.s
GHRHR	NaN	n.s	0.0198538269270578	n.s	5,494505495	0	5,494505495	0,094369418	n.s	2,325581395	0	2,325581395	0,000721163	n.s
PSORS1C2	NaN	n.s	1.96688532886755e-17	lusc	12,30769231	0	12,30769231	0,640801001	n.s	36,57505285	0	36,57505285	0,891617126	n.s
FBXO40	NaN	n.s	0.948390602557612	n.s	1,318681319	0	1,318681319	1,51E-07	n.s	1,057082452	0	1,057082452	1,96E-08	n.s
MTRNR2L4	NaN	n.s	0.0126405573609063	n.s	8,131868132	0	8,131868132	0,346388763	n.s	4,016913319	0	4,016913319	0,026653234	n.s
CNTN2	NaN	n.s	2.37946942378716e-09	lusc	7,912087912	0	7,912087912	0,324912763	n.s	22,1987315	0	22,1987315	0,814093086	n.s
KIAA1210	NaN	n.s	0.000191036012791487	n.s	11,20879121	0	11,20879121	0,584293685	n.s	4,4397463	0	4,4397463	0,041843083	n.s
LY75-CD302	NaN	n.s	0.462054021626022	n.s	0,43956044	0	0,43956044	1,56E-14	n.s	0	0	0	NA	n.s
TSPO2	NaN	n.s	1.77673646326958e-11	luad	16,04395604	0	16,04395604	0,762226836	n.s	2,959830867	0	2,959830867	0,004544091	n.s
FTCD	NaN	n.s	5.5757372083445e-05	n.s	24,17582418	0	24,17582418	0,866094852	n.s	36,57505285	0	36,57505285	0,891617126	n.s
MGAM2	NaN	n.s	0.0034745184660194	n.s	10,98901099	0	10,98901099	0,571396158	n.s	17,97040169	0	17,97040169	0,75919219	n.s
PRSS3	NaN	n.s	1.05722621517516e-05	n.s	35,16483516	0	35,16483516	0,899422085	n.s	49,68287526	0	49,68287526	0,887032877	n.s
CLDN24	NaN	n.s	1.18926380954668e-06	n.s	1,978021978	0	1,978021978	5,78E-05	n.s	9,725158562	0	9,725158562	0,46227847	n.s
TULP1	NaN	n.s	2.05975892479476e-44	lusc	17,14285714	0	17,14285714	0,784718028	n.s	62,36786469	0	62,36786469	0,8331042	n.s
SMCO2	NaN	n.s	3.17879044410931e-45	lusc	26,81318681	0	26,81318681	0,882212273	n.s	73,3615222	0	73,3615222	0,725636372	n.s
SLC35G5	NaN	n.s	0.0436270422410503	n.s	1,318681319	0	1,318681319	1,51E-07	n.s	3,594080338	0	3,594080338	0,014796286	n.s
RASA4B	NaN	n.s	0.233871252997515	n.s	0,659340659	0	0,659340659	1,56E-14	n.s	0	0	0	NA	n.s
CBY3	NaN	n.s	0.0783875809166823	n.s	5,494505495	0	5,494505495	0,094369418	n.s	2,959830867	0	2,959830867	0,004544091	n.s
HTR4	NaN	n.s	2.1068578340403e-05	n.s	6,593406593	0	6,593406593	0,19238467	n.s	1,057082452	0	1,057082452	1,96E-08	n.s
CBLN1	NaN	n.s	0.29602273058237	n.s	12,30769231	0	12,30769231	0,640801001	n.s	9,936575053	0	9,936575053	0,476451783	n.s
PRAME	NaN	n.s	1.04895766839571e-32	lusc	52,30769231	0	52,30769231	0,799355764	n.s	88,16067653	0	88,16067653	0,209840925	n.s
TMEM31	NaN	n.s	0.135422127156024	n.s	3,736263736	0	3,736263736	0,013285131	n.s	1,902748414	0	1,902748414	0,000107006	n.s
C8orf44-SGK3	NaN	n.s	0.00420439064430946	n.s	0,879120879	0	0,879120879	1,83E-11	n.s	4,016913319	0	4,016913319	0,026653234	n.s
WDR64	NaN	n.s	3.54966796093366e-13	luad	17,58241758	0	17,58241758	0,792617318	n.s	2,959830867	0	2,959830867	0,004544091	n.s
MCF2	NaN	n.s	0.0188902032847368	n.s	16,48351648	0	16,48351648	0,771732648	n.s	22,83298097	0	22,83298097	0,820143366	n.s
RGR	NaN	n.s	0.999999999999998	n.s	0,21978022	0	0,21978022	1,56E-14	n.s	0,422832981	0	0,422832981	2,24E-14	n.s
FBLL1	NaN	n.s	1.75566578772697e-07	lusc	12,74725275	0	12,74725275	0,66009407	n.s	26,6384778	0	26,6384778	0,849035587	n.s
METTL21C	NaN	n.s	0.462054021626022	n.s	0,43956044	0	0,43956044	1,56E-14	n.s	0	0	0	NA	n.s
FCN2	NaN	n.s	0.011436398336024	n.s	3,076923077	0	3,076923077	0,003614893	n.s	0,634249471	0	0,634249471	3,43E-14	n.s
PROZ	NaN	n.s	9.16776156681673e-07	n.s	15,16483516	0	15,16483516	0,740848619	n.s	28,75264271	0	28,75264271	0,861082641	n.s
LY6G6F	NaN	n.s	0.0150585295831827	n.s	0	0	0	NA	n.s	1,691331924	0	1,691331924	2,85E-05	n.s
ASMT	NaN	n.s	0.682514766961465	n.s	3,296703297	0	3,296703297	0,005883465	n.s	4,016913319	0	4,016913319	0,026653234	n.s
CYP26A1	NaN	n.s	2.74510014146538e-34	lusc	22,85714286	0	22,85714286	0,856042859	n.s	62,79069767	0	62,79069767	0,830470481	n.s
RNASE7	NaN	n.s	3.15843913223921e-78	lusc	5,714285714	0	5,714285714	0,111852795	n.s	64,90486258	0	64,90486258	0,816033085	n.s
ALOXE3	NaN	n.s	3.54597611891952e-27	lusc	41,97802198	0	41,97802198	0,871302868	n.s	76,95560254	0	76,95560254	0,659328657	n.s
C2orf48	NaN	n.s	3.66744329998066e-09	lusc	41,0989011	0	41,0989011	0,875557832	n.s	60,67653277	0	60,67653277	0,842906454	n.s
CPA4	NaN	n.s	1.32513455104344e-07	lusc	0,879120879	0	0,879120879	1,83E-11	n.s	8,456659619	0	8,456659619	0,36660228	n.s
TEX49	NaN	n.s	0.0198940704928274	n.s	1,538461538	0	1,538461538	1,97E-06	n.s	0	0	0	NA	n.s
HIST2H4A	NaN	n.s	0.318216235970036	n.s	38,9010989	0	38,9010989	0,885309432	n.s	35,5179704	0	35,5179704	0,888401111	n.s
[truncated: 16,144 more rows]
