# Supplementary material for: PenDA, a rank-based method for personalized differential analysis: Application to lung cancer
Source: PLoS Comput Biol. 2020 May 11;16(5):e1007869. doi: 10.1371/journal.pcbi.1007869 (PMC7274464; doi:10.1371/journal.pcbi.1007869)
Supplement: S5 Fig — GO (biological pathways) enrichment in genes significantly down in ADC compared to SQCC (a), significantly up in ADC compared to SQCC (b), significantly down in SQCC compared to ADC (c) and significantly up in SQCC compared to ADC (d). 1000 top hits of prop.test analysis were used to estimate terms enrichment in each condition. Rows of the heatmap correspond to genes overlapping with at least one enriched term (red). Genes with no overlapping terms were removed from the graphical representation. Columns correspond to enriched terms clustered by Euclidean distance. GO Term significance score corresponds to -log10 of the Modified Fisher Exact P-Value after Benjamini correction (extracted from DAVID’s Functional Annotation tool). (PDF) [file pcbi.1007869.s005.pdf]

**b ADC: sign. up genes (relative to SQCC)**

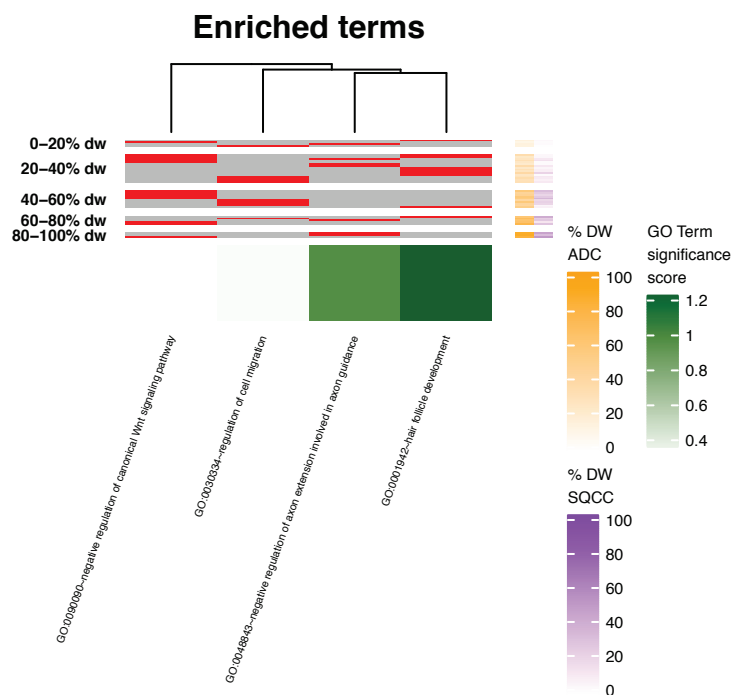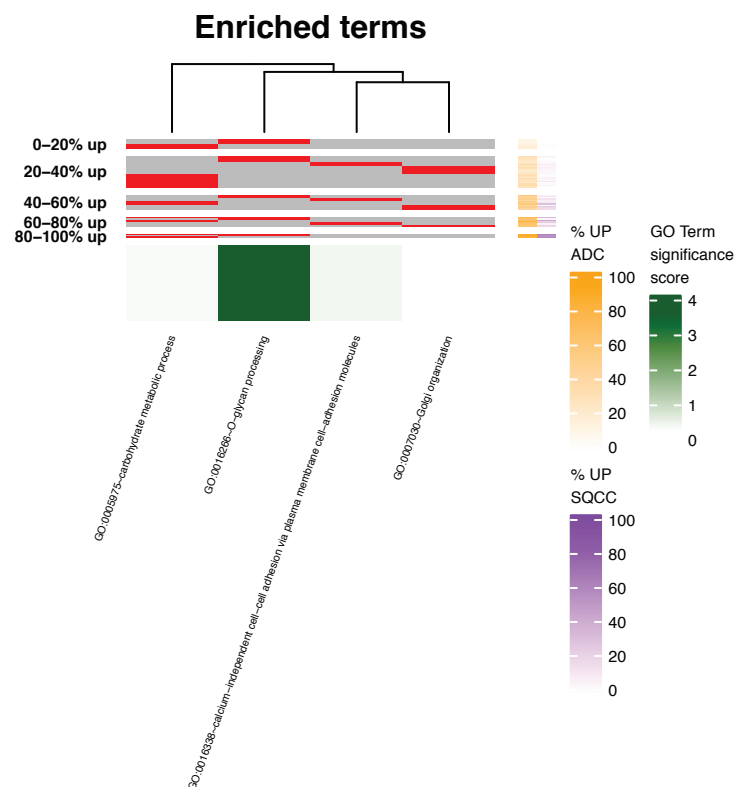

**d SQCC: sign. up genes (relative to ADC)**

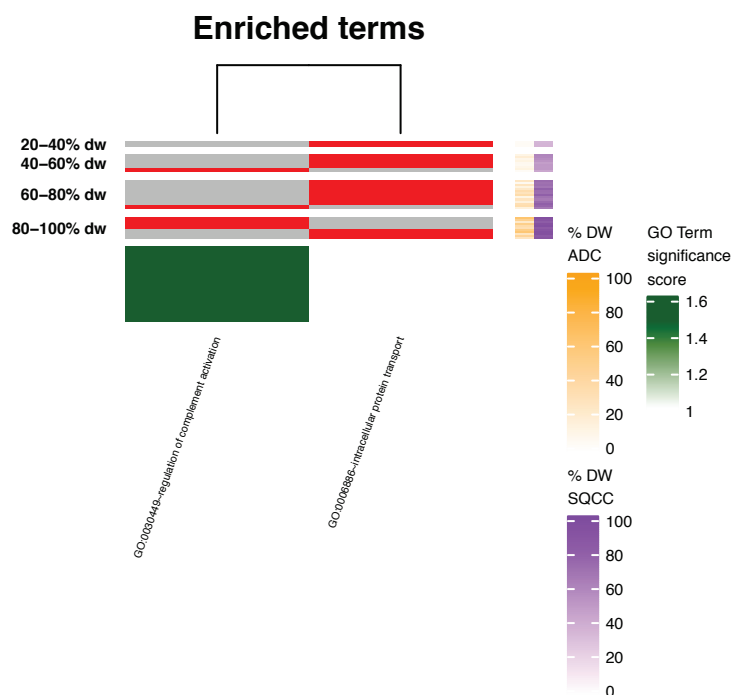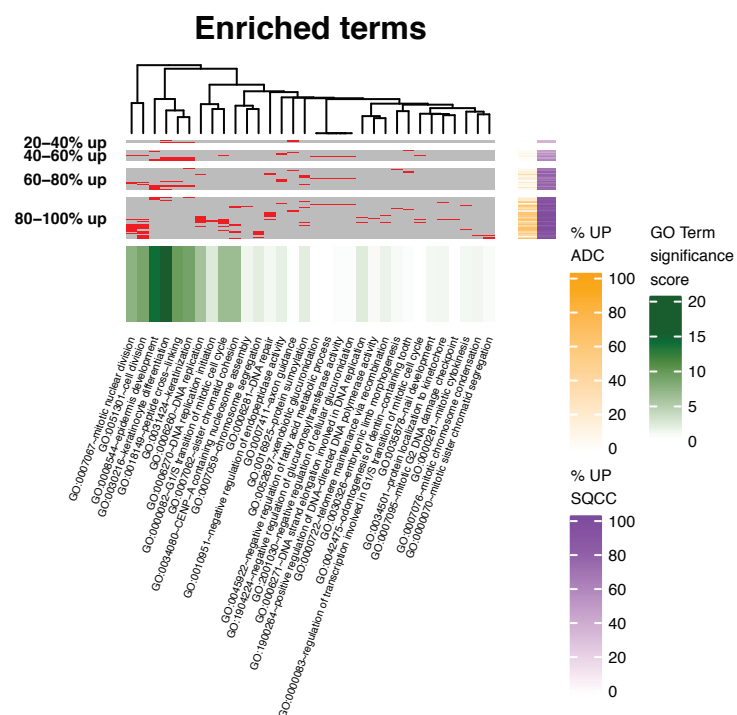

**S5 Fig.** Gene Ontology (biological pathways) enrichment in genes significantly down in ADC compared to SQCC (a), significantly up in ADC compared to SQCC (b), significantly down in SQCC compared to ADC (c) and significantly up in SQCC compared to ADC (d). 1000 top hits of prop.test analysis were used to estimate terms enrichment in each condition. Rows of the heatmap correspond to genes overlapping with at least one enriched term (red). Genes with no overlapping terms were removed from the graphical representation. Columns correspond to enriched terms clustered by Euclidean distance. GO Term significance score corresponds to  $-\log_{10}$  of the Modified Fisher Exact P-Value after Benjamini correction (extracted from DAVID's Functional Annotation tool).
